1 **Mutagenesis Mapping of RNA Structures within the Foot-and-Mouth Disease Virus Genome**  
2 **Reveals Functional Elements Localised in the Polymerase (3D<sup>pol</sup>) Encoding Region.**

3 Lidia Lasecka-Dykes<sup>a,¥,#</sup>, Fiona Tulloch<sup>b,¥,\*</sup>, Peter Simmonds<sup>c</sup>, Garry A. Luke<sup>b</sup>, Paolo Ribeca<sup>a,\*</sup>,  
4 Sarah Gold<sup>a</sup>, Nick J. Knowles<sup>a</sup>, Caroline F. Wright<sup>a</sup>, Jemma Wadsworth<sup>a</sup>, Mehreen Azhar<sup>a</sup>, Donald  
5 P. King<sup>a</sup>, Tobias J. Tuthill<sup>a</sup>, Terry Jackson<sup>a</sup>, Martin D. Ryan<sup>b,#</sup>

6 <sup>a</sup>The Pirbright Institute, Pirbright, Surrey, United Kingdom.

7 <sup>b</sup>Biomedical Sciences Research Complex (BSRC), School of Biology, University of St. Andrews, St.  
8 Andrews, United Kingdom.

9 <sup>c</sup>Nuffield Department of Experimental Medicine, University of Oxford, Oxford, United Kingdom.

10

11 Running Head: Novel functional RNA structures within the FMDV genome

12

13 #Address correspondence to Lidia Lasecka-Dykes, [lidia.dykes@pirbright.ac.uk](mailto:lidia.dykes@pirbright.ac.uk) and Martin D.

14 Ryan, [mdr1@st-andrews.ac.uk](mailto:mdr1@st-andrews.ac.uk)

15 \*Present address: Fiona Tulloch, Benchmark Animal Health, Milton Bridge, Scotland, United  
16 Kingdom; Paolo Ribeca, Biomathematics and Statistics Scotland, Edinburgh, Scotland, United  
17 Kingdom.

18 ¥Lidia Lasecka-Dykes and Fiona Tulloch contributed equally to this work. Author order was  
19 agreed upon by all authors.

20 Keywords: RNA structure, foot-and-mouth disease virus (FMDV), bioinformatics, viral  
21 replication, CDLR-based mutagenesis.

22 Abstract word count: 250 + 155

23 Text word count: 4,592 (without materials and methods section)

## 24 **ABSTRACT**

25 RNA structure plays a crucial role in the replication of positive sense RNA viruses and  
26 can form functional elements within the untranslated regions (UTRs) and the protein coding  
27 sequences (or open reading frames (ORFs)). While RNA structures in the UTRs of several  
28 picornaviruses have been functionally characterised, the roles of putative RNA structures  
29 predicted for the ORF remain largely undefined. Here we have undertaken a bioinformatic  
30 analysis of the foot-and-mouth disease virus (FMDV) genome and predicted the existence of 53  
31 evolutionarily conserved RNA structures within the ORF. Forty-five (45) of these structures were  
32 located in the regions encoding the non-structural proteins (nsps). To investigate if the  
33 structures in the regions encoding the nsps are required for FMDV replication we used a  
34 mutagenesis method, CDLR mapping, where sequential coding segments were shuffled to  
35 minimise RNA secondary structures while preserving protein coding, native dinucleotide  
36 frequencies and codon usage. To examine the impact of these changes on replicative fitness,  
37 mutated sequences were inserted into an FMDV sub-genomic replicon. We found that three of  
38 the RNA structures, all at the 3' termini of the FMDV ORF, were critical for replicon replication.  
39 Contrastingly, disruption of the other 42 conserved RNA structures that lie within the regions  
40 encoding the nsps had no effect on replicon replication, suggesting that these structures are

41 not required for initiating translation or replication of viral RNA. Conserved RNA structures that  
42 are not essential for virus replication could provide ideal targets for the rational attenuation of  
43 a wide range of FMDV strains.

#### 44 **IMPORTANCE**

45 Some RNA structures formed by the genomes of RNA viruses are critical for viral  
46 replication. Our study shows that of 45 conserved RNA structures located within the regions of  
47 the foot-and-mouth disease virus (FMDV) genome that encode the non-structural proteins, only  
48 three are essential for replication of an FMDV sub-genomic replicon. Replicons replication is  
49 only dependent on their RNA translation and synthesis; thus, our results suggest that the three  
50 RNA structures are critical for either initiation of viral RNA translation and/or viral RNA  
51 synthesis. Although further studies are required to identify if the remaining 42 RNA structures  
52 have other roles in virus replication or transmission, they may provide ideal targets for the  
53 rational large-scale attenuation of a wide range of FMDV strains. FMDV causes a highly  
54 contagious disease posing a constant threat to global livestock industries. Such weakened  
55 FMDV strains could be investigated as live-attenuated vaccines or could enhance biosecurity of  
56 conventional inactivated vaccine production.

#### 57 **INTRODUCTION**

58 The genomes of RNA viruses not only encode proteins but also contain non-templated  
59 functional elements in both the coding and untranslated regions (UTRs). These can be  
60 secondary or higher order RNA structures such as simple stem-loops or more complex  
61 structures which include pseudoknots and so-called kissing-loops that mediate long-range RNA-

62 RNA interactions (1-12) . The function, shape and number of such RNA functional elements is  
63 often characteristic for a particular group of viruses, where they play important roles in  
64 processes such as the initiation of viral RNA translation and replication, subgenomic mRNA  
65 transcription, frame shift events, viral RNA encapsidation and modulation of host's antiviral  
66 responses (reviewed in (13)). Since many RNA viruses are of medical and veterinary importance,  
67 characterisation of these RNA structures brings us closer to understanding viral pathogenicity  
68 and provides opportunities for disease control.

69 Foot-and-mouth disease virus (FMDV) is the causative agent of foot-and-mouth disease  
70 (FMD), a highly contagious disease of cloven-hoofed animals (including livestock) (reviewed in  
71 (14)). FMD is endemic in Africa and Asia, where it impacts upon productivity and trade as well  
72 as posing a constant threat of causing costly incursions into disease-free countries (15-21).  
73 Control of FMD by vaccination in endemic settings is complicated by the high antigenic  
74 variability of the seven serotypes of FMDV: A, Asia 1, C (not reported since 2004), O, Southern  
75 African Territories (SAT) 1, SAT 2 and SAT 3 (19, 20, 22-24).

76 FMDV is a small non-enveloped positive-sense single-stranded RNA virus classified in the  
77 species *Foot-and-mouth disease virus*, genus *Aphthovirus* in the family *Picornaviridae*. The  
78 FMDV genome is ~ 8.5 Kb in size and composes of a single, long open reading frame (ORF)  
79 which is flanked by 5' and 3' UTRs (reviewed in (25)). The encoded polyprotein is co- and post-  
80 translationally cleaved by viral proteases (L<sup>pro</sup> and 3C<sup>pro</sup>) and by a ribosomal skipping event  
81 mediated by the 2A peptide into a number of functional precursors and the mature proteins  
82 (26-34). The coding sequence for the FMDV ORF is arbitrarily divided into four regions (5'-L<sup>pro</sup>,

83 P1, P2 and P3-3'). The P1 region encodes the capsid proteins (1A, 1B, 1C and 1D, also called  
84 VP4, VP2, VP3 and VP1, respectively), while the P2 and P3 regions encode the non-structural  
85 proteins (nsps) (reviewed in (25)).

86         There are a number of RNA structures within picornavirus genomes that have been  
87 accurately predicted and characterised biochemically (12, 35-39). These structures are  
88 predominantly located in the UTRs and have been shown to be important for replication and  
89 translation of picornavirus genomes (reviewed in (40)). Within the 5' UTR of the FMDV genome,  
90 the S-fragment forms a single, long hairpin structure (293-381 nucleotides (nts) in length) and  
91 has been reported to play a role in viral replication and innate immune modulation (41-45).  
92 Elsewhere in the 5' UTR, the presence of multiple (2-4) pseudoknots downstream of the poly(C)  
93 tract has been shown to determine virus tropism (41, 46, 47). Other key and well-characterised  
94 RNA structural elements include a type II internal ribosome entry site (IRES), which initiates cap-  
95 independent translation of the viral genome (41, 48-51); while the *cis*-acting replication  
96 element (*cre*) acts as a template for uridylylation of the VPg (3B) protein, which then acts as a  
97 primer for synthesis of viral RNA (52, 53). The 3' UTR of the FMDV genome is located upstream  
98 of the poly(A) tract and contains two RNA stem-loop structures called SL1 and SL2. These stem-  
99 loops interact non-simultaneously with the S-fragment and IRES forming long range interactions  
100 that have been shown to be necessary for viral RNA replication (43, 54, 55).

101         A number of other secondary RNA structures have been predicted computationally to  
102 be present within the FMDV ORF (12). However, with the exception of packaging signals (56),  
103 the role(s) of these structures in the FMDV replication cycle have not been determined. In this

104 study we have identified 45 evolutionarily conserved RNA structures within the regions of the  
105 FMDV ORF that encode for the nsps. Mutagenesis of these structures identified three novel  
106 RNA stem-loops in the coding region of the RNA-dependent RNA polymerase (3D<sup>pol</sup>) that are  
107 essential for replication of an FMDV sub-genomic replicon, suggesting that these structures are  
108 required for either initiation of viral RNA translation and/or viral RNA synthesis. In contrast,  
109 mutagenesis of the remaining 42 structures had no effect on replicon replication. This  
110 approach can aid in the identification of critical viral RNA structures required for viral genome  
111 replication, and also help identify conserved RNA structures that are not essential for virus  
112 replication that could provide ideal targets for the rational attenuation of a wide range of FMDV  
113 strains.

## 114 **RESULTS**

### 115 **Prediction of conserved RNA structures within the FMDV genome**

116 While previous studies have provided evidence that the FMDV genome is highly  
117 structured with conserved RNA base pairing throughout the coding part of the genome (12, 57),  
118 these studies were conducted on a relatively small dataset. Since the number of full genome  
119 sequences available on public databases has greatly increased in recent years, before  
120 conducting functional studies, we revisited these analyses to predict conserved RNA stem-loops  
121 that were common in 118 representative genomic sequences covering all FMDV serotypes (see  
122 materials and methods section for isolates information).

123 Firstly, average mean folding energy differences (MFED) across whole FMDV genomes  
124 were determined for all viral isolates used in this study. In this method, conserved minimum

125 free energy (MFE) values were normalised to MFE values of native sequences that had been  
126 scrambled using an NDR algorithm, which preserves the dinucleotide frequencies of native  
127 sequences. This ensures that reported values are not purely due to G+C or other composition  
128 biases (see material and methods for detail) (58-60). In order to show distribution of the MFED  
129 values along the genome, this analysis employs an incremental sliding window computation  
130 with user-defined window size and increment (61) (in our case 400 and 20 nts, respectively,  
131 where each 400 nts segment overlapped its neighbours by 380 nts). A 400 nts window allowed  
132 for detection of the S-fragment structure, while ignoring potential long-distance RNA-RNA  
133 interactions for which biological significance is hard to verify. Despite the high genomic  
134 sequence diversity across all seven serotypes (20% mean nucleotide pairwise distance ( $\pm$  9%  
135 standard deviation (StDev)), with 31% ( $\pm$  5% StDev) and 14% ( $\pm$  7% StDev) average pairwise  
136 distance in the regions encoding the capsid proteins and the nsps, respectively; Fig. 1), all the  
137 FMDV genomes analysed showed high folding energies across most of their sequence  
138 compared to the permuted controls (Fig. 1). This indicates that all FMDV sequences possess a  
139 similar extent of sequence order-dependent RNA secondary structure. To confirm this, full  
140 genome sequences were grouped into those of Eurasian (A, Asia 1, C and O serotypes) and SAT  
141 (SAT 1-3 serotypes) origin and average MFED values were determined along the genome for  
142 each group. Although we recognize that the grouping may not completely accommodate the  
143 inter-serotypic history of these viruses (see (45) for details why grouping viruses into SAT and  
144 non-SAT clusters is not always correct), the MFED plots showed similar patterns of high and low  
145 MFED values across the genome. MFED values were better correlated between FMDV groups in  
146 the UTRs and the regions encoding the nsps identifying a potentially greater degree of RNA

147 structure conservation compared to the more genetically divergent region encoding the capsid  
148 proteins (Fig. 1).

149 The window size used for MFED scanning does not identify individual RNA structures  
150 and only highlights regions with high folding energies (which may contain dissimilar structures  
151 and/or structures located at different positions). Therefore, RNAalifold program, implemented  
152 in The ViennaRNA Package (62), was used to identify individual conserved RNA stem-loops for  
153 the 118 whole genomic sequences and for individual FMDV serotypes. Stem-loops that were  
154 conserved in all seven serotypes were visualised as a dot plot graph, plotting each nucleotide  
155 pairing (represented by individual dot) against positions of involved nucleotides on the x and y  
156 axes (Fig. 1). Any pairing interactions distanced by more than 400 nts were removed post  
157 analysis. By excluding long-distance interactions post whole genome RNA structure prediction,  
158 we did not ignore the effect they may have on formation of local pairings. RNAalifold cannot  
159 predict pseudoknots, and therefore the region directly downstream of the poly(C) tract was  
160 excluded from our analyses (Fig. 1).

161 These analyses correctly predicted the presence of well-characterised RNA secondary  
162 structures in the FMDV genome: the S-fragment, IRES and *cre*, all located in the 5' UTR, and SL1  
163 and SL2 located in the 3' UTR (Fig. 1 and Fig. S1). It additionally identified several serotype-  
164 specific conserved stem-loops in the region encoding the capsid proteins, but only four of these  
165 were conserved in all seven serotypes. In contrast, 45 stem-loops (when counting each RNA  
166 hairpin individually, even within a single branched structure) were universally present within



167 the regions encoding the nsps (Fig. 1, Table 1). Overall, there were 53 highly conserved stem-  
168 loops in the ORF of the FMDV genome that were conserved across all serotypes (Table 1).

169 **Table 1.** Number of conserved stem-loops within each FMDV genomic region

| Genomic region                  | Number of predicted stem-loops <sup>a</sup> |
|---------------------------------|---------------------------------------------|
| S-fragment                      | 1                                           |
| The rest of 5' UTR <sup>b</sup> | 11*                                         |
| L <sup>pro</sup>                | 4                                           |
| 1A (VP4)                        | 0                                           |
| 1B (VP2)                        | 1                                           |
| 1C (VP3)                        | 1                                           |
| 1 (VP1)                         | 2                                           |
| 2A                              | 1**                                         |
| 2B                              | 7                                           |
| 2C                              | 10                                          |
| 3A                              | 3                                           |
| 3B <sub>1</sub>                 | 1                                           |
| 3B <sub>2</sub>                 | 2                                           |
| 3B <sub>3</sub>                 | 1***                                        |
| 3C                              | 3                                           |
| 3D                              | 17                                          |
| 3' UTR                          | 2                                           |

170 <sup>a</sup>Each hairpin loop was counted individually;

171 <sup>b</sup>Excludes poly(C) tract and pseudoknot regions;

172 \**cre* (a single hairpin loop), IRES domain 2 (a single hairpin loop), IRES domain 3 (five hairpin loops), IRES  
173 domain 4 (two hairpin loops), IRES domain 5 (a single hairpin loop), plus a single hairpin loop  
174 downstream of IRES;

175 \*\*Four nucleotides of the 5' end of the stem belong to the 1D encoding region;

176 \*\*\*17 nucleotides of the 5' end of the stem belong to the 3B<sub>3</sub> encoding region.

177

178 **Use of CDLR mutagenesis for functional mapping of predicted RNA structures**

179           Next, we undertook mutagenesis studies to investigate whether any of the conserved  
180 RNA structures identified in the FMDV genome play a functional role in viral replication. FMDV  
181 replicons lack the region encoding the capsid proteins but are replication competent,  
182 demonstrating that there are no RNA elements essential for translation or replication of viral  
183 RNA within the capsid encoding region. Therefore, our investigation focused on structures  
184 located within the regions encoding the nsps of the replicon. Additionally, the effect on  
185 replication of changes incorporated into the replicon can be analysed in real-time through  
186 monitoring of fluorescence from an integrated green fluorescent protein (GFP) reporter gene  
187 that replaced the region encoding the capsid proteins (63).

188           In order to mutate the conserved RNA structures predicted within the regions encoding  
189 the nsps while maintaining codon composition, codon order and dinucleotide frequencies of  
190 the native WT replicon sequence we applied CDLR scrambling method (11, 57). To monitor its  
191 effectiveness in altering or otherwise disrupting RNA pairing within the native sequence,  
192 sequence of the regions encoding the nsps of WT replicon was randomly permuted 50 times  
193 using the CDLR algorithm. Then, MFED values for these mutants were calculated as described  
194 above and these were compared to MFED values of the native WT replicon sequence and the  
195 corresponding sequences of the 118 FMDV isolates used in this study. Sequences generated by  
196 CDLR showed evidence of severely disrupted RNA secondary structures, with a mean MFED  
197 value of 2.2% (StDev  $\pm 1.4\%$ ), compared to a mean value of 10.9% (StDev  $\pm 1.2\%$ ) for the  
198 corresponding regions of the native FMDV sequences and that of the WT FMDV replicon (Fig.  
199 2).

200 To identify functional RNA structures, we divided the regions encoding the nsps of the  
 201 WT replicon (ptGFP-replicon) into nine consecutive fragments defined by unique restriction  
 202 sites, and individually permuted each fragment using the CDLR algorithm (Fig. 3A-B). To  
 203 further verify the extent of changes to the RNA structure introduced by the CDLR algorithm, we  
 204 used the RNAforester program implemented in The ViennaRNA Package (62, 64, 65). This  
 205 compared the putative structures adopted by the CDLR-permuted regions (shown in Fig. 3A-B)  
 206 to the structures located within the corresponding regions of the WT replicon sequence.  
 207 RNAforester calculates RNA secondary structure alignments based on the tree alignment model  
 208 and quantifies similarity of structures in question, where the relative similarity score values  
 209 equal to one represent two identical structures (62, 64, 65). With the exception of the 2C  
 210 encoding region, which exhibits some structure similarity between CDLR and WT replicon (Fig.  
 211 S2), there was low structural similarity between equivalent WT and CDLR genomic fragments  
 212 (Table 2). RNA structures located in the 5' and 3' UTRs were generally unaffected by any CDLR  
 213 permutation of the adjacent or more distal regions encoding the nsps, with the exception of the  
 214 SL1 stem-loop in the 3' UTR that was shorter by 11 pairings (Fig. S3).

215 **Table 2.** Similarity comparison of RNA structures within corresponding WT and CDLR replicon  
 216 genomic fragments, calculated using RNAforester program

|                                                   | Replicon fragments <sup>a</sup> |       |      |       |       |       |                    |                 |                 |            |              |       |              |
|---------------------------------------------------|---------------------------------|-------|------|-------|-------|-------|--------------------|-----------------|-----------------|------------|--------------|-------|--------------|
|                                                   | $\Delta$ 1D-2B                  | 2B-2C | 2C   | 2C-3A | 3A-3B | 3B-3C | 3C-3D <sub>1</sub> | 3D <sub>2</sub> | 3D <sub>3</sub> | S-fragment | <i>cre</i> * | IRES* | SL1 and SL2* |
| WT vs CDLR relative similarity score <sup>b</sup> | -1.33                           | -0.71 | 0.24 | -0.87 | -0.80 | -1.69 | -1.06              | -0.72           | -1.66           | 1          | 1            | 1     | 0.64         |

217 <sup>a</sup>nsp encoding region fragments as presented in Fig. 3A-B

218 <sup>b</sup>value =1 is for two identical structures: the greater the distance from 1, the less structure similarity between two  
 219 corresponding fragments. For simplicity, the output of RNAforester was rounded up to two decimal places.

220 \*comparison of RNA structures within the 5' and 3' UTR of the WT and CDLR replicon acts as control (note that  
221 while UTR regions were not permuted in this study, there was possibility that permutation of the regions  
222 encoding the nsps might affect the pairings within UTRs).

223

## 224 **CDLR replicon mutants reveal regions of secondary structure required for replication of an** 225 **FMDV replicon**

226 Next, we examined the effect of RNA structure disruption on replication of the FMDV  
227 replicon using mutant replicons containing CDLR-permuted sequences over different parts of  
228 the regions encoding the nsps. For this we used two different continuous cell lines known to  
229 support FMDV replication (Fig. 3A and B). The replication kinetics of the mutant replicons was  
230 compared to the WT ptGFP-replicon and a replicon with an inactive polymerase (ptGFP-  
231 3D<sup>pol</sup>GNN, previously described in (66)). Since replication levels at 8 hours post-transfection  
232 (hpt) were representative of the entire experiment (Fig. S4), for simplicity, data for this time  
233 point are shown. In both cell lines (BHK-21 and MDBK, of hamster and bovine origin,  
234 respectively), all of the CDLR mutant replicons tested displayed replication kinetics comparable  
235 to the WT pt-GFP-replicon except for the replicon which carried a mutated sequence within the  
236 3' terminal part of the 3D<sup>pol</sup> encoding region (called 3D<sub>3</sub>, see Fig. 3C). The replicon with 3D<sub>3</sub>  
237 mutated encoding region was replication defective in both cell lines, with replication levels  
238 equivalent to the negative control replicon (ptGFP-3D<sup>pol</sup>GNN) (Fig. 3C). These results strongly  
239 suggest that this part of the 3D<sup>pol</sup> encoding region contains RNA structures crucial for  
240 replication of the FMDV replicon. Consistent with their inferred location in 3D<sub>3</sub>, CDLR  
241 permutation of the entire Δ1D-3A and 3A-3D<sub>2</sub> encoding region showed little effect on the  
242 replication kinetics (Fig. S5).

243

244 **Modification of individual stem-loops within the 3D<sub>3</sub> region impairs replication of an FMDV**  
245 **replicon**

246 Our results indicate that the region of the FMDV genome encoding for the 3' terminal  
247 end of 3D<sup>pol</sup> (called here 3D<sub>3</sub>) contains conserved secondary RNA structures that may be  
248 necessary for replication of the FMDV replicon. Therefore, the RNA structures present in this  
249 region were investigated in more detail by visualising each individual structure and comparing it  
250 to the corresponding scrambled region within the CDLR mutant. Analysis of corresponding  
251 sequences of FMDV field isolates (over the 3D<sub>3</sub> region) revealed five stem-loops (SL7 – SL11)  
252 with strong nucleotide pairing conservation, with SL10 being the most conserved structure (Fig.  
253 4A). Variability within all structures was accommodated though the occurrence of covariant  
254 changes that preserved nucleotide pairings (Fig. 4A). Additionally, there was substantial  
255 nucleotide sequence conservation in the sequence forming the unpaired loop at the top of the  
256 stem-loop structures (i.e., in the hairpin loops) of SL7, SL8 and SL9 (Fig. 5) implying some  
257 functional constraints on these sequences. Each of the predicted structures in the WT sequence  
258 were substantially disrupted in the CDLR scrambled mutant (Fig. 4B).

259 Further studies were therefore undertaken to dissect the importance of the individual  
260 stem-loops within the 3D<sub>3</sub> fragment for replication of the FMDV replicon. Each of the five  
261 putative RNA structures in the 3D<sub>3</sub> region of the WT replicon were permuted individually *in*  
262 *silico* introducing the maximum number of nucleotide changes possible to disrupt the RNA  
263 structure whilst maintaining amino acid coding, dinucleotide frequencies and the integrity of

264 the neighbouring RNA structures (Fig. 6 and 7A). Additionally, a replicon where all five putative  
265 RNA stem-loops were altered (SL7-11<sup>mut</sup>, using the same mutation strategy as for each  
266 individual loop, Fig. 7A) acted as a negative control (in addition to the replicon with CDLR-  
267 scrambled 3D<sub>3</sub> region) to confirm that mutation of these particular stem-loops, and not of other  
268 elements present in the CDLR replicon with the permuted 3D<sub>3</sub> region, impaired RNA  
269 replication. Replication of ptGFP-replicons carrying individual mutated stem-loops was tested in  
270 the same two cell lines as described above (Fig. 7). As previously observed, replication levels at  
271 8 hpt were representative of the replication kinetics (Fig. S6). Replication of replicons with  
272 disrupted SL7 and SL8 was not affected in either cell line (Fig. 7B). In contrast, replication of  
273 replicons with disrupted SL9 or SL10 were significantly reduced, although the effect on  
274 replication varied between the cell lines. Disruption of SL9 led to only a marginal, but  
275 statistically significant, reduction of replication in BHK-21 cells (GFP intensity equal 94% of the  
276 GFP signal of the WT replicon, p-value=0.02), whereas the negative effect on replication in  
277 MDBK cells was greater (GFP intensity equal 49% of the GFP signal of the WT replicon, p-value <  
278 0.001). In both cell lines, disruption of SL10 reduced replication to a greater extent than  
279 disruption of SL9 (GFP intensity, 52% (p-value < 0.001) of the GFP signal of the WT replicon in  
280 BHK-21 cells, and 24% (p-value < 0.001) of the GFP signal of the WT replicon in MDBK cells),  
281 with the replication profile in bovine cells being close to the replicon with an inactive  
282 polymerase (ptGFP-3D<sup>pol</sup>GNN) and the replicon with the 3D<sub>3</sub> region mutated by the CDLR  
283 algorithm (Fig. 7B). Replication of the replicon with disrupted SL11 was reduced only in MDBK  
284 cells (GFP intensity equal 85% of the GFP signal of the WT replicon, p-value < 0.001), but not  
285 BHK-21 cells. Finally, the replicon with all five stem-loops altered (SL7-11<sup>mut</sup>) demonstrated

286 replication comparable to the ptGFP-3D<sup>pol</sup>GNN replication-deficient control (which give a GFP  
287 signal due to translation of the input RNA) in both cell lines tested (~20% of WT GFP signal, p-  
288 value < 0.001, Fig. 7B).

289 To investigate whether the combined mutagenesis of SL9, SL10 and SL11 has a  
290 detrimental effect on replication of the FMDV replicon, constructs with two loops disrupted  
291 (SL9,10<sup>mut</sup> and SL9,11<sup>mut</sup>), or all three loops disrupted (SL9-11<sup>mut</sup>) were tested as described  
292 above for the individual stem-loop mutations (Fig. 8A). In both cell lines, disruption of SL9 in  
293 combination with SL10 (SL9,10<sup>mut</sup>) resulted in a marked reduction of replicon replication when  
294 compared to replicons with the SL9 and SL10 mutated individually (see Fig. 7B and 8B).  
295 Replication of the SL9,10<sup>mut</sup> replicon was severely disrupted (GFP intensity equal 27% (p-value <  
296 0.001) and GFP intensity equal 20% (p-value < 0.001) of the GFP signal of the WT replicon in  
297 BHK-21 and MDBK cells, respectively), with replication levels comparable to the SL7-11<sup>mut</sup>  
298 negative control (Fig. 8B). Interestingly, disruption of SL11 in combination with SL9 (SL9,11<sup>mut</sup>)  
299 resulted in a significant reduction of replicon replication in both cell lines (GFP intensity equal  
300 60% (p-value < 0.001) and GFP intensity equal 36% (p-value < 0.001) of the GFP signal of the WT  
301 replicon in BHK-21 and MDBK cells, respectively; Fig. 8), although in BHK-21 cells individual  
302 mutation of SL9 and SL11 had only a marginal or no effect, respectively (see Fig. 7). Our  
303 computational prediction of SL9,11<sup>mut</sup> did not suggest any disruption of the SL10 secondary  
304 structure, which is indirectly confirmed by the experimental data where replication impairment  
305 caused by joint permutation within SL9,11<sup>mut</sup> is significantly less than that of the SL9-11<sup>mut</sup> (GFP  
306 intensity equal 60% (p-value < 0.001) vs GFP intensity equal 28% (p-value < 0.001) of the GFP  
307 signal of the WT replicon in BHK cells, and GFP intensity equal 36% (p-value < 0.001) vs GFP

308 intensity equal 20% (p-value <0.001) of the GFP signal of the WT replicon in MDBK cells, Fig.  
 309 8B). In both cell lines tested, disruption of all three stem-loops (SL9-11<sup>mut</sup>) resulted in a  
 310 replication profile comparable to the SL7-11<sup>mut</sup> (Fig. 8B). Table 3 summarises effect of  
 311 mutagenesis of each of these stem-loops (individually and in combination) on replication of the  
 312 FMDV replicon.

313 **Table 3.** Summary of replication profiles of FMDV replicons after mutagenesis of conserved  
 314 stem-loops localised within the 3D<sub>3</sub> genomic region

| Cell Line | Replicon <sup>a</sup> |                    |                    |                     |                     |                       |                       |                       |                       | GNN <sup>b</sup> |
|-----------|-----------------------|--------------------|--------------------|---------------------|---------------------|-----------------------|-----------------------|-----------------------|-----------------------|------------------|
|           | SL7 <sup>mut</sup>    | SL8 <sup>mut</sup> | SL9 <sup>mut</sup> | SL10 <sup>mut</sup> | SL11 <sup>mut</sup> | SL9,10 <sup>mut</sup> | SL9,11 <sup>mut</sup> | SL9-11 <sup>mut</sup> | SL7-11 <sup>mut</sup> |                  |
| BHK-21    | WT                    | WT                 | 94%                | 52%                 | WT                  | 27%                   | 60%                   | 28%                   | 23%                   | 11%              |
| MDBK      | WT                    | WT                 | 49%                | 24%                 | 85%                 | 20%                   | 36%                   | 20%                   | 20%                   | 18%              |

315 <sup>a</sup>See Figure 7 and 8 for study design and data;

316 <sup>b</sup>GNN – replicon with an inactive polymerase, any GFP signal is due to translation;

317 WT – wild-type replicon-like replication profile;

318 % - percentage of the WT ptGFP signal, where significant effect on replicon replication was observed.

319

320 **Comparison of the conserved stem-loops within the FMDV 3D<sub>3</sub> region to structures found in**  
 321 **the 3' terminal 3D encoding region of poliovirus**

322 Two stem loops (referred to as loop  $\alpha$  and  $\beta$  in Song *et al.* 2012) necessary for poliovirus  
 323 (PV) replication are present in the 3' terminal encoding sequence of PV 3D<sup>pol</sup> (37, 38). Since PV  
 324 is a member of a different genus in the family *Picornaviridae* and distantly related to FMDV, we  
 325 investigated whether any of the stem-loop structures found in the 3' end of the 3D<sup>pol</sup> encoding  
 326 region of the FMDV genome were similar to those present in the equivalent part of the PV  
 327 genome. Therefore, we compared each of the FMDV RNA structures (SL7 to SL11) to the PV  
 328 loops  $\alpha$  and  $\beta$  using RNAforester. As described in Table 4, the structures identified in the 3'



329 terminal part of the coding region of FMDV 3D<sup>pol</sup> do not appear to resemble those found in the  
330 equivalent position of the PV genome, while (using the same approach) the *cre* structures of PV  
331 and FMDV showed some structural similarity.

332 **Table 4.** Similarity comparison of RNA structures within the 3D<sup>pol</sup> encoding region of FMDV and  
333 PV, calculated using RNAforester program

| FMDV<br>PV   | SL7   | SL8   | SL9   | SL10  | SL11  | <i>cre</i> * |
|--------------|-------|-------|-------|-------|-------|--------------|
| $\alpha$     | -1.46 | -1.83 | -2.30 | -2.10 | -1.85 | nd           |
| $\beta$      | -1.18 | -2.07 | -2.52 | -2.27 | -2.07 | nd           |
| <i>cre</i> * | nd    | nd    | nd    | nd    | nd    | 0.30         |

334 Relative similarity scores equal to 1 are for two identical structures: the greater the distance from 1, the less  
335 structure similarity between two compared features. For simplicity, the output of RNAforester was rounded up to  
336 two decimal places.

337 \*comparison of *cre* of PV to *cre* of FMDV acts as a control of the structure prediction and RNAforester analysis.

338

## 339 DISCUSSION

340 Many aspects of FMDV replication remain poorly understood, such as the function of  
341 RNA structures found within the ORF. Here we revisited the RNA structural architecture of the  
342 FMDV genome and, for the first time, investigated whether the putative stem-loops localised  
343 within the ORF are required for viral genome replication. Our results are in line with previous  
344 studies showing that FMDV has extensive RNA structure throughout the genome, substantially  
345 exceeding that found in viruses of other genera of the family *Picornaviridae* (e.g. MFED value  
346 >10% for FMDV genomic sequences comparing to <4% for viral sequences belonging to genus  
347 *Enterovirus*, *Hepatovirus*, *Parechovirus* and *Teschovirus*) (12, 57, 60). When compared to the

348 previous structure predictions performed by Witwer *et al.* 2001, our study identified a greater  
349 number of conserved RNA structures within the FMDV ORF (53 stem-loops, with some merging  
350 into 46 branched structures, versus 25 structures predicted previously). Since we used a larger  
351 dataset than the previous authors (118 relatively diverse FMDV sequences versus nine used by  
352 Witer *et al.* 2001), it is possible that we obtained a stronger statistical signal supporting  
353 conservation of these additional structures. Importantly, we found that three of the structures  
354 within the coding region of 3D<sup>pol</sup> (i.e., SL9, SL10 and SL11) are critical for efficient replication of  
355 an FMDV replicon, thereby implying that they would provide the same function during virus  
356 replication.

357         Despite consistently elevated MFED values, the FMDV capsid encoding region contained  
358 only four RNA stem-loops which were conserved in all serotypes. Viral genomes characterised  
359 by high MFED values and low conservation of individual RNA structures have been observed  
360 before (67). For instance, the coding region of hepatitis C virus (HCV) showed elevated MFED  
361 values, while, except for the terminal genomic regions, the individual stem-loop structures were  
362 distinct between different HCV genotypes and even subtypes (67-69). Similarly, FMDV showed  
363 dense serotype-specific RNA structure within its capsid encoding region, which were not shared  
364 among other serotypes (as found in (67) and independently in here).

365         To identify functional RNA structures, we applied the CDLR algorithm to permute a  
366 genomic FMDV sequence (61). While the degree of possible mutagenesis is necessarily limited  
367 by protein coding, dinucleotide frequency, and codon usage constraints, the CDLR algorithm  
368 substantially disrupted secondary RNA structure of the native FMDV sequence in all regions

369 apart from region encoding for 2C (Table 2 and Fig. S2). Since the permutation of the entire  
370  $\Delta$ 1D-3A encoding region (which resulted in more extensive changes to the RNA structure) had a  
371 minimal effect on replication of the FMDV replicon, it is safe to state that conserved RNA stem-  
372 loops within the 2C encoding region are not essential for replicon of the FMDV replication *in*  
373 *vitro*.

374 Contrastingly, the CDLR scanning method identified three structures located at the 3'  
375 terminal part of the 3D<sup>pol</sup> encoding region that were important for replication of the FMDV  
376 replicon. Of these, SL10 showed the highest degree of pairing conservation and appeared to be  
377 the predominant structure important for replication of the FMDV replicon. Mutation of SL9,  
378 SL10 or SL11 showed a much greater reduction of replicon replication in MDBK cells compared  
379 to BHK cells. MDBK cells have been shown to secrete high levels of interferon (IFN) upon  
380 stimulation (70), while BHK-21 cells are known to lack an intact IFN pathway (71, 72).  
381 Furthermore, a number of published results suggest that RNA structure might directly or  
382 indirectly play a role in the modulation of antiviral responses (42, 55, 73, 74). Collectively, these  
383 observations suggest that SL9, SL10 and SL11 could play additional roles in the evasion of  
384 antiviral responses, and therefore mutation of these structures led to a drastic reduction in  
385 replication of the FMDV replicon in IFN-competent cell lines. In both cell lines tested, deletion  
386 of two or more stem-loops (SL9, SL10 and SL11) in combination significantly impaired  
387 replication of the replicon, suggesting that even in the absence of a fully functional antiviral  
388 pathway all three stem-loops are important for FMDV replication. Similarly to the viral genome,  
389 replication of an FMDV replicon involves viral protein synthesis, and the sequential synthesis of  
390 negative- (i.e. complementary) and positive-strand (i.e. genomic) viral RNA. Thus, although SL9-

391 11 are required for replication of the replicon further studies are required to dissect which of  
392 these process (viral RNA translation and/or viral RNA replication) are dependent on SL9, SL10  
393 and SL11. Interestingly, in the PV genome stem-loops within the coding region of 3D<sup>pol</sup> have  
394 been identified that are required for viral RNA synthesis (37, 38). However, these structures do  
395 not appear to share sequence or structural similarity with SL9, SL10 or SL11 in the FMDV  
396 genome.

397         The observation that replication of the FMDV replicon mutants with disrupted RNA  
398 structure elsewhere in the regions encoding the nsps (i.e., spanning 1D through to most of  
399 3D<sup>pol</sup>) was surprising. The maintenance of extensive conserved internal base-pairing and  
400 consistently elevated MFED values observed in the relatively diverse set of FMDV isolate  
401 sequences analysed indeed strongly argues that the RNA structures formed by those genomic  
402 regions must play some functional role in the FMDV replication cycle. It is possible that at least  
403 some of the apparently ‘non-functional’ RNA structures are genome-scale ordered RNA  
404 structure (GORS) which may play a role in persistence of FMDV in its natural host (57, 60).  
405 While FMDV causes an acute disease in domestic animals (14, 75), it is known to persist in  
406 African Buffalo (*Syncerus caffer*), which are a natural reservoir of the virus (76-79). Since FMDV  
407 and African Buffalo are thought to have co-evolved together, it is possible that GORS developed  
408 in the FMDV genome as a part of the virus-host co-adaptation, where they might assist in  
409 evasion of immune recognition. The link between GORS, persistence and ability to minimise  
410 antiviral sensing has been shown for number of unrelated viruses (57, 60, 67, 73). Work is  
411 currently underway to investigate whether any of these remaining structures play a role in  
412 modulation of the antiviral sensing during FMDV replication in its natural host environment.

413           Although the function of the apparently non-essential RNA structures within the regions  
414 encoding the nsps remains to be defined, due to their conserved nature, they form a potential  
415 target for genome-scale attenuation of a wide range of FMDV strains. Such a strategy could  
416 contribute to the development of live attenuated FMD vaccines that may improve on the short  
417 duration of immunity, which is a shortcoming of current inactivated vaccines. Alternatively, the  
418 manipulation of RNA structures such as SL9, to provide attenuation in bovine cells but retain  
419 efficient growth in vaccine production cell lines (BHK), could be used to enhance biosafety of  
420 inactivated vaccine production. The hazards associated with the large-scale production of killed  
421 vaccine viruses include both accidental release of virus from high containment production  
422 facilities, and the distribution and use of improperly inactivated FMD vaccines (80-82).

423           In summary, we have generated a comprehensive map of RNA secondary structure  
424 located within the ORF of the FMDV genome and identified novel stem-loops within the coding  
425 region for 3D<sup>pol</sup> that appear critical for FMDV replication. While the function of the other  
426 conserved structures remains to be determined they can be targeted to improve understanding  
427 of the FMDV biology. In addition, they have the potential to help develop safer FMDV vaccines,  
428 an idea which has been proposed for other viruses (6, 57, 83). We also show that usage of the  
429 CDLR algorithm can be successfully utilised to permute RNA sequences in search of functional  
430 RNA structures, which can be applied beyond viral RNA molecules using a freely available and  
431 easy to use package (61).

## 432 **MATERIALS AND METHODS**

### 433 **Cells**

434 Madin-Darby bovine kidney (MDBK) and baby hamster kidney (BHK-21) cells were  
 435 obtained from the American Type Culture Collection (ATCC) and maintained in Dulbecco's  
 436 Modified Eagle Medium containing either 10% foetal bovine serum (FBS) or 10% horse serum  
 437 (MDBK cells) at 37 °C and 5% CO<sub>2</sub>.

#### 438 **FMDV sequence dataset**

439 To identify conserved putative RNA structures in the FMDV genome, full genome  
 440 sequences of 105 viruses were selected from GenBank database (Table 5). Genomes  
 441 representing sequence variability that is known to be present between all seven serotypes were  
 442 chosen based on nucleotide distance of their 1D (i.e., VP1) encoding region.

443 **Table 5.** FMDV isolates selected from GenBank

| Serotype: | Number of isolates: | GenBank accession numbers:                                                                                                                                                                                       |
|-----------|---------------------|------------------------------------------------------------------------------------------------------------------------------------------------------------------------------------------------------------------|
| A         | 19                  | AY593788, MH053305, JF749843, HM854024, HQ832580, MH053306, KM268896, AY593802, KJ608371, MH053307, AY593751, AY593754, AY593761, AY593764, AY593766, AY593767, HM854022, AY593791, AY593794                     |
| Asia 1    | 12                  | AY593795, AY687334, DQ533483, DQ989306, DQ989315, DQ989319, EF149010, EF614458, HQ632774, JF739177, KM268898, MF782478                                                                                           |
| C         | 6                   | MH053308, KM268897, MH053309, AJ133357, MH053310, AJ007347                                                                                                                                                       |
| O         | 21                  | AY593819, MH053313, MH053311, MH053312, KF112885, KJ206909, HQ632769, HQ632771, KU291242, KR401154, GU384683, KF694737, AJ539140, MH053315, JX040491, MH053317, MH053318, MH053316, KJ560291, DQ404170, KU821591 |
| SAT 1     | 19                  | AY593838, AY593845, MH053319, AY593844, JF749860, MH053321, AY593846, AY593839, AY593842, AY593841, AY593840, MH053322, AY593843, KM268899, MH053323, MH053324, MH053325, MH053326, MH053327                     |
| SAT2      | 15                  | MH053330, MH053332, MH053328, MH053329, JX014255, MH053333, AY593849, JX014256, AY593847, MH053335, KM268900, JF749862, MH053336, MH053337, KU821592                                                             |
| SAT3      | 13                  | AY593853, AY593851, MH053339, MH053340, MH053344, MH053343, AY593850, KJ820999, MH053341, MH053351, KX375417, KM268901, MH053350                                                                                 |

444

445           Since sequences of SAT serotypes are the least represented on public databases, 13  
446 additional full genome sequences of field SAT isolates (SAT 1 = 2, SAT 2 = 4 and SAT 3 = 7) were  
447 generated for the purpose of this study (isolates: SAT1/TAN/3/80, SAT1/ZAM/2/88, SAT2/BOT-  
448 BUFF/7/72, SAT2/MOZ/1/70, SAT2/ZAM-BUFF/18/74, SAT2/ZIM/8/89, SAT3/BOT/209/67,  
449 SAT3/RHO/26/76, SAT3/RHO/3/75, SAT3/SAR/9/79, SAT3/ZAM/P2/96(MUL-4),  
450 SAT3/ZIM/P25/91(UR-7), SAT3/ZIM/P26/90(HV-5) using methodology previously described (45).

#### 451 **Prediction of conserved RNA structures within the FMDV genome**

452           The genomic sequences of the 118 FMDV field isolates were aligned using the MAFFT X-  
453 INS-i algorithm which, in addition to nucleotide identity, takes into account RNA secondary  
454 structure information (84, 85). This approach minimized the potential to overlook conserved  
455 RNA structures that might be hidden in a nucleotide alignment containing distantly related  
456 FMDV sequences. The multiple sequence alignment (MSA) was analysed using the RNAalifold  
457 program implemented in The ViennaRNA Package (62), using the following options: a ribosum  
458 scoring matrix, calculating the partition function and base pairing probability matrix in addition  
459 to the minimum free energy (MFE) structure, producing structure without lonely pairs and with  
460 dangling energies added for the bases adjacent to a helix on both sides. Then, the conserved  
461 RNA structures in the full genome were ‘tidied up’ by removing gaps and long-distance  
462 interactions (i.e., interactions which were separated by 400 nucleotides or more). The same  
463 was repeated for each FMDV serotype individually (using the dataset described above) and  
464 serotype-specific conserved RNA structure prediction was compared to the conserved structure

465 prediction for all 118 FMDV sequences. Only stem-loops which were verified in all seven FMDV  
466 serotypes were considered as highly conserved and other pairings were removed from the  
467 whole genome FMDV RNA structure prediction described above. Finally, the conserved, whole  
468 genome FMDV RNA structure was visualised by drawing a dot plot graph using an awk script  
469 written *in house* and available upon request. To visualise shorter genomic fragments containing  
470 predicted conserved RNA structure(s) (e.g., the 3' terminal part of the 3D<sup>pol</sup> encoding region  
471 and individual loops) in more detail, a particular genomic region together with its conserved  
472 structure prediction was extracted and visualised using an on-line Forna tool implemented in  
473 The ViennaRNA Web Services (86). Extend of nucleotide conservation in sequence forming  
474 hairpin loops of RNA structures (Fig. 5) was visualised using WebLogo 3.7.4 web server (87, 88).

475         Pairwise distance and MFED for full genome sequences of all seven FMDV serotypes  
476 (dataset described above) were prepared using the Sequence Distances and Folding Energy  
477 Scan programs implemented in SSE v1.4 package (61), respectively. The MSA for MFED analysis  
478 was prepared as described above, while controls for calculation of MFED were generated by  
479 randomisation of sequence order while preserving frequencies of dinucleotides (NDR  
480 algorithm) found in the native sequences. For sequence distance analysis the FMDV genomes  
481 were separated into three genomic regions: the 5' UTR, the ORF and the 3' UTR which were  
482 aligned individually by different MAFFT algorithms. The 5' and 3' UTRs were aligned by MAFFT  
483 X-INS-i, while the nucleotide sequence of the ORF was firstly converted into amino acid  
484 sequence using TRANSEQ EMBOS program (89), aligned using MAFFT G-INS-i (90) and then such  
485 generated amino acid alignment was converted into nucleotide sequence using TRANALIGN  
486 EMBOS program (89). All aligned genomic fragments were manually combined into a single



487 MSA containing FMDV whole genomes. For both analyses the mean values for successive 400  
488 base fragments with 20 nucleotide increment across the genome were plotted.

489 The average MFED values of the regions encoding the nsps of the FMDV isolates (i.e.,  
490 dataset described above), the ptGFP replicon and 50 CDLR-permuted ptGFP mutants were  
491 calculated as described above.

492 Since there appears to be a lot of ambiguity around the poly(C) tract, that region and its  
493 flanking positions were excluded from all the analyses.

#### 494 ***In silico* design of mutants containing modified segments within the non-structural encoding** 495 **region**

496 The regions encoding the nsps of the FMDV genome were chosen for mutagenesis by  
497 restriction site usage (sequence listed in Fig. 3A-B). To disrupt RNA secondary structures  
498 predicted in each restriction fragment of native FMDV genomes, sequences were mutated using  
499 the CDLR algorithm implemented in the Scramble Sequences Program of the SSE v1.4 package.  
500 The CDLR algorithm scrambles sequences while keeping amino acid coding, native dinucleotide  
501 frequencies, and codon usage identical to that of native sequences.

502 Structure prediction of the 3' terminal part of the 3D<sup>pol</sup> encoding region of the WT  
503 replicon which was scrambled by the CDLR algorithm (the 3D<sub>3</sub> region) was generated as  
504 described above but using RNAfold (62) rather than RNAalifold (since the former was designed  
505 for structure prediction of an individual genome), and using parameters corresponding to the  
506 ones applied in RNAalifold. The predicted structure was visualised in Forna.

507 To 'quantify' the difference between structure of the WT and scrambled replicons (Fig.  
508 3A-B, Table 2), the whole genomic sequence of WT and each scrambled replicon was predicted  
509 using RNAfold (as described above), and fragments of the RNA secondary structure prediction  
510 corresponding to the permuted regions encoding the nsps (Fig. 3A-B) were compared using  
511 RNAforester and global alignment, with the relative scores as a measure of structure similarity  
512 (62, 64, 65). Structure comparison of the S-fragment, *cre*, IRES, SL1 and SL2 between WT and  
513 scrambled replicons performed as controls.

514 For each predicted RNA structure located at the 3' terminal part of the FMDV 3D<sup>pol</sup>  
515 encoding region (SL7 - SL11 in the 3D<sub>3</sub> region) nucleotides were changed manually so that  
516 putative structures were maximally altered (in both structure and nucleotide identity) while  
517 keeping the amino acid encoding, dinucleotide frequencies and neighbouring putative RNA  
518 structures unaltered. Individual putative stem-loops and their mutants were predicted using  
519 RNAfold implemented in The ViennaRNA package and mfold RNA structure prediction server  
520 (91), and were visualised using Forna RNA secondary structure visualisation tool.

## 521 **Comparison of putative RNA structures located within 3' terminal 3D<sup>pol</sup> encoding region of** 522 **FMDV and PV**

523 Computational prediction of two conserved PV RNA structures located in the 3' terminal  
524 3D<sup>pol</sup> encoding region (termed loop  $\alpha$  and  $\beta$  as in Song *et. al.* 2012) and described previously  
525 (37, 38) was repeated in the same way as it was described for the prediction of RNA structures  
526 located in the FMDV 3D<sup>pol</sup> encoding region. This was done as there was some discrepancy  
527 between the two publications about the exact structure of the two PV stem-loops. PV

528 sequences representing variability of the PV 3D encoding region (GenBank accession numbers:  
529 NC\_002058.3, DQ890388.1, FJ769378.1, EU794963.1, AY560657.1, HF913427.1, EU794957.1,  
530 EU794956.1, AF538842.1, EU684057.1, AF405667.1, AF405666.1, KJ170457.1, KJ170438.1,  
531 KU866422.1, AM884184.1, AJ132961.1, MG212491.1, MG212488.1, MG212485.1,  
532 MG212463.1, MG212456.1, MG212441.1, MG212440.1, KY941933.1, KY941932.1, KR259355.1,  
533 KC784372.1, KC880377.1, JX275352.1, JX274995.1, KX162704.1) were used. The RNA loop  $\alpha$   
534 and  $\beta$  were isolated and their structure aligned to the 3' terminal part of the 3D<sup>pol</sup> encoding  
535 region containing FMDV stem-loops SL7 - SL11 (3D<sub>3</sub> region) using the RNAforester software and  
536 'small-in-large similarity' calculation to determine whether any of the previously described PV  
537 stem-loops were similar to any of the FMDV RNA structures identified in this study. For more  
538 detailed analysis, each isolated FMDV putative RNA stem-loop (SL7 - SL11) was isolated and  
539 compared directly to both PV loop  $\alpha$  and  $\beta$  using RNAforester and global alignment, with the  
540 relative scores as a measure of structure similarity.

#### 541 **Clone construction**

542 Sequences with mutations generated by the CDLR algorithm and nucleotide fragments  
543 containing mutated loops SL7 – SL11 were synthesised by custom DNA synthesis (GeneArt, Life  
544 Technologies) and provided within standard cloning vectors. These sequences were firstly sub-  
545 cloned into the pSP72 vector (Promega) to provide the unique restriction enzyme sites for  
546 subsequent cloning into the WT ptGFP replicon (Fig. 3A; (66)).

#### 547 ***In vitro* transcription**

548 Replicon constructs (5 µg) were linearised with Ascl (New England Biolabs) for 1 h at 37 °C  
549 and purified using the E.Z.N.A.™ Gel Extraction Kit (Omega Bio-Tek). Linear replicon DNA (500  
550 ng) was added to transcription reactions at a final volume of 100 µl containing the following:  
551 Transcription Optimised Buffer (Promega), 10 mM DTT (Promega), 100 U RNasin Ribonuclease  
552 Inhibitor (Promega), 40 U T7 RNA polymerase (Promega), 20 mM rNTP's (Promega) and  
553 nuclease-free water. Reactions were incubated at 37 °C for 2 h and the resulting transcript  
554 integrity assessed by agarose gel electrophoresis. RNA yield was quantified using the Quantus™  
555 Fluorometer (Promega), according to the manufacturer's instructions.

#### 556 **Cell transfection**

557 Approximately 20 h prior to transfection cells were seeded into 24 or 12 well plates at the  
558 appropriate cell seeding density to achieve ~ 80% confluency. The following day, media was  
559 removed and replaced with FluoroBrite™ DMEM (Gibco) supplemented with 2% FBS and 4 mM  
560 glutamine. Replicon transcript RNA (0.5-1 µg) was transfected into triplicate or quadruplicate  
561 cell monolayers using Lipofectamine 2000 transfection reagent as per the manufacturer's  
562 recommendation (Thermo Fisher Scientific).

#### 563 **Live cell imaging**

564 Live cell image analysis was performed using the IncuCyte ZOOM kinetic imaging system  
565 (Essen BioScience) as described previously (63). Images were captured hourly for a period of 24  
566 h with green fluorescent protein intensity measured using the integrated IncuCyte ZOOM image  
567 processing software. Data are shown as the average cell (green object) GFP intensity per well at  
568 8 h post-transfection (where expression is at the maximum level).

569 **Statistical analysis**

570 Replicon mutants were compared to WT ptGFP using one-way analysis of variance  
571 (ANOVA). Differences between groups were considered to be significant at a *P* value of <0.05  
572 (\*), <0.01 (\*\*) or <0.001 (\*\*\*). Error bars represent standard error of the mean (S.E.M.) of  
573 multiple independent experiments. Statistical analyses were performed with GraphPad Prism  
574 8.00 (GraphPad Software, San Diego, California USA, [www.graphpad.com](http://www.graphpad.com)).

575 **Data availability**

576 Full genome FMDV sequences generated as a part of this study were submitted to  
577 GenBank and are available as following accession numbers: MW355668 - MW355680.

578 **TABLES**

579 **Table 1.** Number of conserved stem-loops within each FMDV genomic region

580 **Table 2.** Similarity comparison of RNA structures within corresponding WT and CDLR replicon  
581 genomic fragments, calculated using RNAforester program

582 **Table 3.** Summary of replication profiles of FMDV replicons after mutagenesis of conserved  
583 stem-loops localised within the 3D<sub>3</sub> genomic region

584 **Table 4.** Similarity comparison of RNA structures within the 3D<sup>pol</sup> encoding region of FMDV and  
585 PV, calculated using RNAforester program

586 **Table 5.** FMDV isolates selected from GenBank

587

## 588 **FIGURE LEGENDS**

589 **Figure 1.** Extent of the conserved RNA secondary structures within representative FMDV  
590 genomic sequences (n=118). Upper panel shows a scan of pairwise distance and mean folding  
591 energies difference (MFED) prepared using SSE v1.4 software. The mean values for successive  
592 400 nt fragments across the genome are plotted (where each 400 nts segments overlapped its  
593 neighbours by 380 nts). The light red shading represents error bars showing standard deviation  
594 from the mean for each datapoint. The middle panel shows MFED values for the same FMDV  
595 genomic sequences but grouped into Eurasian (A, Asia 1, C and O serotypes) or SAT (SAT 1 - 3  
596 serotypes) clusters. The lower panel shows a dot plot graphical representation of RNA  
597 structures that were conserved across all seven FMDV serotypes. The x-axis and y-axis  
598 represent FMDV genome positions, with each dot representing a single pairing between two  
599 nucleotides, one with its position marked on the x-axis and the other one with its position  
600 marked on the y-axis. The three pale blue arrows indicate location of the S-fragment, cre+IRES  
601 and SL1+SL2 structures on the dot plot graph, respectively (for a detailed visualisation of these  
602 structures see Fig. S1). The blue triangle marked PK indicates the genomic region containing  
603 pseudoknot structures which was excluded from these analyses. The area corresponding to the  
604 regions encoding the non-structural proteins (i.e., P2 and P3) is highlighted in grey and for  
605 clarity, a schematic representation of the FMDV genome is drawn to scale.

606 **Figure 2.** Comparison of average MFED values for wild type (WT) and CDLR-scrambled  
607 sequences. Mean folding energy difference (MFED) for the regions encoding non-structural  
608 proteins (nsps) of 118 FMDV field isolates representing all seven serotypes (blue dots), WT

609 ptGFP replicon used in the study (red dot) and CDLR scrambled sequences (yellow dots). Among  
610 the latter is the CDLR scrambled sequence used in this study to generate replicon mutants  
611 (purple dot). To obtain CDLR-scrambled sequences the sequence of the regions encoding the  
612 nsps of the WT replicon was permuted 50 times by codon-shuffling to minimise RNA secondary  
613 structure, while preserving protein coding, native dinucleotide frequencies, and codon usage.

614 **Figure 3.** Replication of CDLR replicons within BHK-21 and MDBK cells. **(A)** Schematic  
615 representation of CDLR replicons. Mutated regions were firstly inserted into a sub-clone  
616 encoding the non-structural proteins (nsps) of the genome ( $\Delta 1D$ -polyA) before cloning into the  
617 WT ptGFP replicon using the unique restriction enzymes shown. **(B)** CDLR replicon insert sizes  
618 and number of mutations within each region. Regions were chosen based on restriction site  
619 usage within the regions encoding nsps. Mutations were introduced as described within the  
620 materials and methods section. **(C)** IncuCyte data represent the average cell (green object) GFP  
621 intensity per well at 8 h post-transfection. Results are the mean of three independent  
622 experiments  $\pm$  standard error. Significant differences between WT ptGFP and CDLR replicons  
623 were determined (\*\*\*,  $P < 0.001$ ). The replication-incompetent  $3D^{pol}$  active site mutant (GDD  
624  $\rightarrow$  GNN) ptGFP- $3D^{pol}$ GNN was used as a negative control.

625 **Figure 4.** Schematic representation of predicted conserved RNA structures located at the 3'  
626 terminal end of the region encoding  $3D^{pol}$ . **(A)** Schematic representation of conserved (in all  
627 FMDV serotypes) RNA secondary structures located at the 3' terminal end of the region  
628 encoding  $3D^{pol}$  (i.e., the  $3D_3$  region described in Fig. 3). Conserved putative stem-loops (SL7 –  
629 SL11) are shown, where two stem-loops located in the 3' UTR described before (SL1 and SL2)

630 act as the control of the computational prediction. Nucleotide positions which form conserved  
631 pairing were colour-coded according to number of pairing types ('red = 1' to 'blue = 5') and  
632 conservation of a pairing ('dark shades = nucleotide pairing occurred in all FMDV isolates' to  
633 'light shades = lack of nucleotide pairing in two FMDV isolates'). Positions coloured in light grey  
634 show lack of pairing for three or more FMDV isolates. Black circular outline indicates nucleotide  
635 position where a substitution resulted in an alternative pairing (see included legend for detail).  
636 Unstructured regions are represented as dark grey lines and are not drawn to scale. Numbers  
637 represent nucleotide positions corresponding to the sequence of A/Brazil/1979 isolate  
638 (GenBank accession number AY593788). Supplementary Table S1 specifies details represented  
639 graphically in the figure legend. **(B)** Schematic representation of RNA secondary structures  
640 located in the 3D<sub>3</sub> region after scrambling using the CDLR algorithm, demonstrating how RNA  
641 secondary structure in this region was changed. Mutated nucleotide positions are highlighted in  
642 green. Unstructured regions are represented as dark grey lines and are not drawn to scale.  
643 Numbers represent nucleotide positions corresponding to the sequence of the A/Brazil/1979  
644 isolate.

645 **Figure 5.** Extent of nucleotide conservation within hairpin loops of SL7 - SL11 RNA structures.  
646 Sequence logos were prepared using WebLogo 3.7.4 web server based on sequences of 118  
647 FMDV isolates. Probability shows the extent of nucleotide occurrence at a given position.  
648 Numbers represent nucleotide positions corresponding to the sequence of A/Brazil/1979  
649 isolate (GenBank accession number AY593788). Asterix (\*) marks positions where substitution  
650 occurs in 1 out of 118 FMDV isolates but due to limited resolution of the y axis it does not



651 appear in the sequence logos (these are: A7898G, G7899A and C8020G). The green arrow  
652 points to C7903A substitution which due to height of A symbol could go unnoticed.

653 **Figure 6.** Disruption of the predicted RNA secondary structures by silent mutagenesis. The  
654 conserved stem-loops identified in the 3' terminal end of the region encoding 3D<sup>pol</sup> (i.e., 3D<sub>3</sub>) of  
655 FMDV were predicted individually by Mfold for the WT ptGFP<sub>-</sub>replicon. Predicted WT stem-  
656 loops were mutated to cause the highest possible disruption or change to the RNA structure  
657 without affecting neighbouring stem-loops, while keeping the same amino acid sequence and  
658 dinucleotide ratio (i.e., CpG and UpA). Predicted WT and mutated stem-loops visualised in  
659 Forna web server are shown. Nucleotides highlighted in green represent mutated positions,  
660 while red brackets represent positions of the hairpin loop in the WT structures and their altered  
661 position in the disrupted structures after mutagenesis.

662 **Figure 7.** Effect of individual stem-loop (SL7 - SL11) mutagenesis on replication of the FMDV  
663 replicon. **(A)** Schematic representation of FMDV replicon constructs containing stem-loop  
664 mutations (SL9<sup>mut</sup> – SL11<sup>mut</sup>). Sequence inserts containing stem-loop mutations were cloned  
665 directly into the ptGFP replicon using the unique restriction enzymes BamHI and BspEI. **(B)**  
666 IncuCyte data represent the average cell (green object) GFP intensity per well at 8 h post-  
667 transfection within BHK-21 and MDBK cells. Results are the mean of three independent  
668 experiments ± standard error. Significant differences between WT ptGFP and SL<sup>mut</sup> replicons  
669 were determined (\*,  $P < 0.05$ ; \*\*\*,  $P < 0.001$ ).

670 **Figure 8.** Effect of combined mutagenesis of stem-loops 9, 10 and 11 on replication of the  
671 FMDV replicon. **(A)** Schematic representation of FMDV replicon constructs containing combined

672 stem-loop mutations (SL9,10<sup>mut</sup>, SL9,11<sup>mut</sup> and SL9-11<sup>mut</sup>). Sequence inserts containing stem-  
673 loop mutations were cloned directly into the ptGFP replicon using the unique restriction  
674 enzymes BamHI and BspEI. **(B)** IncuCyte data represent the average cell (green object) GFP  
675 intensity per well at 8 h post-transfection. Results are the mean of three independent  
676 experiments  $\pm$  standard error. Significant differences between WT ptGFP and SL<sup>mut</sup> replicons  
677 were determined (\*\*\*,  $P < 0.001$ ).

## 678 **ACKNOWLEDGMENTS**

679 We thank colleagues in the WRLFMD (Pirbright, UK) for providing the FMDV isolates used in this  
680 study. The Pirbright Institute receives grant-aided support from the Biotechnology and  
681 Biological Sciences Research Council (BBSRC) of the United Kingdom (projects BB/E/I/00007035,  
682 BB/E/I/00007036 and BBS/E/I/00007037) providing funds to cover the open access charges for  
683 this paper. This work was supported by funding from UK Department for Environment, Food  
684 and Rural Affairs (Defra research project SE2943) and BBSRC research grant BB/K003801/1.

## 685 **Author Contributions**

686 Lidia Lasecka-Dykes, Paolo Ribeca and Peter Simmonds performed bioinformatic analyses; Fiona  
687 Tulloch, Garry A. Luke, Lidia Lasecka-Dykes and Sarah Gold carried out experimental work and  
688 analysed data; Nick J. Knowles, Jemma Wadsworth and Mehreen Azhar selected and isolated  
689 viruses; Lidia Lasecka-Dykes and Caroline F. Wright sequenced FMDV isolates and analysed  
690 sequencing data; Fiona Tulloch, Lidia Lasecka-Dykes, Terry Jackson, Tobias J. Tuthill, Martin D.  
691 Ryan, Peter Simmonds and Donald P. King conceived and designed the experiments; Martin D.  
692 Ryan, Terry Jackson, Tobias J. Tuthill and Donald P. King directed the study; Martin D. Ryan,

693 Terry Jackson, Tobias J. Tuthill and Donald P. King acquisitioned the funding; Lidia Lasecka-  
694 Dykes, Fiona Tulloch and Peter Simmonds wrote the initial draft of the manuscript; all authors  
695 reviewed and edited the manuscript.

#### 696 **Conflicts of Interest**

697 The authors declare no conflict of interest. The funders had no role in the design of the study; in  
698 the collection, analyses, or interpretation of data; in the writing of the manuscript, and in the  
699 decision to publish the results.

#### 700 **REFERENCES**

- 701 1. Wang J, Bakkers JM, Galama JM, Bruins Slot HJ, Pilipenko EV, Agol VI, Melchers WJ.  
702 Structural requirements of the higher order RNA kissing element in the enteroviral 3'UTR.  
703 Nucleic Acids Res. 1999;27(2):485-90.
- 704 2. Watts JM, Dang KK, Gorelick RJ, Leonard CW, Bess JW, Jr., Swanstrom R, Burch CL,  
705 Weeks KM. Architecture and secondary structure of an entire HIV-1 RNA genome. Nature.  
706 2009;460(7256):711-6.
- 707 3. Wu B, Grigull J, Ore MO, Morin S, White KA. Global organization of a positive-strand RNA  
708 virus genome. PLoS Pathog. 2013;9(5):e1003363.
- 709 4. Dethoff EA, Boerneke MA, Gokhale NS, Muhire BM, Martin DP, Sacco MT, McFadden  
710 MJ, Weinstein JB, Messer WB, Horner SM, Weeks KM. Pervasive tertiary structure in the  
711 dengue virus RNA genome. P Natl Acad Sci USA. 2018;115(45):11513-8.
- 712 5. Thurner C, Witwer C, Hofacker IL, Stadler PF. Conserved RNA secondary structures in  
713 Flaviviridae genomes. J Gen Virol. 2004;85(Pt 5):1113-24.

- 714 6. Firth AE. Mapping overlapping functional elements embedded within the protein-coding  
715 regions of RNA viruses. *Nucleic Acids Res.* 2014;42(20):12425-39.
- 716 7. Akiyama BM, Laurence HM, Massey AR, Costantino DA, Xie XP, Yang YJ, Shi PY, Nix JC,  
717 Beckham JD, Kieft JS. Zika virus produces noncoding RNAs using a multi-pseudoknot structure  
718 that confounds a cellular exonuclease. *Science.* 2016;354(6316):1148-52.
- 719 8. Tuplin A, Evans DJ, Simmonds P. Detailed mapping of RNA secondary structures in core  
720 and NS5B-encoding region sequences of hepatitis C virus by RNase cleavage and novel  
721 bioinformatic prediction methods. *J Gen Virol.* 2004;85(Pt 10):3037-47.
- 722 9. Ferhadian D, Contrant M, Printz-Schweigert A, Smyth RP, Paillart JC, Marquet R.  
723 Structural and Functional Motifs in Influenza Virus RNAs. *Front Microbiol.* 2018;9:559.
- 724 10. Michalak P, Soszynska-Jozwiak M, Biala E, Moss WN, Keszy J, Szutkowska B, Lenartowicz  
725 E, Kierzek R, Kierzek E. Secondary structure of the segment 5 genomic RNA of influenza A virus  
726 and its application for designing antisense oligonucleotides. *Sci Rep.* 2019;9(1):3801.
- 727 11. Simmonds P, Karakasiliotis I, Bailey D, Chaudhry Y, Evans DJ, Goodfellow IG.  
728 Bioinformatic and functional analysis of RNA secondary structure elements among different  
729 genera of human and animal caliciviruses. *Nucleic Acids Res.* 2008;36(8):2530-46.
- 730 12. Witwer C, Rauscher S, Hofacker IL, Stadler PF. Conserved RNA secondary structures in  
731 Picornaviridae genomes. *Nucleic Acids Res.* 2001;29(24):5079-89.
- 732 13. Tuplin A. Diverse roles and interactions of RNA structures during the replication of  
733 positive-stranded RNA viruses of humans and animals. *J Gen Virol.* 2015;96(Pt 7):1497-503.
- 734 14. Alexandersen S, Zhang Z, Donaldson AI, Garland AJ. The pathogenesis and diagnosis of  
735 foot-and-mouth disease. *J Comp Pathol.* 2003;129(1):1-36.

- 736 15. Kitching RP. Foot-and-mouth disease: current world situation. *Vaccine*. 1999;17(13-  
737 14):1772-4.
- 738 16. King DP, Henstock M. OIE/FAO Foot-and-Mouth Disease Reference Laboratory Network  
739 Annual Report 2016. Disease FWRLfF-a-M; 2016 2016.
- 740 17. Gloster J, Sellers RF, Donaldson AI. Long-Distance Transport of Foot-and-Mouth-Disease  
741 Virus over the Sea. *Veterinary Record*. 1982;110(3):47-52.
- 742 18. Scudamore JM, Harris DM. Control of foot and mouth disease: lessons from the  
743 experience of the outbreak in Great Britain in 2001. *Rev Sci Tech Oie*. 2002;21(3):699-710.
- 744 19. Knowles NJ, Samuel AR. Molecular epidemiology of foot-and-mouth disease virus. *Virus*  
745 *Res*. 2003;91(1):65-80.
- 746 20. Rweyemamu M, Roeder P, Mackay D, Sumption K, Brownlie J, Leforban Y, Valarcher JF,  
747 Knowles NJ, Saraiva V. Epidemiological patterns of foot-and-mouth disease worldwide.  
748 *Transbound Emerg Dis*. 2008;55(1):57-72.
- 749 21. Weaver GV, Domenech J, Thiermann AR, Karesh WB. Foot and mouth disease: a look  
750 from the wild side. *J Wildl Dis*. 2013;49(4):759-85.
- 751 22. Di Nardo A, Knowles NJ, Paton DJ. Combining livestock trade patterns with  
752 phylogenetics to help understand the spread of foot and mouth disease in sub-Saharan Africa,  
753 the Middle East and Southeast Asia. *Rev Sci Tech*. 2011;30(1):63-85.
- 754 23. Samuel AR, Knowles NJ. Foot-and-mouth disease type O viruses exhibit genetically and  
755 geographically distinct evolutionary lineages (topotypes). *J Gen Virol*. 2001;82(Pt 3):609-21.
- 756 24. Kitching P, Hammond J, Jeggo M, Charleston B, Paton D, Rodriguez L, Heckert R. Global  
757 FMD control - Is it an option? *Vaccine*. 2007;25(30):5660-4.

- 758 25. Mason PW, Grubman MJ, Baxt B. Molecular basis of pathogenesis of FMDV. *Virus Res.*  
759 2003;91(1):9-32.
- 760 26. Ryan MD, Belsham GJ, King AM. Specificity of enzyme-substrate interactions in foot-and-  
761 mouth disease virus polyprotein processing. *Virology.* 1989;173(1):35-45.
- 762 27. Strebel K, Beck E. A second protease of foot-and-mouth disease virus. *J Virol.*  
763 1986;58(3):893-9.
- 764 28. Vakharia VN, Devaney MA, Moore DM, Dunn JJ, Grubman MJ. Proteolytic processing of  
765 foot-and-mouth disease virus polyproteins expressed in a cell-free system from clone-derived  
766 transcripts. *J Virol.* 1987;61(10):3199-207.
- 767 29. Klump W, Marquardt O, Hofschneider PH. Biologically-Active Protease of Foot and  
768 Mouth-Disease Virus Is Expressed from Cloned Viral Cdna in Escherichia-Coli. *P Natl Acad Sci-*  
769 *Biol.* 1984;81(11):3351-5.
- 770 30. Belsham GJ. Translation and replication of FMDV RNA. *Curr Top Microbiol Immunol.*  
771 2005;288:43-70.
- 772 31. Donnelly MLL, Luke G, Mehrotra A, Li XJ, Hughes LE, Gani D, Ryan MD. Analysis of the  
773 aphthovirus 2A/2B polyprotein 'cleavage' mechanism indicates not a proteolytic reaction, but a  
774 novel translational effect: a putative ribosomal 'skip'. *Journal of General Virology.*  
775 2001;82:1013-25.
- 776 32. Doronina VA, Wu C, de Felipe P, Sachs MS, Ryan MD, Brown JD. Site-specific release of  
777 nascent chains from ribosomes at a sense codon. *Mol Cell Biol.* 2008;28(13):4227-39.

- 778 33. Ryan MD, Donnelly M, Lewis A, Mehrotra AP, Wilkie J, Gani D. A model for  
779 nonstoichiometric, cotranslational protein scission in eukaryotic ribosomes. *Bioorganic*  
780 *Chemistry*. 1999;27(1):55-79.
- 781 34. Ryan MD, King AM, Thomas GP. Cleavage of foot-and-mouth disease virus polyprotein is  
782 mediated by residues located within a 19 amino acid sequence. *J Gen Virol*. 1991;72 ( Pt  
783 11):2727-32.
- 784 35. Jackson RJ, Howell MT, Kaminski A. The novel mechanism of initiation of picornavirus  
785 RNA translation. *Trends Biochem Sci*. 1990;15(12):477-83.
- 786 36. McKnight KL, Lemon SM. The rhinovirus type 14 genome contains an internally located  
787 RNA structure that is required for viral replication. *RNA*. 1998;4(12):1569-84.
- 788 37. Burrill CP, Westesson O, Schulte MB, Strings VR, Segal M, Andino R. Global RNA  
789 structure analysis of poliovirus identifies a conserved RNA structure involved in viral replication  
790 and infectivity. *J Virol*. 2013;87(21):11670-83.
- 791 38. Song Y, Liu Y, Ward CB, Mueller S, Fitcher B, Skiena S, Paul AV, Wimmer E. Identification  
792 of two functionally redundant RNA elements in the coding sequence of poliovirus using  
793 computer-generated design. *Proc Natl Acad Sci U S A*. 2012;109(36):14301-7.
- 794 39. Rieder E, Paul AV, Kim DW, van Boom JH, Wimmer E. Genetic and biochemical studies of  
795 poliovirus cis-acting replication element cre in relation to VPg uridylylation. *J Virol*.  
796 2000;74(22):10371-80.
- 797 40. Kloc A, Rai DK, Rieder E. The Roles of Picornavirus Untranslated Regions in Infection and  
798 Innate Immunity. *Front Microbiol*. 2018;9:485.

- 799 41. Clarke BE, Brown AL, Currey KM, Newton SE, Rowlands DJ, Carroll AR. Potential  
800 Secondary and Tertiary Structure in the Genomic Rna of Foot-and-Mouth-Disease Virus. *Nucleic*  
801 *Acids Research*. 1987;15(17):7067-79.
- 802 42. Kloc A, Diaz-San Segundo F, Schafer EA, Rai DK, Kenney M, de Los Santos T, Rieder E.  
803 Foot-and-mouth disease virus 5'-terminal S fragment is required for replication and modulation  
804 of the innate immune response in host cells. *Virology*. 2017;512:132-43.
- 805 43. Serrano P, Pulido MR, Saiz M, Martinez-Salas E. The 3' end of the foot-and-mouth  
806 disease virus genome establishes two distinct long-range RNA-RNA interactions with the 5' end  
807 region. *J Gen Virol*. 2006;87(Pt 10):3013-22.
- 808 44. Newton SE, Carroll AR, Campbell RO, Clarke BE, Rowlands DJ. The sequence of foot-and-  
809 mouth disease virus RNA to the 5' side of the poly(C) tract. *Gene*. 1985;40(2-3):331-6.
- 810 45. Lasecka-Dykes L, Wright CF, Di Nardo A, Logan G, Mioulet V, Jackson T, Tuthill TJ,  
811 Knowles NJ, King DP. Full Genome Sequencing Reveals New Southern African Territories  
812 Genotypes Bringing Us Closer to Understanding True Variability of Foot-and-Mouth Disease  
813 Virus in Africa. *Viruses-Basel*. 2018;10(4).
- 814 46. Zhu Z, Yang F, Cao W, Liu H, Zhang K, Tian H, Dang W, He J, Guo J, Liu X, Zheng H. The  
815 Pseudoknot Region of the 5' Untranslated Region Is a Determinant of Viral Tropism and  
816 Virulence of Foot-and-Mouth Disease Virus. *J Virol*. 2019;93(8).
- 817 47. Ward JC, Lasecka-Dykes L, Neil C, Adeyemi O, Gold S, McLean N, Wright CF, Herod MR,  
818 Kealy D, Warner E, King DP, Tuthill TJ, Rowlands DJ, Stonehouse NJ. The RNA pseudoknots in  
819 foot-and-mouth disease virus are dispensable for genome replication but essential for the  
820 production of infectious virus2020.



- 821 48. Lopez de Quinto S, Martinez-Salas E. Conserved structural motifs located in distal loops  
822 of aphthovirus internal ribosome entry site domain 3 are required for internal initiation of  
823 translation. *J Virol.* 1997;71(5):4171-5.
- 824 49. Belsham GJ, Brangwyn JK. A region of the 5' noncoding region of foot-and-mouth  
825 disease virus RNA directs efficient internal initiation of protein synthesis within cells:  
826 involvement with the role of L protease in translational control. *J Virol.* 1990;64(11):5389-95.
- 827 50. Kuhn R, Luz N, Beck E. Functional analysis of the internal translation initiation site of  
828 foot-and-mouth disease virus. *J Virol.* 1990;64(10):4625-31.
- 829 51. Serrano P, Ramajo J, Martinez-Salas E. Rescue of internal initiation of translation by RNA  
830 complementation provides evidence for a distribution of functions between individual IRES  
831 domains. *Virology.* 2009;388(1):221-9.
- 832 52. Mason PW, Bezborodova SV, Henry TM. Identification and characterization of a cis-  
833 acting replication element (cre) adjacent to the internal ribosome entry site of foot-and-mouth  
834 disease virus. *J Virol.* 2002;76(19):9686-94.
- 835 53. Nayak A, Goodfellow IG, Belsham GJ. Factors required for the Uridylylation of the foot-  
836 and-mouth disease virus 3B1, 3B2, and 3B3 peptides by the RNA-dependent RNA polymerase  
837 (3Dpol) in vitro. *J Virol.* 2005;79(12):7698-706.
- 838 54. Saiz M, Gomez S, Martinez-Salas E, Sobrino F. Deletion or substitution of the  
839 aphthovirus 3' NCR abrogates infectivity and virus replication. *J Gen Virol.* 2001;82(Pt 1):93-101.
- 840 55. Pulido MR, Sobrino F, Borrego B, Saiz M. Attenuated Foot-and-Mouth Disease Virus RNA  
841 Carrying a Deletion in the 3' Noncoding Region Can Elicit Immunity in Swine. *Journal of*  
842 *Virology.* 2009;83(8):3475-85.

- 843 56. Logan G, Newman J, Wright CF, Lasecka-Dykes L, Haydon DT, Cottam EM, Tuthill TJ.  
844 Deep Sequencing of Foot-and-Mouth Disease Virus Reveals RNA Sequences Involved in Genome  
845 Packaging. *Journal of Virology*. 2018;92(1).
- 846 57. Simmonds P, Tuplin A, Evans DJ. Detection of genome-scale ordered RNA structure  
847 (GORS) in genomes of positive-stranded RNA viruses: Implications for virus evolution and host  
848 persistence. *RNA*. 2004;10(9):1337-51.
- 849 58. Rivas E, Eddy SR. Secondary structure alone is generally not statistically significant for  
850 the detection of noncoding RNAs. *Bioinformatics*. 2000;16(7):583-605.
- 851 59. Workman C, Krogh A. No evidence that mRNAs have lower folding free energies than  
852 random sequences with the same dinucleotide distribution. *Nucleic Acids Res*.  
853 1999;27(24):4816-22.
- 854 60. Davis M, Sagan SM, Pezacki JP, Evans DJ, Simmonds P. Bioinformatic and physical  
855 characterizations of genome-scale ordered RNA structure in mammalian RNA viruses. *J Virol*.  
856 2008;82(23):11824-36.
- 857 61. Simmonds P. SSE: a nucleotide and amino acid sequence analysis platform. *BMC Res*  
858 *Notes*. 2012;5:50.
- 859 62. Lorenz R, Bernhart SH, Honer Zu Siederdisen C, Tafer H, Flamm C, Stadler PF, Hofacker  
860 IL. ViennaRNA Package 2.0. *Algorithms Mol Biol*. 2011;6:26.
- 861 63. Tulloch F, Pathania U, Luke GA, Nicholson J, Stonehouse NJ, Rowlands DJ, Jackson T,  
862 Tuthill T, Haas J, Lamond AI, Ryan MD. FMDV replicons encoding green fluorescent protein are  
863 replication competent. *J Virol Methods*. 2014;209:35-40.

- 864 64. Hoechsmann M, Toeller T, Giegerich R, Kurtz S, editors. Local Similarity of RNA  
865 Secondary Structures. IEEE Bioinformatics Conference (CSB 2003); 2003.
- 866 65. Jiang T, Wang LS, Zhang KZ. Alignment of Trees - an Alternative to Tree Edit. Theor  
867 Comput Sci. 1995;143(1):137-48.
- 868 66. Herod MR, Loundras EA, Ward JC, Tulloch F, Rowlands DJ, Stonehouse NJ. Employing  
869 transposon mutagenesis to investigate foot-and-mouth disease virus replication. J Gen Virol.  
870 2015;96(12):3507-18.
- 871 67. Simmonds P, Cuypers L, Irving WL, McLauchlan J, Cooke GS, Barnes E, Consortium S-H,  
872 Ansari MA. Impact of virus subtype and host IFNL4 genotype on large-scale RNA structure  
873 formation in the genome of hepatitis C virus. RNA. 2020;26(11):1541-56.
- 874 68. Pirakitikulr N, Kohlway A, Lindenbach BD, Pyle AM. The Coding Region of the HCV  
875 Genome Contains a Network of Regulatory RNA Structures. Mol Cell. 2016;62(1):111-20.
- 876 69. Mauger DM, Golden M, Yamane D, Williford S, Lemon SM, Martin DP, Weeks KM.  
877 Functionally conserved architecture of hepatitis C virus RNA genomes. Proc Natl Acad Sci U S A.  
878 2015;112(12):3692-7.
- 879 70. Luna VER, Luk ADH, Tyring SK, Hellman JM, Lefkowitz SS. Properties of Bovine  
880 Interferons. Experientia. 1984;40(12):1410-2.
- 881 71. Conzelmann KK. Reverse genetics of Mononegavirales. Curr Top Microbiol. 2004;283:1-  
882 41.
- 883 72. Schlender J, Bossert B, Buchholz U, Conzelmann KK. Bovine respiratory syncytial virus  
884 nonstructural proteins NS1 and NS2 cooperatively antagonize alpha/beta interferon-induced  
885 antiviral response. J Virol. 2000;74(18):8234-42.

- 886 73. Witteveldt J, Blundell R, Maarleveld JJ, McFadden N, Evans DJ, Simmonds P. The  
887 influence of viral RNA secondary structure on interactions with innate host cell defences.  
888 *Nucleic Acids Research*. 2014;42(5):3314-29.
- 889 74. Smyth RP, Negroni M, Lever AM, Mak J, Kenyon JC. RNA Structure-A Neglected Puppet  
890 Master for the Evolution of Virus and Host Immunity. *Front Immunol*. 2018;9:2097.
- 891 75. Zhang ZD, Alexandersen S. Quantitative analysis of foot-and-mouth disease virus RNA  
892 loads in bovine tissues: implications for the site of viral persistence. *Journal of General Virology*.  
893 2004;85:2567-75.
- 894 76. Condy JB, Hedger RS, Hamblin C, Barnett IT. The duration of the foot-and-mouth disease  
895 virus carrier state in African buffalo (i) in the individual animal and (ii) in a free-living herd.  
896 *Comp Immunol Microbiol Infect Dis*. 1985;8(3-4):259-65.
- 897 77. Vosloo W, Dwarka RM, Bastos ADS, Esterhuysen JJ, Sahle M, Sangare O. Molecular  
898 epidemiological studies of foot-and-mouth disease virus in sub-Saharan Africa indicate the  
899 presence of large numbers of topotypes: implications for local and international control. . 2004.
- 900 78. Vosloo W, de Klerk LM, Boshoff CI, Botha B, Dwarka RM, Keet D, Haydon DT.  
901 Characterisation of a SAT-1 outbreak of foot-and-mouth disease in captive African buffalo  
902 (*Syncerus caffer*): clinical symptoms, genetic characterisation and phylogenetic comparison of  
903 outbreak isolates. *Vet Microbiol*. 2007;120(3-4):226-40.
- 904 79. Thomson GR, Vosloo W, Esterhuysen JJ, Bengis RG. Maintenance of foot and mouth  
905 disease viruses in buffalo (*Syncerus caffer* Sparrman, 1779) in southern Africa. *Rev Sci Tech*.  
906 1992;11(4):1097-107.

- 907 80. Spratt BG. Independent Review of the safety of UK facilities handling foot-and-mouth  
908 disease virus. Presented to the Secretary of State for Environment FaRAatCVO; 2007.
- 909 81. Callaghan B. A review of the regulatory framework for handling animal pathogens.  
910 Presented to the Secretary of State for Environment FaRA; 2007.
- 911 82. Sangula AK, Siegismund HR, Belsham GJ, Balinda SN, Masembe C, Muwanika VB. Low  
912 diversity of foot-and-mouth disease serotype C virus in Kenya: evidence for probable vaccine  
913 strain re-introductions in the field. *Epidemiol Infect.* 2011;139(2):189-96.
- 914 83. Runckel C, Westesson O, Andino R, DeRisi JL. Identification and manipulation of the  
915 molecular determinants influencing poliovirus recombination. *PLoS Pathog.*  
916 2013;9(2):e1003164.
- 917 84. Katoh K, Toh H. Improved accuracy of multiple ncRNA alignment by incorporating  
918 structural information into a MAFFT-based framework. *BMC Bioinformatics.* 2008;9:212.
- 919 85. Katoh K, Asimenos G, Toh H. Multiple alignment of DNA sequences with MAFFT.  
920 *Methods Mol Biol.* 2009;537:39-64.
- 921 86. Kerpedjiev P, Hammer S, Hofacker IL. Forna (force-directed RNA): Simple and effective  
922 online RNA secondary structure diagrams. *Bioinformatics.* 2015;31(20):3377-9.
- 923 87. Schneider TD, Stephens RM. Sequence logos: a new way to display consensus  
924 sequences. *Nucleic Acids Res.* 1990;18(20):6097-100.
- 925 88. Crooks GE, Hon G, Chandonia JM, Brenner SE. WebLogo: a sequence logo generator.  
926 *Genome Res.* 2004;14(6):1188-90.

- 927 89. Madeira F, Park YM, Lee J, Buso N, Gur T, Madhusoodanan N, Basutkar P, Tivey ARN,  
928 Potter SC, Finn RD, Lopez R. The EMBL-EBI search and sequence analysis tools APIs in 2019.  
929 Nucleic Acids Res. 2019;47(W1):W636-W41.
- 930 90. Katoh K, Kuma K, Toh H, Miyata T. MAFFT version 5: improvement in accuracy of  
931 multiple sequence alignment. Nucleic Acids Res. 2005;33(2):511-8.
- 932 91. Zuker M. Mfold web server for nucleic acid folding and hybridization prediction. Nucleic  
933 Acids Res. 2003;31(13):3406-15.
- 934
- 935

936

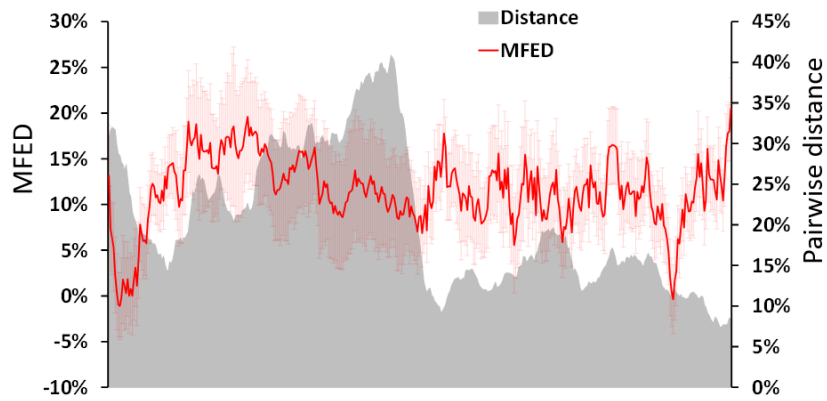

942

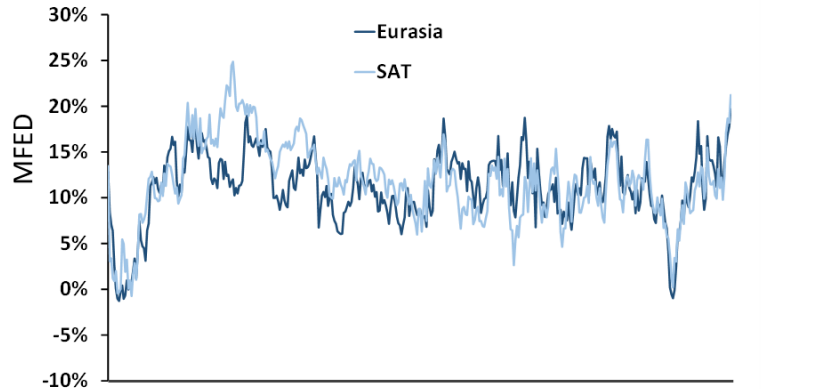

948

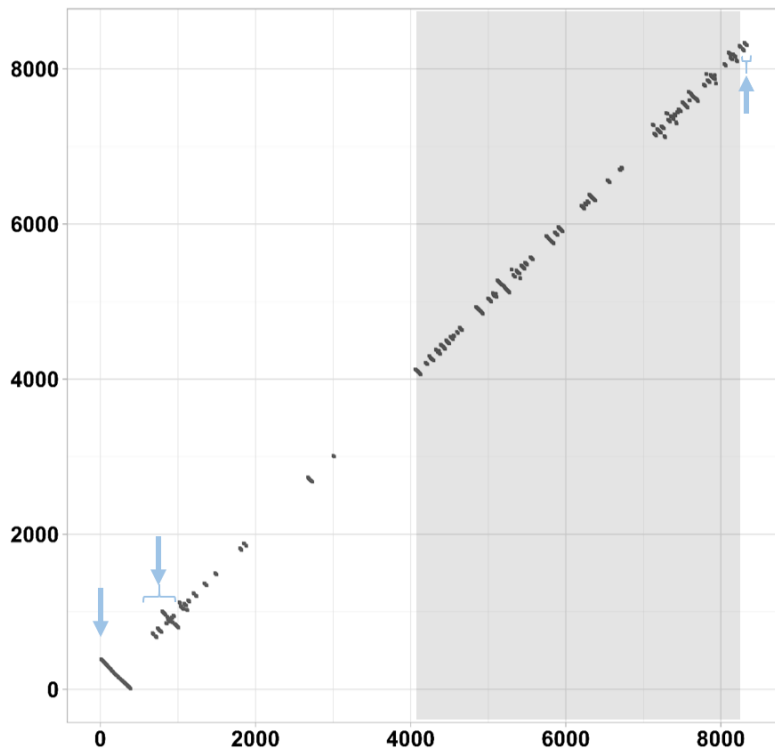

958

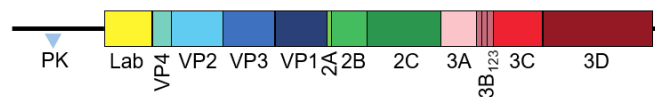

960 **Figure 1.** Extent of the conserved RNA secondary structures within representative FMDV genomic  
961 sequences (n=118). Upper panel shows a scan of pairwise distance and mean folding energies  
962 difference (MFED) prepared using SSE v1.4 software. The mean values for successive 400 nt  
963 fragments across the genome are plotted (where each 400 nts segments overlapped its neighbours  
964 by 380 nts). The light red shading represents error bars showing standard deviation from the mean  
965 for each datapoint. The middle panel shows MFED values for the same FMDV genomic sequences but  
966 grouped into Eurasian (A, Asia 1, C and O serotypes) or SAT (SAT 1 - 3 serotypes) clusters. The lower  
967 panel shows a dot plot graphical representation of RNA structures that were conserved across all  
968 seven FMDV serotypes. The x-axis and y-axis represent FMDV genome positions, with each dot  
969 representing a single pairing between two nucleotides, one with its position marked on the x-axis and  
the other one with its position marked on the y-axis. The three pale blue arrows indicate location of  
the S-fragment, cre+IRES and SL1+SL2 structures on the dot plot graph, respectively (for a detailed  
visualisation of these structures see Fig. S1). The blue tringle marked PK indicates the genomic region  
containing pseudoknot structures which was excluded from these analyses. The area corresponding  
to the regions encoding the non-structural proteins (i.e., P2 and P3) is highlighted in grey and for  
clarity, a schematic representation of the FMDV genome is drawn to scale.



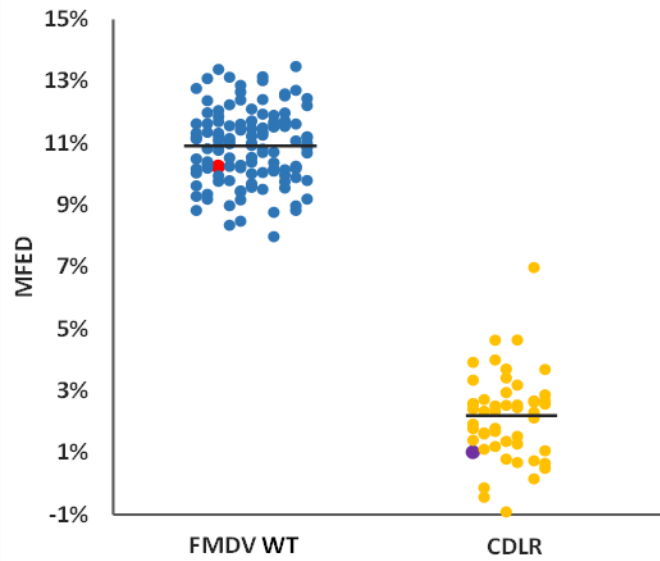

970

971 **Figure 2.** Comparison of average MFED values for wild type (WT) and CDLR-scrambled sequences. Mean  
972 folding energy difference (MFED) for the regions encoding non-structural proteins (nsps) of 118 FMDV  
973 field isolates representing all seven serotypes (blue dots), WT ptGFP replicon used in the study (red dot)  
974 and CDLR scrambled sequences (yellow dots). Among the latter is the CDLR scrambled sequence used in  
975 this study to generate replicon mutants (purple dot). To obtain CDLR-scrambled sequences the sequence  
976 of the regions encoding the nsps of the WT replicon was permuted 50 times by codon-shuffling to  
977 minimise RNA secondary structure, while preserving protein coding, native dinucleotide frequencies,  
978 and codon usage.

979

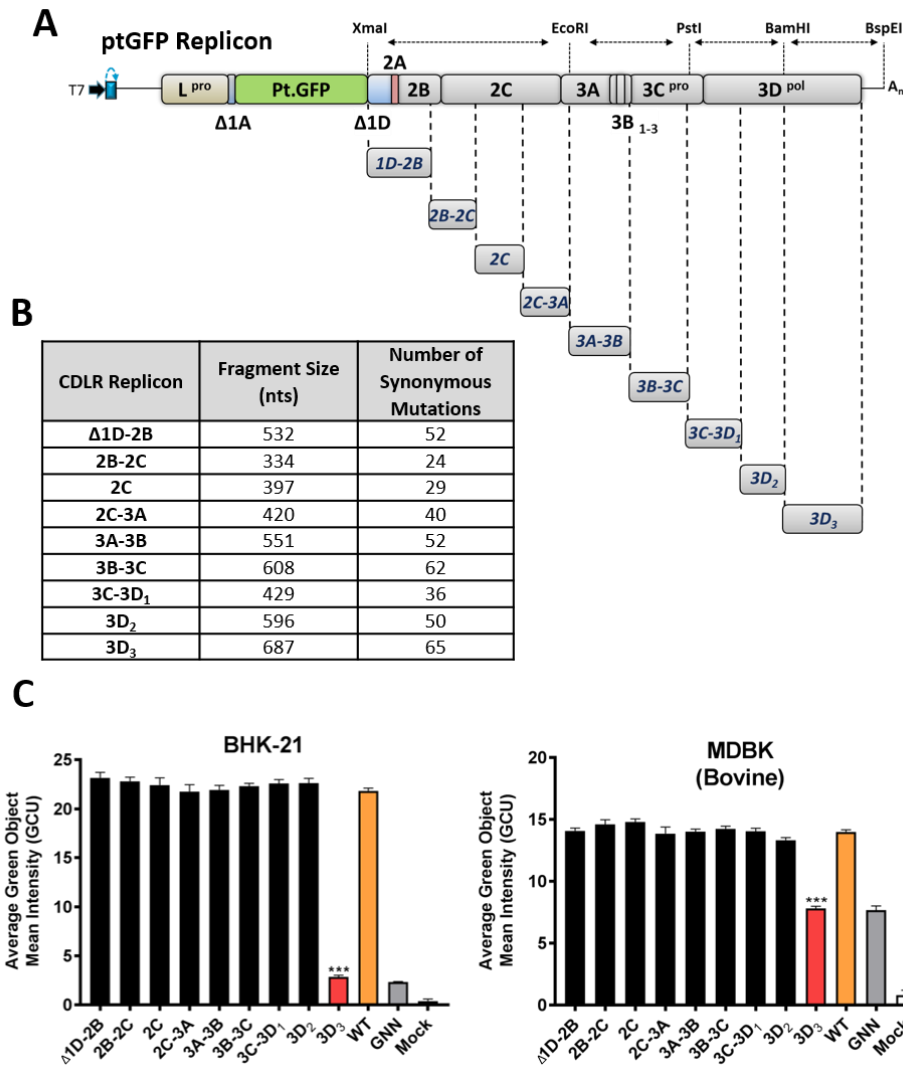

980

981 **Figure 3.** Replication of CDLR replicons within BHK-21 and MDBK cells. **(A)** Schematic representation of  
 982 CDLR replicons. Mutated regions were firstly inserted into a sub-clone encoding the non-structural  
 983 proteins (nsps) of the genome ( $\Delta$ 1D-polyA) before cloning into the WT ptGFP replicon using the unique  
 984 restriction enzymes shown. **(B)** CDLR replicon insert sizes and number of mutations within each region.  
 985 Regions were chosen based on restriction site usage within the regions encoding nsps. Mutations were  
 986 introduced as described within the materials and methods section. **(C)** IncuCyte data represent the  
 987 average cell (green object) GFP intensity per well at 8 h post-transfection. Results are the mean of three  
 988 independent experiments  $\pm$  standard error. Significant differences between WT ptGFP and CDLR  
 989 replicons were determined (\*\*\*,  $P < 0.001$ ). The replication-incompetent 3Dpol active site mutant (GDD  
 990  $\rightarrow$  GNN) ptGFP-3DpolGNN was used as a negative control.

991

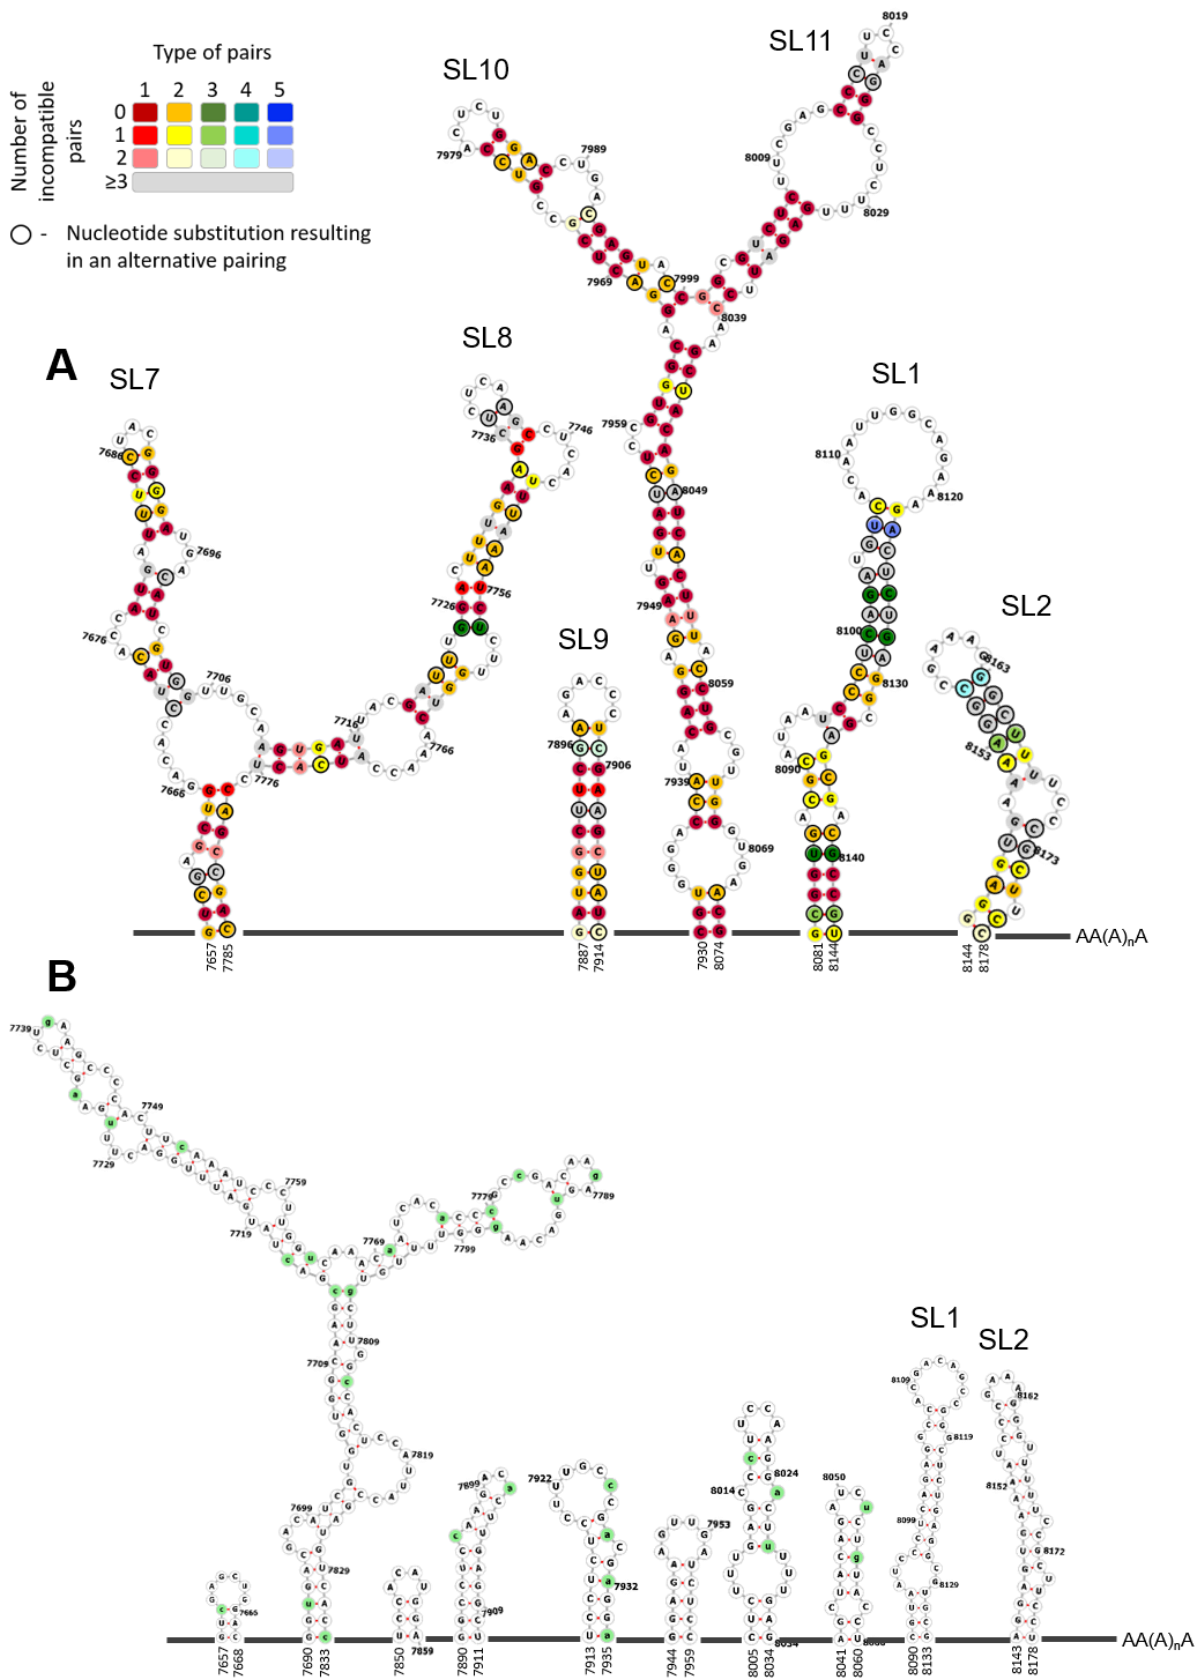

993 **Figure 4.** Schematic representation of predicted conserved RNA structures located at the 3' terminal end  
994 of the region encoding 3Dpol. (A) Schematic representation of conserved (in all FMDV serotypes) RNA  
995 secondary structures located at the 3' terminal end of the region encoding 3Dpol (i.e., the 3D3 region  
996 described in Fig. 3). Conserved putative stem-loops (SL7 – SL11) are shown, where two stem-loops  
997 located in the 3' UTR described before (SL1 and SL2) act as the control of the computational prediction.  
998 Nucleotide positions which form conserved pairing were colour-coded according to number of pairing  
999 types ('red = 1' to 'blue = 5') and conservation of a pairing ('dark shades = nucleotide pairing occurred in  
1000 all FMDV isolates' to 'light shades = lack of nucleotide pairing in two FMDV isolates'). Positions coloured  
1001 in light grey show lack of pairing for three or more FMDV isolates. Black circular outline indicates  
1002 nucleotide position where a substitution resulted in an alternative pairing (see included legend for  
1003 detail). Unstructured regions are represented as dark grey lines and are not drawn to scale. Numbers  
1004 represent nucleotide positions corresponding to the sequence of A/Brazil/1979 isolate (GenBank  
1005 accession number AY593788). Supplementary Table S1 specifies details represented graphically in the  
1006 figure legend. (B) Schematic representation of RNA secondary structures located in the 3D3 region after  
1007 scrambling using the CDLR algorithm, demonstrating how RNA secondary structure in this region was  
1008 changed. Mutated nucleotide positions are highlighted in green. Unstructured regions are represented  
1009 as dark grey lines and are not drawn to scale. Numbers represent nucleotide positions corresponding to  
1010 the sequence of the A/Brazil/1979 isolate.

1011

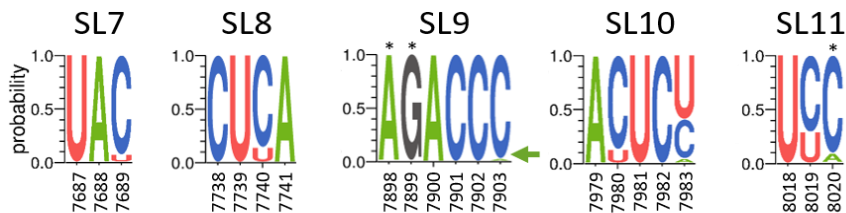

1012

1013 **Figure 5.** Extent of nucleotide conservation within hairpin loops of SL7 - SL11 RNA structures. Sequence  
1014 logos were prepared using WebLogo 3.7.4 web server based on sequences of 118 FMDV isolates.  
1015 Probability shows the extent of nucleotide occurrence at a given position. Numbers represent  
1016 nucleotide positions corresponding to the sequence of A/Brazil/1979 isolate (GenBank accession  
1017 number AY593788). Asterix (\*) marks positions where substitution occurs in 1 out of 118 FMDV isolates  
1018 but due to limited resolution of the y axis it does not appear in the sequence logos (these are: A7898G,  
1019 G7899A and C8020G). The green arrow points to C7903A substitution which due to height of A symbol  
1020 could go unnoticed.

1021

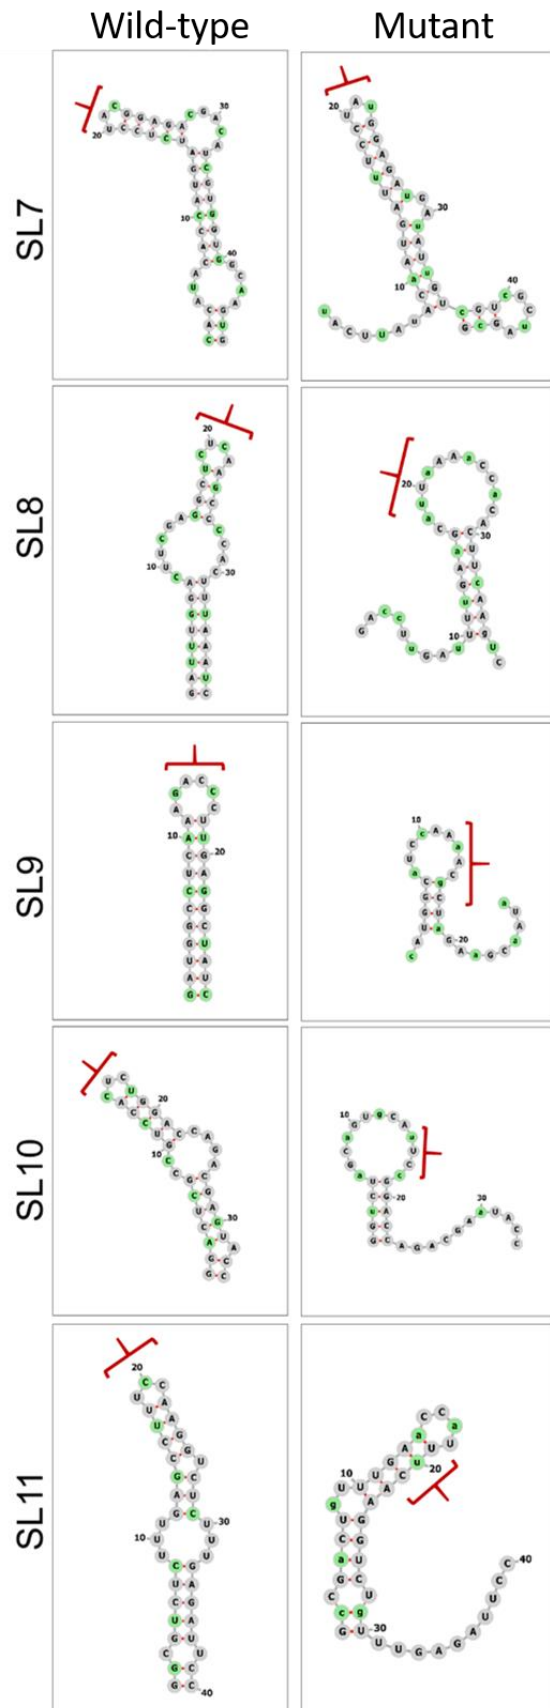

1023 **Figure 6.** Disruption of the predicted RNA secondary structures by silent mutagenesis. The conserved  
1024 stem-loops identified in the 3' terminal end of the region encoding 3D<sup>pol</sup> (i.e., 3D<sub>3</sub>) of FMDV were  
1025 predicted individually by Mfold for the WT ptGFP replicon. Predicted WT stem-loops were mutated to  
1026 cause the highest possible disruption or change to the RNA structure without affecting neighbouring  
1027 stem-loops, while keeping the same amino acid sequence and dinucleotide ratio (i.e., CpG and UpA).  
1028 Predicted WT and mutated stem-loops visualised in Forna web server are shown. Nucleotides  
1029 highlighted in green represent mutated positions, while red brackets represent positions of the hairpin  
1030 loop in the WT structures and their altered position in the disrupted structures after mutagenesis.

1031

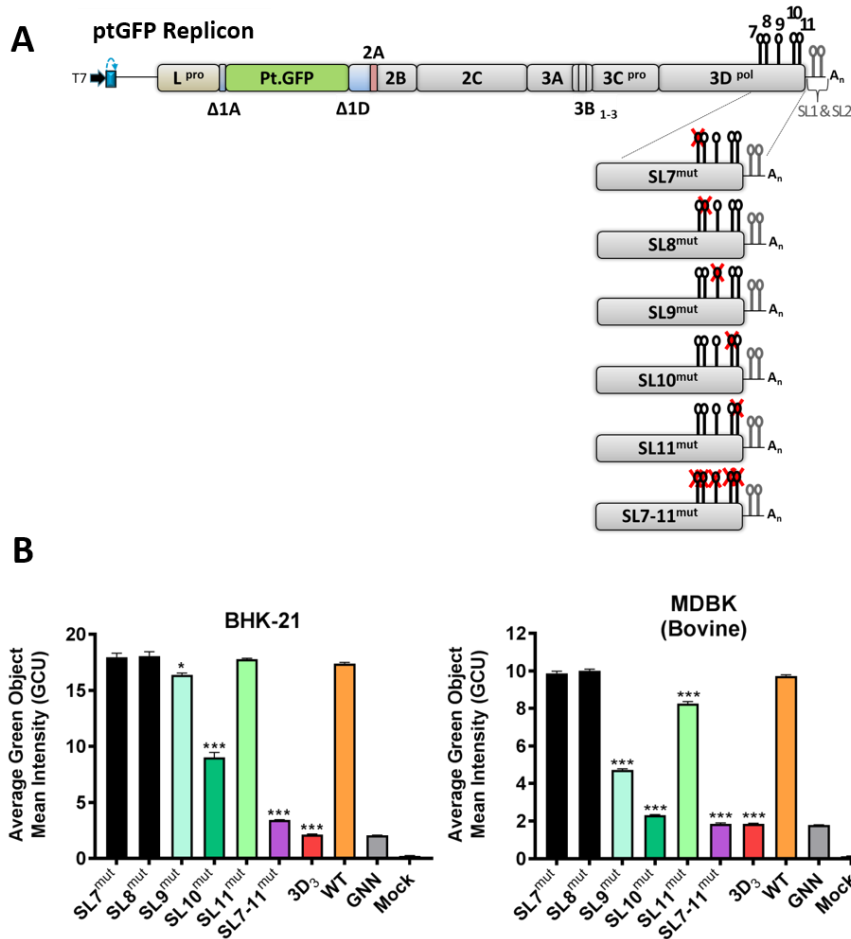

1032

1033 **Figure 7.** Effect of individual stem-loop (SL7 - SL11) mutagenesis on replication of the FMDV replicon. **(A)**  
 1034 Schematic representation of FMDV replicon constructs containing stem-loop mutations (SL9<sup>mut</sup> –  
 1035 SL11<sup>mut</sup>). Sequence inserts containing stem-loop mutations were cloned directly into the ptGFP replicon  
 1036 using the unique restriction enzymes BamHI and BspEI. **(B)** IncuCyte data represent the average cell  
 1037 (green object) GFP intensity per well at 8 h post-transfection within BHK-21 and MDBK cells. Results are  
 1038 the mean of three independent experiments  $\pm$  standard error. Significant differences between WT ptGFP  
 1039 and SL<sup>mut</sup> replicons were determined (\*,  $P < 0.05$ ; \*\*\*,  $P < 0.001$ ).

1040



A

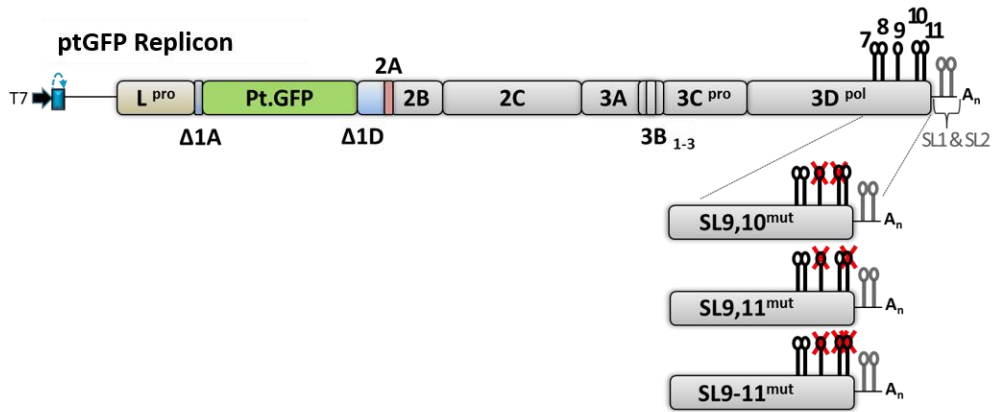

B

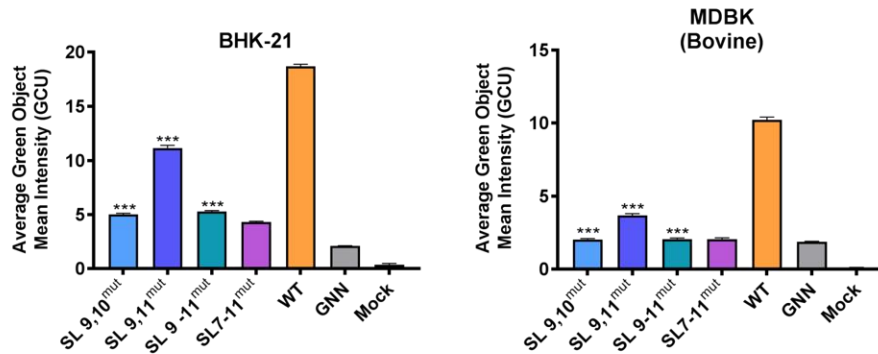

1041

1042 **Figure 8.** Effect of combined mutagenesis of stem-loops 9, 10 and 11 on replication of the FMDV  
 1043 replicon. **(A)** Schematic representation of FMDV replicon constructs containing combined stem-loop  
 1044 mutations (SL9,10<sup>mut</sup>, SL9,11<sup>mut</sup> and SL9-11<sup>mut</sup>). Sequence inserts containing stem-loop mutations were  
 1045 cloned directly into the ptGFP replicon using the unique restriction enzymes BamHI and BspEI. **(B)**  
 1046 IncuCyte data represent the average cell (green object) GFP intensity per well at 8 h post-transfection.  
 1047 Results are the mean of three independent experiments  $\pm$  standard error. Significant differences  
 1048 between WT ptGFP and SL<sup>mut</sup> replicons were determined (\*\*\*,  $P < 0.001$ ).

1049
