1 **Mutagenesis Mapping of RNA Structures within the Foot-and-Mouth Disease**  
2 **Virus Genome Reveals Functional Elements Localised in the Polymerase (3D<sup>pol</sup>)**  
3 **Encoding Region.**

4 Lidia Lasecka-Dykes<sup>a,\*,#</sup>, Fiona Tulloch<sup>b,\*</sup>, Peter Simmonds<sup>c</sup>, Garry A. Luke<sup>b</sup>, Paolo  
5 Ribeca<sup>a,\*</sup>, Sarah Gold<sup>a</sup>, Nick J. Knowles<sup>a</sup>, Caroline F. Wright<sup>a</sup>, Jemma Wadsworth<sup>a</sup>,  
6 Mehreen Azhar<sup>a</sup>, Donald P. King<sup>a</sup>, Tobias J. Tuthill<sup>a</sup>, Terry Jackson<sup>a</sup>, Martin D. Ryan<sup>b,#</sup>

7 <sup>a</sup>The Pirbright Institute, Pirbright, Surrey, United Kingdom.

8 <sup>b</sup>Biomedical Sciences Research Complex (BSRC), School of Biology, University of St.  
9 Andrews, St. Andrews, United Kingdom.

10 <sup>c</sup>Nuffield Department of Experimental Medicine, University of Oxford, Oxford, United  
11 Kingdom.

12

13 Running Head: Novel functional RNA structures within the FMDV genome

14

15 #Address correspondence to Lidia Lasecka-Dykes, [lidia.dykes@pirbright.ac.uk](mailto:lidia.dykes@pirbright.ac.uk) and  
16 Martin D. Ryan, [mdr1@st-andrews.ac.uk](mailto:mdr1@st-andrews.ac.uk)

17 \*Present address: Fiona Tulloch, Benchmark Animal Health, Edinburgh, Scotland,  
18 United Kingdom; Paolo Ribeca, Biomathematics and Statistics Scotland, Edinburgh,  
19 Scotland, United Kingdom.

20 †Lidia Lasecka-Dykes and Fiona Tulloch contributed equally to this work. Author order

21 was agreed upon by all authors.

22

23 Abstract: 250 words

24 Importance: 150 words

25 Text: 4,589 words

26 **ABSTRACT**

27 **Abstract:** RNA structure plays a crucial role in the replication of positive sense RNA  
28 viruses and can form functional elements within the untranslated regions (UTRs) and  
29 the protein coding sequences (or open reading frames (ORFs)). While RNA structures  
30 in the UTRs of several picornaviruses have been functionally characterised, the roles of  
31 putative RNA structures predicted for the ORF remain largely undefined. Here we have  
32 undertaken a bioinformatic analysis of the foot-and-mouth disease virus (FMDV)  
33 genome and predicted the existence of 53 evolutionarily conserved RNA structures  
34 within the ORF. Forty-five (45) of these structures were located in the regions encoding  
35 the non-structural proteins (nsps). To investigate if the structures in the regions  
36 encoding the nsps are required for FMDV replication we used a mutagenesis method,  
37 CDLR mapping, where sequential coding segments were shuffled to minimise RNA  
38 secondary structures while preserving protein coding, native dinucleotide frequencies  
39 and codon usage. To examine the impact of these changes on replicative fitness,  
40 mutated sequences were inserted into an FMDV sub-genomic replicon. We found that  
41 three of the RNA structures, all at the 3' termini of the FMDV ORF, were critical for  
42 replicon replication. Contrastingly, disruption of the other 42 conserved RNA structures  
43 that lie within the regions encoding the nsps had no effect on replicon replication,  
44 suggesting that these structures are not required for initiating translation or replication of  
45 viral RNA. Conserved RNA structures that are not essential for virus replication could  
46 provide ideal targets for the rational attenuation of a wide range of FMDV strains.

47 **Importance:** Some RNA structures formed by the genomes of RNA viruses are critical  
48 for viral replication. Our study shows that of 45 conserved RNA structures located within

49 the regions of the foot-and-mouth disease virus (FMDV) genome that encode the non-  
50 structural proteins, only three are essential for replication of an FMDV sub-genomic  
51 replicon. Replicons replication is dependent on RNA translation and synthesis; thus,  
52 our results suggest that the three RNA structures are critical for either initiation of viral  
53 RNA translation and/or viral RNA synthesis. Although further studies are required to  
54 identify if the remaining 42 RNA structures have other roles in virus replication, they  
55 may provide targets for the rational large-scale attenuation of a wide range of FMDV  
56 strains. FMDV causes a highly contagious disease posing a constant threat to global  
57 livestock industries. Such weakened FMDV strains could be investigated as live-  
58 attenuated vaccines or could enhance biosecurity of conventional inactivated vaccine  
59 production.

60

## 61 INTRODUCTION

62           The genomes of RNA viruses not only encode proteins but also contain non-  
63 templated functional elements in both the coding and untranslated regions (UTRs).  
64 These can be secondary or higher order RNA structures such as simple stem-loops or  
65 more complex structures which include pseudoknots and so-called kissing-loops that  
66 mediate long-range RNA-RNA interactions (1-12) . The function, shape and number of  
67 such RNA functional elements is often characteristic for a particular group of viruses,  
68 where they play important roles in processes such as the initiation of viral RNA  
69 translation and replication, subgenomic mRNA transcription, frame shift events, viral  
70 RNA encapsidation and modulation of host's antiviral responses (reviewed in (13)).  
71 Since many RNA viruses are of medical and veterinary importance, characterisation of  
72 these RNA structures brings us closer to understanding viral pathogenicity and provides  
73 opportunities for disease control.

74           Foot-and-mouth disease virus (FMDV) is the causative agent of foot-and-mouth  
75 disease (FMD), a highly contagious disease of cloven-hoofed animals (including  
76 livestock) (reviewed in (14)). FMD is endemic in Africa and Asia, where it impacts upon  
77 productivity and trade as well as posing a constant threat of causing costly incursions  
78 into disease-free countries (15-21). Control of FMD by vaccination in endemic settings is  
79 complicated by the high antigenic variability of the seven serotypes of FMDV: A, Asia 1,  
80 C (not reported since 2004), O, Southern African Territories (SAT) 1, SAT 2 and SAT 3  
81 (19, 20, 22-24).

82 FMDV is a small non-enveloped positive-sense single-stranded RNA virus  
83 classified in the species *Foot-and-mouth disease virus*, genus *Aphthovirus* in the family  
84 *Picornaviridae*. The FMDV genome is ~ 8.5 Kb in size and composes of a single, long  
85 open reading frame (ORF) which is flanked by 5' and 3' UTRs (reviewed in (25)). The  
86 encoded polyprotein is co- and post-translationally cleaved by viral proteases (L<sup>pro</sup> and  
87 3C<sup>pro</sup>) and by a ribosomal skipping event mediated by the 2A peptide into a number of  
88 functional precursors and the mature proteins (26-34). The coding sequence for the  
89 FMDV ORF is arbitrarily divided into four regions (5'-L<sup>pro</sup>, P1, P2 and P3-3'). The P1  
90 region encodes the capsid proteins (1A, 1B, 1C and 1D, also called VP4, VP2, VP3 and  
91 VP1, respectively), while the P2 and P3 regions encode the non-structural proteins  
92 (nsps) (reviewed in (25)).

93 There are a number of RNA structures within picornavirus genomes that have  
94 been accurately predicted and characterised biochemically (12, 35-39). These  
95 structures are predominantly located in the UTRs and have been shown to be important  
96 for replication and translation of picornavirus genomes (reviewed in (40)). Within the 5'  
97 UTR of the FMDV genome, the S-fragment forms a single, long hairpin structure (293-  
98 381 nucleotides (nts) in length) and has been reported to play a role in viral replication  
99 and innate immune modulation (41-45). Elsewhere in the 5' UTR, the presence of  
100 multiple (2 - 4) pseudoknots downstream of the poly(C) tract has been shown to  
101 determine virus tropism (41, 46). Other key and well-characterised RNA structural  
102 elements include a type II internal ribosome entry site (IRES), which initiates cap-  
103 independent translation of the viral genome (41, 47-50); while the *cis*-acting replication  
104 element (*cre*) acts as a template for uridylylation of the VPg (3B) protein, which then

105 acts as a primer for synthesis of viral RNA (51, 52). The 3' UTR of the FMDV genome is  
106 located upstream of the poly(A) tract and contains two RNA stem-loop structures called  
107 SL1 and SL2. These stem-loops interact non-simultaneously with the S-fragment and  
108 IRES forming long-range interactions that have been shown to be necessary for viral  
109 RNA replication (43, 53, 54).

110 A number of other secondary RNA structures have been predicted  
111 computationally to be present within the FMDV ORF (12). However, with the exception  
112 of packaging signals (55), the role(s) of these structures in the FMDV replication cycle  
113 have not been determined. In this study we have identified 45 evolutionarily conserved  
114 RNA structures within the regions of the FMDV ORF that encode for the nsps.  
115 Mutagenesis of these structures identified three novel RNA stem-loops in the coding  
116 region of the RNA-dependent RNA polymerase (3D<sup>pol</sup>) that are essential for replication  
117 of an FMDV sub-genomic replicon, suggesting that these structures are required for  
118 either initiation of viral RNA translation and/or viral RNA synthesis. In contrast,  
119 mutagenesis of the remaining 42 structures had no effect on replicon replication. This  
120 approach can aid in the identification of critical viral RNA structures required for viral  
121 genome replication, and also help identify conserved RNA structures that are not  
122 essential for virus replication that could provide ideal targets for the rational attenuation  
123 of a wide range of FMDV strains.

## 124 **RESULTS**

125 **Prediction of conserved RNA structures within the FMDV genome.** While  
126 previous studies have provided evidence that the FMDV genome is highly structured

127 with conserved RNA base pairing throughout the coding part of the genome (12, 56),  
128 these studies were conducted on a relatively small dataset. Since the number of full  
129 genome sequences available on public databases has greatly increased in recent years,  
130 before conducting functional studies, we revisited these analyses to predict conserved  
131 RNA stem-loops that were common in 118 representative genomic sequences covering  
132 all FMDV serotypes (see materials and methods section for isolates information).

133 Firstly, average mean folding energy differences (MFED) across whole FMDV  
134 genomes were determined for all viral isolates used in this study. In this method,  
135 conserved minimum free energy (MFE) values were normalised to MFE values of native  
136 sequences that had been scrambled using an NDR algorithm, which preserves the  
137 dinucleotide frequencies of native sequences. This ensures that reported values are not  
138 purely due to G+C or other composition biases (see material and methods for detail)  
139 (57-59). In order to show distribution of the MFED values along the genome, this  
140 analysis employs an incremental sliding window computation with user-defined window  
141 size and increment (60) (in our case 400 and 20 nts, respectively, where each 400 nts  
142 segment overlapped its neighbours by 380 nts). A 400 nts window allowed for detection  
143 of the S-fragment structure, while ignoring potential long-distance RNA-RNA  
144 interactions for which biological significance is hard to verify. Despite the high genomic  
145 sequence diversity across all seven serotypes (20% mean nucleotide pairwise distance  
146 ( $\pm 9\%$  standard deviation (StDev)), with 31% ( $\pm 5\%$  StDev) and 14% ( $\pm 7\%$  StDev)  
147 average pairwise distance in the regions encoding the capsid proteins and the nsps,  
148 respectively), all the FMDV genomes analysed showed high folding energies across  
149 most of their sequence compared to the permuted controls (Fig. 1). This indicates that



150 all FMDV sequences possess a similar extent of sequence order-dependent RNA  
151 secondary structure. To confirm this, full genome sequences were grouped into those of  
152 Eurasian (A, Asia 1, C and O serotypes) and SAT (SAT 1 - 3 serotypes) origin and  
153 average MFED values were determined along the genome for each group. Although we  
154 recognize that the grouping may not completely accommodate the inter-serotypic history  
155 of these viruses (see (45) for details why grouping viruses into SAT and non-SAT  
156 clusters is not always correct), the MFED plots showed similar patterns of high and low  
157 MFED values across the genome. MFED values were better correlated between FMDV  
158 groups in the UTRs and the regions encoding the nsps identifying a potentially greater  
159 degree of RNA structure conservation compared to the more genetically divergent  
160 region encoding the capsid proteins (Fig. 1).

161         The window size used for MFED scanning does not identify individual RNA  
162 structures and only highlights regions with high folding energies (which may contain  
163 dissimilar structures and/or structures located at different positions). Therefore,  
164 RNAalifold program, implemented in The ViennaRNA Package (61), was used to  
165 identify individual conserved RNA stem-loops for the 118 whole genomic sequences  
166 and for individual FMDV serotypes. Stem-loops that were conserved in all seven  
167 serotypes were visualised as a dot plot graph, plotting each nucleotide pairing  
168 (represented by individual dot) against positions of involved nucleotides on the x and y  
169 axes (Fig. 1). Any pairing interactions distanced by more than 400 nts were removed  
170 post analysis. By excluding long-distance interactions post whole genome RNA  
171 structure prediction, we did not ignore the effect they may have on formation of local

172 pairings. RNAalifold cannot predict pseudoknots, and therefore the region directly  
173 downstream of the poly(C) tract was excluded from our analyses (Fig. 1).

174         These analyses correctly predicted the presence of well-characterised RNA  
175 secondary structures in the FMDV genome: the S-fragment, IRES and *cre*, all located in  
176 the 5' UTR, and SL1 and SL2 located in the 3' UTR (Fig. 1 and Fig. S1). It additionally  
177 identified several serotype-specific conserved stem-loops in the region encoding the  
178 capsid proteins, but only four of these were conserved in all seven serotypes. In  
179 contrast, 45 stem-loops (when counting each RNA hairpin individually, even within a  
180 single branched structure) were universally present within the regions encoding the  
181 nsps (Fig. 1, Table 1). Overall, there were 53 highly conserved stem-loops in the ORF of  
182 the FMDV genome that were conserved across all serotypes (Table 1).

183         **Use of CDLR mutagenesis for functional mapping of predicted RNA**  
184 **structures.** Next, we undertook mutagenesis studies to investigate whether any of the  
185 conserved RNA structures identified in the FMDV genome play a functional role in viral  
186 replication. FMDV replicons lack the region encoding the capsid proteins but are  
187 replication competent, demonstrating that there are no RNA elements essential for  
188 translation or replication of viral RNA within the capsid encoding region. Therefore, our  
189 investigation focused on structures located within the regions encoding the nsps of the  
190 replicon. Additionally, the effect on replication of changes incorporated into the replicon  
191 can be analysed in real-time through monitoring of fluorescence from an integrated  
192 green fluorescent protein (GFP) reporter gene that replaced the region encoding the  
193 capsid proteins (62).

194 In order to mutate the conserved RNA structures predicted within the regions  
195 encoding the nsps while maintaining codon composition, codon order and dinucleotide  
196 frequencies of the native WT replicon sequence we applied CDLR scrambling method  
197 (11, 56). To monitor its effectiveness in altering or otherwise disrupting RNA pairing  
198 within the native sequence, sequence of the regions encoding the nsps of WT replicon  
199 was randomly permuted 50 times using the CDLR algorithm. Then, MFED values for  
200 these mutants were calculated as described above and these were compared to MFED  
201 values of the native WT replicon sequence and the corresponding sequences of the 118  
202 FMDV isolates used in this study. Sequences generated by CDLR showed evidence of  
203 severely disrupted RNA secondary structures, with a mean MFED value of 2.2% (StDev  
204  $\pm 1.4\%$ ), compared to a mean value of 10.9% (StDev  $\pm 1.2\%$ ) for the corresponding  
205 regions of the native FMDV sequences and that of the WT FMDV replicon (Fig. 2).

206 To identify functional RNA structures, we divided the regions encoding the nsps  
207 of the WT replicon (ptGFP-replicon) into nine consecutive fragments defined by unique  
208 restriction sites, and individually permuted each fragment using the CDLR algorithm  
209 (Fig. 3A-B). To further verify the extent of changes to the RNA structure introduced by  
210 the CDLR algorithm, we used the RNAforester program implemented in The  
211 ViennaRNA Package (61, 63, 64). This compared the putative structures adopted by the  
212 CDLR-permuted regions (shown in Fig. 3A-B) to the structures located within the  
213 corresponding regions of the WT replicon sequence. RNAforester calculates RNA  
214 secondary structure alignments based on the tree alignment model and quantifies  
215 similarity of structures in question, where the relative similarity score values equal to  
216 one represent two identical structures (61, 63, 64). With the exception of the 2C

217 encoding region, which exhibits some structure similarity between CDLR and WT  
218 replicon (Fig. S2), there was low structural similarity between equivalent WT and CDLR  
219 genomic fragments (Table 2). RNA structures located in the 5' and 3' UTRs were  
220 generally unaffected by any CDLR permutation of the adjacent or more distal regions  
221 encoding the nsps, with the exception of the SL1 stem-loop in the 3' UTR that was  
222 shorter by 11 pairings (Fig. S3).

223 **CDLR replicon mutants reveal regions of secondary structure required for**  
224 **replication of an FMDV replicon.** Next, we examined the effect of RNA structure  
225 disruption on replication of the FMDV replicon using mutant replicons containing CDLR-  
226 permuted sequences over different parts of the regions encoding the nsps. For this we  
227 used two different continuous cell lines known to support FMDV replication (Fig. 3A-B).  
228 The replication kinetics of the mutant replicons was compared to the WT ptGFP-replicon  
229 and a replicon with an inactive polymerase (ptGFP-3D<sup>pol</sup>GNN, previously described in  
230 (65)). Since replication levels at 8 hours post-transfection (hpt) were representative of  
231 the entire experiment (Fig. S4), for simplicity, data for this time point are shown. In both  
232 cell lines (BHK-21 and MDBK, of hamster and bovine origin, respectively), all of the  
233 CDLR mutant replicons tested displayed replication kinetics comparable to the WT  
234 ptGFP-replicon except for the replicon which carried a mutated sequence within the 3'  
235 terminal part of the 3D<sup>pol</sup> encoding region (called 3D<sub>3</sub>, Fig. 3C). The replicon with 3D<sub>3</sub>  
236 mutated encoding region was replication defective in both cell lines, with replication  
237 levels equivalent to the negative control replicon (ptGFP-3D<sup>pol</sup>GNN; Fig. 3C). These  
238 results strongly suggest that this part of the 3D<sup>pol</sup> encoding region contains RNA  
239 structures crucial for replication of the FMDV replicon. Consistent with their inferred

240 location in 3D<sub>3</sub>, CDLR permutation of the entire Δ1D-3A and 3A-3D<sub>2</sub> encoding region  
241 showed little effect on the replication kinetics (Fig. S5).

242 **Modification of individual stem-loops within the 3D<sub>3</sub> region impairs**  
243 **replication of an FMDV replicon.** Our results indicate that the region of the FMDV  
244 genome encoding for the 3' terminal end of 3D<sup>pol</sup> (called here 3D<sub>3</sub>) contains conserved  
245 secondary RNA structures that may be necessary for replication of the FMDV replicon.  
246 Therefore, the RNA structures present in this region were investigated in more detail by  
247 visualising each individual structure and comparing it to the corresponding scrambled  
248 region within the CDLR mutant. Analysis of corresponding sequences of FMDV field  
249 isolates (over the 3D<sub>3</sub> region) revealed five stem-loops (SL7 – SL11) with strong  
250 nucleotide pairing conservation, with SL10 being the most conserved structure (Fig. 4A).  
251 Variability within all structures was accommodated though the occurrence of covariant  
252 changes that preserved nucleotide pairings (Fig. 4A). Additionally, there was substantial  
253 nucleotide sequence conservation in the sequence forming the unpaired loop at the top  
254 of the stem-loop structures (i.e., in the hairpin loops) of SL7, SL8 and SL9 (Fig. 5)  
255 implying some functional constraints on these sequences. Each of the predicted  
256 structures in the WT sequence were substantially disrupted in the CDLR scrambled  
257 mutant (Fig. 4B).

258 Further studies were therefore undertaken to dissect the importance of the  
259 individual stem-loops within the 3D<sub>3</sub> fragment for replication of the FMDV replicon. Each  
260 of the five putative RNA structures in the 3D<sub>3</sub> region of the WT replicon were permuted  
261 individually *in silico* introducing the maximum number of nucleotide changes possible to  
262 disrupt the RNA structure whilst maintaining amino acid coding, dinucleotide

263 frequencies and the integrity of the neighbouring RNA structures (Fig. 6 and 7A).  
264 Additionally, a replicon where all five putative RNA stem-loops were altered (SL7-11<sup>mut</sup>,  
265 using the same mutation strategy as for each individual loop, Fig. 7A) acted as a  
266 negative control (in addition to the replicon with CDLR-scrambled 3D<sub>3</sub> region) to confirm  
267 that mutation of these particular stem-loops, and not of other elements present in the  
268 CDLR replicon with the permuted 3D<sub>3</sub> region, impaired RNA replication. Replication of  
269 ptGFP-replicons carrying individual mutated stem-loops was tested in the same two cell  
270 lines as described above (Fig. 7). As previously observed, replication levels at 8 hpt  
271 were representative of the replication kinetics (Fig. S6). Replication of replicons with  
272 disrupted SL7 and SL8 was not affected in either cell line (Fig. 7B). In contrast,  
273 replication of replicons with disrupted SL9 or SL10 were significantly reduced, although  
274 the effect on replication varied between the cell lines. Disruption of SL9 led to only a  
275 marginal, but statistically significant, reduction of replication in BHK-21 cells (GFP  
276 intensity equal 94% of the GFP signal of the WT replicon, p-value=0.02), whereas the  
277 negative effect on replication in MDBK cells was greater (GFP intensity equal 49% of  
278 the GFP signal of the WT replicon, p-value < 0.001). In both cell lines, disruption of  
279 SL10 reduced replication to a greater extent than disruption of SL9 (GFP intensity, 52%  
280 (p-value < 0.001) of the GFP signal of the WT replicon in BHK-21 cells, and 24% (p-  
281 value < 0.001) of the GFP signal of the WT replicon in MDBK cells), with the replication  
282 profile in bovine cells being close to the replicon with an inactive polymerase (ptGFP-  
283 3D<sup>pol</sup>GNN) and the replicon with the 3D<sub>3</sub> region mutated by the CDLR algorithm (Fig.  
284 7B). Replication of the replicon with disrupted SL11 was reduced only in MDBK cells  
285 (GFP intensity equal 85% of the GFP signal of the WT replicon, p-value < 0.001), but  
286 not BHK-21 cells. Finally, the replicon with all five stem-loops altered (SL7-11<sup>mut</sup>)

287 demonstrated replication comparable to the ptGFP-3D<sup>pol</sup>GNN replication-deficient  
288 control (which give a GFP signal due to translation of the input RNA) in both cell lines  
289 tested (~20% of WT GFP signal, p-value < 0.001, Fig. 7B).

290 To investigate whether the combined mutagenesis of SL9, SL10 and SL11 has a  
291 detrimental effect on replication of the FMDV replicon, constructs with two loops  
292 disrupted (SL9,10<sup>mut</sup> and SL9,11<sup>mut</sup>), or all three loops disrupted (SL9-11<sup>mut</sup>) were tested  
293 as described above for the individual stem-loop mutations (Fig. 8A). In both cell lines,  
294 disruption of SL9 in combination with SL10 (SL9,10<sup>mut</sup>) resulted in a marked reduction of  
295 replicon replication when compared to replicons with the SL9 and SL10 mutated  
296 individually (see Fig. 7B and 8B). Replication of the SL9,10<sup>mut</sup> replicon was severely  
297 disrupted (GFP intensity equal 27% (p-value < 0.001) and GFP intensity equal 20% (p-  
298 value < 0.001) of the GFP signal of the WT replicon in BHK-21 and MDBK cells,  
299 respectively), with replication levels comparable to the SL7-11<sup>mut</sup> negative control (Fig.  
300 8B). Interestingly, disruption of SL11 in combination with SL9 (SL9,11<sup>mut</sup>) resulted in a  
301 significant reduction of replicon replication in both cell lines (GFP intensity equal 60%  
302 (p-value < 0.001) and GFP intensity equal 36% (p-value < 0.001) of the GFP signal of  
303 the WT replicon in BHK-21 and MDBK cells, respectively; Fig. 8), although in BHK-21  
304 cells individual mutation of SL9 and SL11 had only a marginal or no effect, respectively  
305 (see Fig. 7). Our computational prediction of SL9,11<sup>mut</sup> did not suggest any disruption of  
306 the SL10 secondary structure, which is indirectly confirmed by the experimental data  
307 where replication impairment caused by joint permutation within SL9,11<sup>mut</sup> is  
308 significantly less than that of the SL9-11<sup>mut</sup> (GFP intensity equal 60% (p-value < 0.001)  
309 vs GFP intensity equal 28% (p-value < 0.001) of the GFP signal of the WT replicon in

310 BHK cells, and GFP intensity equal 36% (p-value < 0.001) vs GFP intensity equal 20%  
311 (p-value <0.001) of the GFP signal of the WT replicon in MDBK cells, Fig. 8B). In both  
312 cell lines tested, disruption of all three stem-loops (SL9-11<sup>mut</sup>) resulted in a replication  
313 profile comparable to the SL7-11<sup>mut</sup> (Fig. 8B). Table 3 summarises effect of  
314 mutagenesis of each of these stem-loops (individually and in combination) on replication  
315 of the FMDV replicon.

316 **Comparison of the conserved stem-loops within the FMDV 3D<sub>3</sub> region to**  
317 **structures found in the 3' terminal 3D encoding region of poliovirus.** Two stem  
318 loops (referred to as loop  $\alpha$  and  $\beta$  in Song *et al.* 2012) necessary for poliovirus (PV)  
319 replication are present in the 3' terminal encoding sequence of PV 3D<sup>pol</sup> (37, 38). Since  
320 PV is a member of a different genus in the family *Picornaviridae* and distantly related to  
321 FMDV, we investigated whether any of the stem-loop structures found in the 3' end of  
322 the 3D<sup>pol</sup> encoding region of the FMDV genome were similar to those present in the  
323 equivalent part of the PV genome. Therefore, we compared each of the FMDV RNA  
324 structures (SL7 to SL11) to the PV loops  $\alpha$  and  $\beta$  using RNAforester. As described in  
325 Table 4, the structures identified in the 3' terminal part of the coding region of FMDV  
326 3D<sup>pol</sup> do not appear to resemble those found in the equivalent position of the PV  
327 genome, while (using the same approach) the *cre* structures of PV and FMDV showed  
328 some structural similarity.

## 329 **DISCUSSION**

330 Many aspects of FMDV replication remain poorly understood, such as the  
331 function of RNA structures found within the ORF. Here we revisited the RNA structural



332 architecture of the FMDV genome and, for the first time, investigated whether the  
333 putative stem-loops localised within the ORF are required for viral genome replication.  
334 Our results are in line with previous studies showing that FMDV has extensive RNA  
335 structure throughout the genome, substantially exceeding that found in viruses of other  
336 genera of the family *Picornaviridae* (e.g. MFED value >10% for FMDV genomic  
337 sequences comparing to <4% for viral sequences belonging to genus *Enterovirus*,  
338 *Hepatovirus*, *Parechovirus* and *Teschovirus*) (12, 56, 59). When compared to the  
339 previous structure predictions performed by Witwer *et al.* 2001, our study identified a  
340 greater number of conserved RNA structures within the FMDV ORF (53 stem-loops,  
341 with some merging into 46 branched structures, versus 25 structures predicted  
342 previously). Since we used a larger dataset than the previous authors (118 relatively  
343 diverse FMDV sequences versus nine used by Witwer *et al.* 2001), it is possible that we  
344 obtained a stronger statistical signal supporting conservation of these additional  
345 structures. Importantly, we found that three of the structures within the coding region of  
346 3D<sup>pol</sup> (i.e., SL9, SL10 and SL11) are critical for efficient replication of an FMDV replicon,  
347 thereby implying that they would provide the same function during virus replication.

348         Despite consistently elevated MFED values, the FMDV capsid encoding region  
349 contained only four RNA stem-loops which were conserved in all serotypes. Viral  
350 genomes characterised by high MFED values and low conservation of individual RNA  
351 structures have been observed before (66). For instance, the coding region of hepatitis  
352 C virus (HCV) showed elevated MFED values, while, except for the terminal genomic  
353 regions, the individual stem-loop structures were distinct between different HCV  
354 genotypes and even subtypes (66-68). Similarly, FMDV showed dense serotype-specific

355 RNA structure within its capsid encoding region, which were not shared among other  
356 serotypes (as found in (66) and independently in here).

357 To identify functional RNA structures, we applied the CDLR algorithm to permute  
358 a genomic FMDV sequence (60). While the degree of possible mutagenesis is  
359 necessarily limited by protein coding, dinucleotide frequency, and codon usage  
360 constraints, the CDLR algorithm substantially disrupted secondary RNA structure of the  
361 native FMDV sequence in all regions apart from region encoding for 2C (Table 2 and  
362 Fig. S2). Since the permutation of the entire  $\Delta$ 1D-3A encoding region (which resulted in  
363 more extensive changes to the RNA structure) had a minimal effect on replication of the  
364 FMDV replicon, it is safe to state that conserved RNA stem-loops within the 2C  
365 encoding region are not essential for replicon of the FMDV replication *in vitro*.

366 Contrastingly, the CDLR scanning method identified three structures located at  
367 the 3' terminal part of the 3D<sup>pol</sup> encoding region that were important for replication of the  
368 FMDV replicon. Of these, SL10 showed the highest degree of pairing conservation and  
369 appeared to be the predominant structure important for replication of the FMDV  
370 replicon. Mutation of SL9, SL10 or SL11 showed a much greater reduction of replicon  
371 replication in MDBK cells compared to BHK cells. MDBK cells have been shown to  
372 secrete high levels of interferon (IFN) upon stimulation (69), while BHK-21 cells are  
373 known to lack an intact IFN pathway (70, 71). Furthermore, a number of published  
374 results suggest that RNA structure might directly or indirectly play a role in the  
375 modulation of antiviral responses (42, 54, 72, 73). Collectively, these observations  
376 suggest that SL9, SL10 and SL11 could play additional roles in the evasion of antiviral  
377 responses, and therefore mutation of these structures led to a drastic reduction in

378 replication of the FMDV replicon in IFN-competent cell lines. In both cell lines tested,  
379 deletion of two or more stem-loops (SL9, SL10 and SL11) in combination significantly  
380 impaired replication of the replicon, suggesting that even in the absence of a fully  
381 functional antiviral pathway all three stem-loops are important for FMDV replication.  
382 Similarly to the viral genome, replication of an FMDV replicon involves viral protein  
383 synthesis, and the sequential synthesis of negative- (i.e. complementary) and positive-  
384 strand (i.e. genomic) viral RNA. Thus, although SL9-11 are required for replication of the  
385 replicon further studies are required to dissect which of these process (viral RNA  
386 translation and/or viral RNA replication) are dependent on SL9, SL10 and SL11.  
387 Interestingly, in the PV genome stem-loops within the coding region of 3D<sup>pol</sup> have been  
388 identified that are required for viral RNA synthesis (37, 38). However, these structures  
389 do not appear to share sequence or structural similarity with SL9, SL10 or SL11 in the  
390 FMDV genome.

391         The observation that replication of the FMDV replicon mutants with disrupted  
392 RNA structure elsewhere in the regions encoding the nsps (i.e., spanning 1D through to  
393 most of 3D<sup>pol</sup>) was surprising. The maintenance of extensive conserved internal base-  
394 pairing and consistently elevated MFED values observed in the relatively diverse set of  
395 FMDV isolate sequences analysed indeed strongly argues that the RNA structures  
396 formed by those genomic regions must play some functional role in the FMDV  
397 replication cycle. It is possible that at least some of the apparently 'non-functional' RNA  
398 structures are genome-scale ordered RNA structure (GORS) which may play a role in  
399 persistence of FMDV in its natural host (56, 59). While FMDV causes an acute disease  
400 in domestic animals (14, 74), it is known to persist in African Buffalo (*Syncerus caffer*),

401 which are a natural reservoir of the virus (75-78). Since FMDV and African Buffalo are  
402 thought to have co-evolved together, it is possible that GORS developed in the FMDV  
403 genome as a part of the virus-host co-adaptation, where they might assist in evasion of  
404 immune recognition. The link between GORS, persistence and ability to minimise  
405 antiviral sensing has been shown for number of unrelated viruses (56, 59, 66, 72). Work  
406 is currently underway to investigate whether any of these remaining structures play a  
407 role in modulation of the antiviral sensing during FMDV replication in its natural host  
408 environment.

409         Although the function of the apparently non-essential RNA structures within the  
410 regions encoding the nsps remains to be defined, due to their conserved nature, they  
411 form a potential target for genome-scale attenuation of a wide range of FMDV strains.  
412 Such a strategy could contribute to the development of live attenuated FMD vaccines  
413 that may improve on the short duration of immunity, which is a shortcoming of current  
414 inactivated vaccines. Alternatively, the manipulation of RNA structures such as SL9, to  
415 provide attenuation in bovine cells but retain efficient growth in vaccine production cell  
416 lines (BHK), could be used to enhance biosafety of inactivated vaccine production. The  
417 hazards associated with the large-scale production of killed vaccine viruses include both  
418 accidental release of virus from high containment production facilities, and the  
419 distribution and use of improperly inactivated FMD vaccines (79-81).

420         In summary, we have generated a comprehensive map of RNA secondary  
421 structure located within the ORF of the FMDV genome and identified novel stem-loops  
422 within the coding region for 3D<sup>pol</sup> that appear critical for FMDV replication. While the  
423 function of the other conserved structures remains to be determined they can be

424 targeted to improve understanding of the FMDV biology. In addition, they have the  
425 potential to help develop safer FMDV vaccines, an idea which has been proposed for  
426 other viruses (6, 56, 82). We also show that usage of the CDLR algorithm can be  
427 successfully utilised to permute RNA sequences in search of functional RNA structures,  
428 which can be applied beyond viral RNA molecules using a freely available and easy to  
429 use package (60).

## 430 **MATERIALS AND METHODS**

431 **Cell lines.** Madin-Darby bovine kidney (MDBK) and baby hamster kidney (BHK-  
432 21) cells were obtained from the American Type Culture Collection (ATCC) and  
433 maintained in Dulbecco's Modified Eagle Medium containing either 10% foetal bovine  
434 serum (FBS) or 10% horse serum (MDBK cells) at 37 °C and 5% CO<sub>2</sub>.

435 **FMDV sequence dataset.** Full genome sequences of 105 viruses were selected  
436 from GenBank database based on nucleotide distance of their 1D encoding region,  
437 ensuring that they represent sequence variability that is known to be present between  
438 all seven FMDV serotypes (Table 5). Since sequences of SAT serotypes are the least  
439 represented on public databases, 13 additional full genome sequences of field SAT  
440 isolates (SAT 1 = 2, SAT 2 = 4 and SAT 3 = 7) were generated for the purpose of this  
441 study (isolates: SAT1/TAN/3/80, SAT1/ZAM/2/88, SAT2/BOT-BUFF/7/72,  
442 SAT2/MOZ/1/70, SAT2/ZAM-BUFF/18/74, SAT2/ZIM/8/89, SAT3/BOT/209/67,  
443 SAT3/RHO/26/76, SAT3/RHO/3/75, SAT3/SAR/9/79, SAT3/ZAM/P2/96(MUL-4),  
444 SAT3/ZIM/P25/91(UR-7), SAT3/ZIM/P26/90(HV-5) using methodology previously  
445 described (45).

446           **Prediction of conserved RNA structures within the FMDV genome.** The  
447 genomic sequences of the 118 FMDV field isolates were aligned using the MAFFT X-  
448 INS-i algorithm which, in addition to nucleotide identity, takes into account RNA  
449 secondary structure information (83, 84). This approach minimized the potential to  
450 overlook conserved RNA structures that might be hidden in a nucleotide alignment  
451 containing distantly related FMDV sequences. The multiple sequence alignment (MSA)  
452 was analysed using the RNAalifold program implemented in The ViennaRNA Package  
453 (61), using the following options: a ribosum scoring matrix, calculating the partition  
454 function and base pairing probability matrix in addition to the minimum free energy  
455 (MFE) structure, producing structure without lonely pairs and with dangling energies  
456 added for the bases adjacent to a helix on both sides. Then, the conserved RNA  
457 structures in the full genome were 'tidied up' by removing gaps and long-distance  
458 interactions (i.e., interactions which were separated by 400 nucleotides or more). The  
459 same was repeated for each FMDV serotype individually (using the dataset described  
460 above) and serotype-specific conserved RNA structure prediction was compared to the  
461 conserved structure prediction for all 118 FMDV sequences. Only stem-loops which  
462 were verified in all seven FMDV serotypes were considered as highly conserved.  
463 Finally, the conserved, whole genome FMDV RNA structure was visualised by drawing  
464 a dot plot graph using an awk script written *in house* and available upon request. To  
465 visualise shorter genomic fragments containing predicted conserved RNA structure(s)  
466 (e.g., the 3' terminal part of the 3D<sup>pol</sup> encoding region and individual loops) in more  
467 detail, a particular genomic region together with its conserved structure prediction was  
468 extracted and visualised using an on-line Forna tool implemented in The ViennaRNA  
469 Web Services (85). The extent of nucleotide conservation in sequence forming hairpin

470 loops of RNA structures (Fig. 5) was visualised using WebLogo 3.7.4 web server (86,  
471 87).

472 Pairwise distance and MFED for full genome sequences of all seven FMDV  
473 serotypes (dataset described above) were prepared using the Sequence Distances and  
474 Folding Energy Scan programs implemented in SSE v1.4 package (60), respectively.  
475 The MSA for MFED analysis was prepared as described above, while controls for  
476 calculation of MFED were generated by the NDR algorithm. For sequence distance  
477 analysis the FMDV genomes were separated into three genomic regions: the 5' UTR,  
478 the ORF and the 3' UTR which were aligned individually by different MAFFT algorithms.  
479 The 5' and 3' UTRs were aligned by MAFFT X-INS-i, while the nucleotide sequence of  
480 the ORF was firstly converted into amino acid sequence using TRANSEQ EMBOS  
481 program (88), aligned using MAFFT G-INS-i (89) and then such generated amino acid  
482 alignment was converted into nucleotide sequence using TRANALIGN EMBOS program  
483 (88). All aligned genomic fragments were manually combined into a single MSA  
484 containing FMDV whole genomes. For both analyses the mean values for successive  
485 400 base fragments with 20 nucleotide increment across the genome were plotted.

486 The average MFED values of the regions encoding the nsps of the FMDV  
487 isolates (i.e., dataset described above), the ptGFP-replicon and 50 CDLR-permuted  
488 ptGFP mutants were calculated as described above.

489 Since there appears to be a lot of ambiguity around the poly(C) tract, that region  
490 and its flanking positions were excluded from all analyses.

491 ***In silico* design of mutants containing modified segments within the non-**  
492 **structural encoding region.** The regions encoding the nsps of the FMDV genome  
493 were chosen for mutagenesis by restriction site usage (sequence listed in Fig. 3A-B). To  
494 disrupt RNA secondary structures predicted in each restriction fragment of native FMDV  
495 genomes, sequences were mutated using the CDLR algorithm implemented in the  
496 Scramble Sequences Program of the SSE v1.4 package.

497 Structure prediction of the 3' terminal part of the 3D<sup>pol</sup> encoding region of the WT  
498 replicon which was scrambled by the CDLR algorithm (the 3D<sub>3</sub> region) was generated  
499 as described above but using RNAfold (61), and using parameters corresponding to the  
500 ones applied in RNAalifold. The predicted structure was visualised in Forna.

501 To 'quantify' the difference between structure of the WT and scrambled replicons  
502 (Fig. 3A-B, Table 2), the whole genomic sequence of WT and each scrambled replicon  
503 was predicted using RNAfold, and fragments of the RNA secondary structure prediction  
504 corresponding to the permuted regions encoding the nsps (Fig. 3A-B) were compared  
505 using RNAforester and global alignment, with the relative scores as a measure of  
506 structure similarity (61, 63, 64).

507 For each predicted RNA structure located at the 3' terminal part of the FMDV  
508 3D<sup>pol</sup> encoding region (SL7 - SL11 in the 3D<sub>3</sub> region) nucleotides were changed  
509 manually (see results section). Individual putative stem-loops and their mutants were  
510 predicted using RNAfold implemented in The ViennaRNA package and mfold RNA  
511 structure prediction server (90), and were visualised using Forna RNA secondary  
512 structure visualisation tool.



513           **Comparison of putative RNA structures located within 3' terminal 3D<sup>pol</sup>**  
514 **encoding region of FMDV and PV.** Computational prediction of two conserved PV  
515 RNA structures located in the 3' terminal 3D<sup>pol</sup> encoding region (termed loop  $\alpha$  and  $\beta$  as  
516 in Song *et. al.* 2012) and described previously (37, 38) was repeated as described  
517 above. This was done as there was some discrepancy between the two publications  
518 about the exact structure of the two PV stem-loops. PV sequences representing  
519 variability of the PV 3D encoding region (GenBank accession numbers: NC\_002058.3,  
520 DQ890388.1, FJ769378.1, EU794963.1, AY560657.1, HF913427.1, EU794957.1,  
521 EU794956.1, AF538842.1, EU684057.1, AF405667.1, AF405666.1, KJ170457.1,  
522 KJ170438.1, KU866422.1, AM884184.1, AJ132961.1, MG212491.1, MG212488.1,  
523 MG212485.1, MG212463.1, MG212456.1, MG212441.1, MG212440.1, KY941933.1,  
524 KY941932.1, KR259355.1, KC784372.1, KC880377.1, JX275352.1, JX274995.1,  
525 KX162704.1) were used. The RNA loop  $\alpha$  and  $\beta$  were isolated and their structure  
526 aligned to the 3' terminal part of the 3D<sup>pol</sup> encoding region containing FMDV stem-loops  
527 SL7 - SL11 (3D<sub>3</sub> region) using the RNAforester software and 'small-in-large similarity'  
528 calculation to determine whether any of the previously described PV stem-loops were  
529 similar to any of the FMDV RNA structures identified in this study. For more detailed  
530 analysis, each isolated FMDV putative RNA stem-loop (SL7 - SL11) was directly  
531 compared to PV loop  $\alpha$  or  $\beta$  using RNAforester as described above.

532           **Clone construction.** Sequences with mutations generated by the CDLR  
533 algorithm and nucleotide fragments containing mutated loops SL7 – SL11 were  
534 synthesised by custom DNA synthesis (GeneArt, Life Technologies) and provided within  
535 standard cloning vectors. These sequences were firstly sub-cloned into the pSP72

536 vector (Promega) to provide the unique restriction enzyme sites for subsequent cloning  
537 into the WT ptGFP replicon (Fig. 3A; (65)).

538 ***In vitro* transcription.** Replicon constructs (5 µg) were linearised with Ascl (New  
539 England Biolabs) for 1 h at 37 °C and purified using the E.Z.N.A.™ Gel Extraction Kit  
540 (Omega Bio-Tek). Linear replicon DNA (500 ng) was added to transcription reactions at  
541 a final volume of 100 µl containing the following: Transcription Optimised Buffer  
542 (Promega), 10 mM DTT (Promega), 100 U RNasin Ribonuclease Inhibitor (Promega),  
543 40 U T7 RNA polymerase (Promega), 20 mM rNTP's (Promega) and nuclease-free  
544 water. Reactions were incubated at 37 °C for 2 h and the resulting transcript integrity  
545 assessed by agarose gel electrophoresis. RNA yield was quantified using the Quantus  
546™ Fluorometer (Promega), according to the manufacturer's instructions.

547 **Cell transfection.** Approximately 20 h prior to transfection cells were seeded into  
548 24 or 12 well plates at the appropriate cell seeding density to achieve ~ 80%  
549 confluency. The following day, media was removed and replaced with FluoroBrite™  
550 DMEM (Gibco) supplemented with 2% FBS and 4 mM glutamine. Replicon transcript  
551 RNA (0.5-1 µg) was transfected into triplicate or quadruplicate cell monolayers using  
552 Lipofectamine 2000 transfection reagent as per the manufacturer's recommendation  
553 (Thermo Fisher Scientific).

554 **Live cell imaging.** Live cell image analysis was performed using the IncuCyte  
555 ZOOM kinetic imaging system (Essen BioScience) as described previously (62). Images  
556 were captured hourly for a period of 24 h with green fluorescent protein intensity  
557 measured using the integrated IncuCyte ZOOM image processing software. Data are

558 shown as the average cell (green object) GFP intensity per well at 8 h post-transfection  
559 (where expression is at the maximum level).

560 **Statistical analysis.** Replicon mutants were compared to WT ptGFP using one-  
561 way analysis of variance (ANOVA). Differences between groups were considered to be  
562 significant at a *P* value of <0.05 (\*), <0.01 (\*\*) or <0.001 (\*\*\*). Error bars represent  
563 standard error of the mean (S.E.M.) of multiple independent experiments. Statistical  
564 analyses were performed with GraphPad Prism 8.00 (GraphPad Software, San Diego,  
565 California USA, [www.graphpad.com](http://www.graphpad.com)).

566 **Data availability.** Full genome FMDV sequences generated as a part of this  
567 study were submitted to GenBank and are available as following accession numbers:  
568 MW355668 - MW355680.

## 569 **ACKNOWLEDGMENTS**

570 We thank colleagues in the WRLFMD (Pirbright, UK) for providing the FMDV  
571 isolates used in this study. The Pirbright Institute receives grant-aided support from the  
572 Biotechnology and Biological Sciences Research Council (BBSRC) of the United  
573 Kingdom (projects BB/E//00007035, BB/E//00007036 and BBS/E//00007037)  
574 providing funds to cover the open access charges for this paper. This work was  
575 supported by funding from UK Department for Environment, Food and Rural Affairs  
576 (Defra research project SE2943) and BBSRC research grant BB/K003801/1.

577 **Author Contributions.** Lidia Lasecka-Dykes, Paolo Ribeca and Peter Simmonds  
578 performed bioinformatic analyses; Fiona Tulloch, Garry A. Luke, Lidia Lasecka-Dykes  
579 and Sarah Gold carried out experimental work and analysed data; Nick J. Knowles,

580 Jemma Wadsworth and Mehreen Azhar selected and isolated viruses; Lidia Lasecka-  
581 Dykes and Caroline F. Wright sequenced FMDV isolates and analysed sequencing  
582 data; Fiona Tulloch, Lidia Lasecka-Dykes, Terry Jackson, Tobias J. Tuthill, Martin D.  
583 Ryan, Peter Simmonds and Donald P. King conceived and designed the experiments;  
584 Martin D. Ryan, Terry Jackson, Tobias J. Tuthill and Donald P. King directed the study;  
585 Martin D. Ryan, Terry Jackson, Tobias J. Tuthill and Donald P. King acquisitioned the  
586 funding; Lidia Lasecka-Dykes, Fiona Tulloch and Peter Simmonds wrote the initial draft  
587 of the manuscript; all authors reviewed and edited the manuscript.

588 **Conflicts of Interest.** The authors declare no conflict of interest. The funders  
589 had no role in the design of the study; in the collection, analyses, or interpretation of  
590 data; in the writing of the manuscript, and in the decision to publish the results.

## 591 REFERENCES

- 592 1. Wang J, Bakkers JM, Galama JM, Bruins Slot HJ, Pilipenko EV, Agol VI,  
593 Melchers WJ. 1999. Structural requirements of the higher order RNA kissing  
594 element in the enteroviral 3'UTR. *Nucleic Acids Res* 27:485-90.
- 595 2. Watts JM, Dang KK, Gorelick RJ, Leonard CW, Bess JW, Jr., Swanstrom R,  
596 Burch CL, Weeks KM. 2009. Architecture and secondary structure of an entire  
597 HIV-1 RNA genome. *Nature* 460:711-6.
- 598 3. Wu B, Grigull J, Ore MO, Morin S, White KA. 2013. Global organization of a  
599 positive-strand RNA virus genome. *PLoS Pathog* 9:e1003363.
- 600 4. Dethoff EA, Boerneke MA, Gokhale NS, Muhire BM, Martin DP, Sacco MT,  
601 McFadden MJ, Weinstein JB, Messer WB, Horner SM, Weeks KM. 2018.

- 602 Pervasive tertiary structure in the dengue virus RNA genome. Proceedings of the  
603 National Academy of Sciences of the United States of America 115:11513-  
604 11518.
- 605 5. Thurner C, Witwer C, Hofacker IL, Stadler PF. 2004. Conserved RNA secondary  
606 structures in Flaviviridae genomes. J Gen Virol 85:1113-1124.
- 607 6. Firth AE. 2014. Mapping overlapping functional elements embedded within the  
608 protein-coding regions of RNA viruses. Nucleic Acids Res 42:12425-39.
- 609 7. Akiyama BM, Laurence HM, Massey AR, Costantino DA, Xie XP, Yang YJ, Shi  
610 PY, Nix JC, Beckham JD, Kieft JS. 2016. Zika virus produces noncoding RNAs  
611 using a multi-pseudoknot structure that confounds a cellular exonuclease.  
612 Science 354:1148-1152.
- 613 8. Tuplin A, Evans DJ, Simmonds P. 2004. Detailed mapping of RNA secondary  
614 structures in core and NS5B-encoding region sequences of hepatitis C virus by  
615 RNase cleavage and novel bioinformatic prediction methods. J Gen Virol  
616 85:3037-3047.
- 617 9. Ferhadian D, Contrant M, Printz-Schweigert A, Smyth RP, Paillart JC, Marquet R.  
618 2018. Structural and Functional Motifs in Influenza Virus RNAs. Front Microbiol  
619 9:559.
- 620 10. Michalak P, Soszynska-Jozwiak M, Biala E, Moss WN, Keszy J, Szutkowska B,  
621 Lenartowicz E, Kierzek R, Kierzek E. 2019. Secondary structure of the segment 5  
622 genomic RNA of influenza A virus and its application for designing antisense  
623 oligonucleotides. Sci Rep 9:3801.
- 624 11. Simmonds P, Karakasiliotis I, Bailey D, Chaudhry Y, Evans DJ, Goodfellow IG.  
625 2008. Bioinformatic and functional analysis of RNA secondary structure elements

- 626 among different genera of human and animal caliciviruses. *Nucleic Acids Res*  
627 36:2530-46.
- 628 12. Witwer C, Rauscher S, Hofacker IL, Stadler PF. 2001. Conserved RNA  
629 secondary structures in Picornaviridae genomes. *Nucleic Acids Res* 29:5079-89.
- 630 13. Tuplin A. 2015. Diverse roles and interactions of RNA structures during the  
631 replication of positive-stranded RNA viruses of humans and animals. *J Gen Virol*  
632 96:1497-503.
- 633 14. Alexandersen S, Zhang Z, Donaldson AI, Garland AJ. 2003. The pathogenesis  
634 and diagnosis of foot-and-mouth disease. *J Comp Pathol* 129:1-36.
- 635 15. Kitching RP. 1999. Foot-and-mouth disease: current world situation. *Vaccine*  
636 17:1772-4.
- 637 16. King DP, Henstock M. 2016. OIE/FAO Foot-and-Mouth Disease Reference  
638 Laboratory Network Annual Report 2016.
- 639 17. Gloster J, Sellers RF, Donaldson AI. 1982. Long-Distance Transport of Foot-and-  
640 Mouth-Disease Virus over the Sea. *Veterinary Record* 110:47-52.
- 641 18. Scudamore JM, Harris DM. 2002. Control of foot and mouth disease: lessons  
642 from the experience of the outbreak in Great Britain in 2001. *Revue Scientifique*  
643 *Et Technique De L Office International Des Epizooties* 21:699-710.
- 644 19. Knowles NJ, Samuel AR. 2003. Molecular epidemiology of foot-and-mouth  
645 disease virus. *Virus Res* 91:65-80.
- 646 20. Rweyemamu M, Roeder P, Mackay D, Sumption K, Brownlie J, Leforban Y,  
647 Valarcher JF, Knowles NJ, Saraiva V. 2008. Epidemiological patterns of foot-and-  
648 mouth disease worldwide. *Transbound Emerg Dis* 55:57-72.

- 649 21. Weaver GV, Domenech J, Thiermann AR, Karesh WB. 2013. Foot and mouth  
650 disease: a look from the wild side. *J Wildl Dis* 49:759-85.
- 651 22. Di Nardo A, Knowles NJ, Paton DJ. 2011. Combining livestock trade patterns  
652 with phylogenetics to help understand the spread of foot and mouth disease in  
653 sub-Saharan Africa, the Middle East and Southeast Asia. *Rev Sci Tech* 30:63-85.
- 654 23. Samuel AR, Knowles NJ. 2001. Foot-and-mouth disease type O viruses exhibit  
655 genetically and geographically distinct evolutionary lineages (topotypes). *J Gen  
656 Virol* 82:609-21.
- 657 24. Kitching P, Hammond J, Jeggo M, Charleston B, Paton D, Rodriguez L, Heckert  
658 R. 2007. Global FMD control - Is it an option? *Vaccine* 25:5660-5664.
- 659 25. Mason PW, Grubman MJ, Baxt B. 2003. Molecular basis of pathogenesis of  
660 FMDV. *Virus Res* 91:9-32.
- 661 26. Ryan MD, Belsham GJ, King AM. 1989. Specificity of enzyme-substrate  
662 interactions in foot-and-mouth disease virus polyprotein processing. *Virology*  
663 173:35-45.
- 664 27. Strebel K, Beck E. 1986. A second protease of foot-and-mouth disease virus. *J  
665 Virol* 58:893-9.
- 666 28. Vakharia VN, Devaney MA, Moore DM, Dunn JJ, Grubman MJ. 1987. Proteolytic  
667 processing of foot-and-mouth disease virus polyproteins expressed in a cell-free  
668 system from clone-derived transcripts. *J Virol* 61:3199-207.
- 669 29. Klump W, Marquardt O, Hofschneider PH. 1984. Biologically-Active Protease of  
670 Foot and Mouth-Disease Virus Is Expressed from Cloned Viral Cdna in  
671 *Escherichia-Coli*. *Proceedings of the National Academy of Sciences of the United  
672 States of America-Biological Sciences* 81:3351-3355.

- 673 30. Belsham GJ. 2005. Translation and replication of FMDV RNA. *Curr Top Microbiol*  
674 *Immunol* 288:43-70.
- 675 31. Donnelly MLL, Luke G, Mehrotra A, Li XJ, Hughes LE, Gani D, Ryan MD. 2001.  
676 Analysis of the aphthovirus 2A/2B polyprotein 'cleavage' mechanism indicates  
677 not a proteolytic reaction, but a novel translational effect: a putative ribosomal  
678 'skip'. *Journal of General Virology* 82:1013-1025.
- 679 32. Doronina VA, Wu C, de Felipe P, Sachs MS, Ryan MD, Brown JD. 2008. Site-  
680 specific release of nascent chains from ribosomes at a sense codon. *Mol Cell*  
681 *Biol* 28:4227-39.
- 682 33. Ryan MD, Donnelly M, Lewis A, Mehrotra AP, Wilkie J, Gani D. 1999. A model  
683 for nonstoichiometric, cotranslational protein scission in eukaryotic ribosomes.  
684 *Bioorganic Chemistry* 27:55-79.
- 685 34. Ryan MD, King AM, Thomas GP. 1991. Cleavage of foot-and-mouth disease  
686 virus polyprotein is mediated by residues located within a 19 amino acid  
687 sequence. *J Gen Virol* 72 ( Pt 11):2727-32.
- 688 35. Jackson RJ, Howell MT, Kaminski A. 1990. The novel mechanism of initiation of  
689 picornavirus RNA translation. *Trends Biochem Sci* 15:477-83.
- 690 36. McKnight KL, Lemon SM. 1998. The rhinovirus type 14 genome contains an  
691 internally located RNA structure that is required for viral replication. *RNA* 4:1569-  
692 84.
- 693 37. Burrill CP, Westesson O, Schulte MB, Strings VR, Segal M, Andino R. 2013.  
694 Global RNA structure analysis of poliovirus identifies a conserved RNA structure  
695 involved in viral replication and infectivity. *J Virol* 87:11670-83.



- 696 38. Song Y, Liu Y, Ward CB, Mueller S, Fitcher B, Skiena S, Paul AV, Wimmer E.  
697 2012. Identification of two functionally redundant RNA elements in the coding  
698 sequence of poliovirus using computer-generated design. *Proc Natl Acad Sci U S*  
699 *A* 109:14301-7.
- 700 39. Rieder E, Paul AV, Kim DW, van Boom JH, Wimmer E. 2000. Genetic and  
701 biochemical studies of poliovirus cis-acting replication element cre in relation to  
702 VPg uridylylation. *J Virol* 74:10371-80.
- 703 40. Kloc A, Rai DK, Rieder E. 2018. The Roles of Picornavirus Untranslated Regions  
704 in Infection and Innate Immunity. *Front Microbiol* 9:485.
- 705 41. Clarke BE, Brown AL, Currey KM, Newton SE, Rowlands DJ, Carroll AR. 1987.  
706 Potential Secondary and Tertiary Structure in the Genomic Rna of Foot-and-  
707 Mouth-Disease Virus. *Nucleic Acids Research* 15:7067-7079.
- 708 42. Kloc A, Diaz-San Segundo F, Schafer EA, Rai DK, Kenney M, de Los Santos T,  
709 Rieder E. 2017. Foot-and-mouth disease virus 5'-terminal S fragment is required  
710 for replication and modulation of the innate immune response in host cells.  
711 *Virology* 512:132-143.
- 712 43. Serrano P, Pulido MR, Saiz M, Martinez-Salas E. 2006. The 3' end of the foot-  
713 and-mouth disease virus genome establishes two distinct long-range RNA-RNA  
714 interactions with the 5' end region. *J Gen Virol* 87:3013-22.
- 715 44. Newton SE, Carroll AR, Campbell RO, Clarke BE, Rowlands DJ. 1985. The  
716 sequence of foot-and-mouth disease virus RNA to the 5' side of the poly(C) tract.  
717 *Gene* 40:331-6.
- 718 45. Lasecka-Dykes L, Wright CF, Di Nardo A, Logan G, Mioulet V, Jackson T, Tuthill  
719 TJ, Knowles NJ, King DP. 2018. Full Genome Sequencing Reveals New

- 720 Southern African Territories Genotypes Bringing Us Closer to Understanding  
721 True Variability of Foot-and-Mouth Disease Virus in Africa. *Viruses-Basel* 10.
- 722 46. Zhu Z, Yang F, Cao W, Liu H, Zhang K, Tian H, Dang W, He J, Guo J, Liu X,  
723 Zheng H. 2019. The Pseudoknot Region of the 5' Untranslated Region Is a  
724 Determinant of Viral Tropism and Virulence of Foot-and-Mouth Disease Virus. *J*  
725 *Virol* 93.
- 726 47. Lopez de Quinto S, Martinez-Salas E. 1997. Conserved structural motifs located  
727 in distal loops of aphthovirus internal ribosome entry site domain 3 are required  
728 for internal initiation of translation. *J Virol* 71:4171-5.
- 729 48. Belsham GJ, Brangwyn JK. 1990. A region of the 5' noncoding region of foot-  
730 and-mouth disease virus RNA directs efficient internal initiation of protein  
731 synthesis within cells: involvement with the role of L protease in translational  
732 control. *J Virol* 64:5389-95.
- 733 49. Kuhn R, Luz N, Beck E. 1990. Functional analysis of the internal translation  
734 initiation site of foot-and-mouth disease virus. *J Virol* 64:4625-31.
- 735 50. Serrano P, Ramajo J, Martinez-Salas E. 2009. Rescue of internal initiation of  
736 translation by RNA complementation provides evidence for a distribution of  
737 functions between individual IRES domains. *Virology* 388:221-9.
- 738 51. Mason PW, Bezbrodova SV, Henry TM. 2002. Identification and  
739 characterization of a cis-acting replication element (cre) adjacent to the internal  
740 ribosome entry site of foot-and-mouth disease virus. *J Virol* 76:9686-94.
- 741 52. Nayak A, Goodfellow IG, Belsham GJ. 2005. Factors required for the  
742 Uridylylation of the foot-and-mouth disease virus 3B1, 3B2, and 3B3 peptides by  
743 the RNA-dependent RNA polymerase (3Dpol) in vitro. *J Virol* 79:7698-706.

- 744 53. Saiz M, Gomez S, Martinez-Salas E, Sobrino F. 2001. Deletion or substitution of  
745 the aphthovirus 3' NCR abrogates infectivity and virus replication. *J Gen Virol*  
746 82:93-101.
- 747 54. Pulido MR, Sobrino F, Borrego B, Saiz M. 2009. Attenuated Foot-and-Mouth  
748 Disease Virus RNA Carrying a Deletion in the 3' Noncoding Region Can Elicit  
749 Immunity in Swine. *Journal of Virology* 83:3475-3485.
- 750 55. Logan G, Newman J, Wright CF, Lasecka-Dykes L, Haydon DT, Cottam EM,  
751 Tuthill TJ. 2018. Deep Sequencing of Foot-and-Mouth Disease Virus Reveals  
752 RNA Sequences Involved in Genome Packaging. *Journal of Virology* 92.
- 753 56. Simmonds P, Tuplin A, Evans DJ. 2004. Detection of genome-scale ordered  
754 RNA structure (GORS) in genomes of positive-stranded RNA viruses:  
755 Implications for virus evolution and host persistence. *RNA* 10:1337-51.
- 756 57. Rivas E, Eddy SR. 2000. Secondary structure alone is generally not statistically  
757 significant for the detection of noncoding RNAs. *Bioinformatics* 16:583-605.
- 758 58. Workman C, Krogh A. 1999. No evidence that mRNAs have lower folding free  
759 energies than random sequences with the same dinucleotide distribution. *Nucleic*  
760 *Acids Res* 27:4816-22.
- 761 59. Davis M, Sagan SM, Pezacki JP, Evans DJ, Simmonds P. 2008. Bioinformatic  
762 and physical characterizations of genome-scale ordered RNA structure in  
763 mammalian RNA viruses. *J Virol* 82:11824-36.
- 764 60. Simmonds P. 2012. SSE: a nucleotide and amino acid sequence analysis  
765 platform. *BMC Res Notes* 5:50.
- 766 61. Lorenz R, Bernhart SH, Honer Zu Siederdisen C, Tafer H, Flamm C, Stadler PF,  
767 Hofacker IL. 2011. ViennaRNA Package 2.0. *Algorithms Mol Biol* 6:26.

- 768 62. Tulloch F, Pathania U, Luke GA, Nicholson J, Stonehouse NJ, Rowlands DJ,  
769 Jackson T, Tuthill T, Haas J, Lamond AI, Ryan MD. 2014. FMDV replicons  
770 encoding green fluorescent protein are replication competent. *J Virol Methods*  
771 209:35-40.
- 772 63. Hoechsmann M, Toeller T, Giegerich R, Kurtz S. Local Similarity of RNA  
773 Secondary Structures, p 159-168. *In* (ed),
- 774 64. Jiang T, Wang LS, Zhang KZ. 1995. Alignment of Trees - an Alternative to Tree  
775 Edit. *Theoretical Computer Science* 143:137-148.
- 776 65. Herod MR, Loundras EA, Ward JC, Tulloch F, Rowlands DJ, Stonehouse NJ.  
777 2015. Employing transposon mutagenesis to investigate foot-and-mouth disease  
778 virus replication. *J Gen Virol* 96:3507-3518.
- 779 66. Simmonds P, Cuypers L, Irving WL, McLauchlan J, Cooke GS, Barnes E,  
780 Consortium S-H, Ansari MA. 2020. Impact of virus subtype and host IFNL4  
781 genotype on large-scale RNA structure formation in the genome of hepatitis C  
782 virus. *RNA* 26:1541-1556.
- 783 67. Pirakitikulr N, Kohlway A, Lindenbach BD, Pyle AM. 2016. The Coding Region of  
784 the HCV Genome Contains a Network of Regulatory RNA Structures. *Mol Cell*  
785 62:111-20.
- 786 68. Mauger DM, Golden M, Yamane D, Williford S, Lemon SM, Martin DP, Weeks  
787 KM. 2015. Functionally conserved architecture of hepatitis C virus RNA  
788 genomes. *Proc Natl Acad Sci U S A* 112:3692-7.
- 789 69. Luna VER, Luk ADH, Tying SK, Hellman JM, Lefkowitz SS. 1984. Properties of  
790 Bovine Interferons. *Experientia* 40:1410-1412.

- 791 70. Conzelmann KK. 2004. Reverse genetics of Mononegavirales. *Biology of*  
792 *Negative Strand Rna Viruses: The Power of Reverse Genetics* 283:1-41.
- 793 71. Schlender J, Bossert B, Buchholz U, Conzelmann KK. 2000. Bovine respiratory  
794 syncytial virus nonstructural proteins NS1 and NS2 cooperatively antagonize  
795 alpha/beta interferon-induced antiviral response. *J Virol* 74:8234-42.
- 796 72. Witteveldt J, Blundell R, Maarleveld JJ, McFadden N, Evans DJ, Simmonds P.  
797 2014. The influence of viral RNA secondary structure on interactions with innate  
798 host cell defences. *Nucleic Acids Research* 42:3314-3329.
- 799 73. Smyth RP, Negroni M, Lever AM, Mak J, Kenyon JC. 2018. RNA Structure-A  
800 Neglected Puppet Master for the Evolution of Virus and Host Immunity. *Front*  
801 *Immunol* 9:2097.
- 802 74. Zhang ZD, Alexandersen S. 2004. Quantitative analysis of foot-and-mouth  
803 disease virus RNA loads in bovine tissues: implications for the site of viral  
804 persistence. *Journal of General Virology* 85:2567-2575.
- 805 75. Condy JB, Hedger RS, Hamblin C, Barnett IT. 1985. The duration of the foot-and-  
806 mouth disease virus carrier state in African buffalo (i) in the individual animal and  
807 (ii) in a free-living herd. *Comp Immunol Microbiol Infect Dis* 8:259-65.
- 808 76. Vosloo W, Dwarka RM, Bastos ADS, Esterhuysen JJ, Sahle M, Sangare O.  
809 2004. Molecular epidemiological studies of foot-and-mouth disease virus in sub-  
810 Saharan Africa indicate the presence of large numbers of topotypes: implications  
811 for local and international control. .
- 812 77. Vosloo W, de Klerk LM, Boshoff CI, Botha B, Dwarka RM, Keet D, Haydon DT.  
813 2007. Characterisation of a SAT-1 outbreak of foot-and-mouth disease in captive

- 814 African buffalo (*Syncerus caffer*): clinical symptoms, genetic characterisation and  
815 phylogenetic comparison of outbreak isolates. *Vet Microbiol* 120:226-40.
- 816 78. Thomson GR, Vosloo W, Esterhuysen JJ, Bengis RG. 1992. Maintenance of foot  
817 and mouth disease viruses in buffalo (*Syncerus caffer* Sparrman, 1779) in  
818 southern Africa. *Rev Sci Tech* 11:1097-107.
- 819 79. Spratt BG. 2007. Independent Review of the safety of UK facilities handling foot-  
820 and-mouth disease virus.
- 821 80. Callaghan B. 2007. A review of the regulatory framework for handling animal  
822 pathogens.
- 823 81. Sangula AK, Siegismund HR, Belsham GJ, Balinda SN, Masembe C, Muwanika  
824 VB. 2011. Low diversity of foot-and-mouth disease serotype C virus in Kenya:  
825 evidence for probable vaccine strain re-introductions in the field. *Epidemiol Infect*  
826 139:189-96.
- 827 82. Runckel C, Westesson O, Andino R, DeRisi JL. 2013. Identification and  
828 manipulation of the molecular determinants influencing poliovirus recombination.  
829 *PLoS Pathog* 9:e1003164.
- 830 83. Katoh K, Toh H. 2008. Improved accuracy of multiple ncRNA alignment by  
831 incorporating structural information into a MAFFT-based framework. *BMC*  
832 *Bioinformatics* 9:212.
- 833 84. Katoh K, Asimenos G, Toh H. 2009. Multiple alignment of DNA sequences with  
834 MAFFT. *Methods Mol Biol* 537:39-64.
- 835 85. Kerpedjiev P, Hammer S, Hofacker IL. 2015. Forna (force-directed RNA): Simple  
836 and effective online RNA secondary structure diagrams. *Bioinformatics* 31:3377-  
837 9.

- 838 86. Schneider TD, Stephens RM. 1990. Sequence logos: a new way to display  
839 consensus sequences. *Nucleic Acids Res* 18:6097-100.
- 840 87. Crooks GE, Hon G, Chandonia JM, Brenner SE. 2004. WebLogo: a sequence  
841 logo generator. *Genome Res* 14:1188-90.
- 842 88. Madeira F, Park YM, Lee J, Buso N, Gur T, Madhusoodanan N, Basutkar P,  
843 Tivey ARN, Potter SC, Finn RD, Lopez R. 2019. The EMBL-EBI search and  
844 sequence analysis tools APIs in 2019. *Nucleic Acids Res* 47:W636-W641.
- 845 89. Katoh K, Kuma K, Toh H, Miyata T. 2005. MAFFT version 5: improvement in  
846 accuracy of multiple sequence alignment. *Nucleic Acids Res* 33:511-8.
- 847 90. Zuker M. 2003. Mfold web server for nucleic acid folding and hybridization  
848 prediction. *Nucleic Acids Res* 31:3406-15.

849

850

851

**Table 1**

852

Number of conserved stem-loops within each FMDV genomic region

| <b>Genomic region</b>           | <b>Number of predicted stem-loops<sup>a</sup></b> |
|---------------------------------|---------------------------------------------------|
| S-fragment                      | 1                                                 |
| The rest of 5' UTR <sup>b</sup> | 11 <sup>*</sup>                                   |
| L <sup>pro</sup>                | 4                                                 |
| 1A (VP4)                        | 0                                                 |
| 1B (VP2)                        | 1                                                 |
| 1C (VP3)                        | 1                                                 |
| 1 (VP1)                         | 2                                                 |
| 2A                              | 1 <sup>**</sup>                                   |
| 2B                              | 7                                                 |
| 2C                              | 10                                                |
| 3A                              | 3                                                 |
| 3B <sub>1</sub>                 | 1                                                 |
| 3B <sub>2</sub>                 | 2                                                 |
| 3B <sub>3</sub>                 | 1 <sup>***</sup>                                  |
| 3C                              | 3                                                 |
| 3D                              | 17                                                |
| 3' UTR                          | 2                                                 |

853 <sup>a</sup>Each hairpin loop was counted individually;

854 <sup>b</sup>Excludes poly(C) tract and pseudoknot regions;

855 <sup>\*</sup>*cre* (a single hairpin loop), IRES domain 2 (a single hairpin loop), IRES domain 3 (five  
856 hairpin loops), IRES domain 4 (two hairpin loops), IRES domain 5 (a single hairpin  
857 loop), plus a single hairpin loop downstream of IRES;

858 <sup>\*\*</sup>Four nucleotides of the 5' end of the stem belong to the 1D encoding region;

859 <sup>\*\*\*</sup>17 nucleotides of the 5' end of the stem belong to the 3B<sub>3</sub> encoding region.



860

**Table 2**

861 Similarity comparison of RNA structures within corresponding WT and CDLR replicon genomic fragments, calculated

862

using RNAforester program

|                                                         | Replicon fragments <sup>a</sup> |       |      |       |       |       |                    |                 |                 |            |                         |                   |                          |
|---------------------------------------------------------|---------------------------------|-------|------|-------|-------|-------|--------------------|-----------------|-----------------|------------|-------------------------|-------------------|--------------------------|
|                                                         | $\Delta$ 1D-2B                  | 2B-2C | 2C   | 2C-3A | 3A-3B | 3B-3C | 3C-3D <sub>1</sub> | 3D <sub>2</sub> | 3D <sub>3</sub> | S-fragment | <i>cre</i> <sup>*</sup> | IRES <sup>*</sup> | SL1 and SL2 <sup>*</sup> |
| <b>WT vs CDLR relative similarity score<sup>b</sup></b> | -1.33                           | -0.71 | 0.24 | -0.87 | -0.80 | -1.69 | -1.06              | -0.72           | -1.66           | 1          | 1                       | 1                 | 0.64                     |

863

864 <sup>a</sup>nsps encoding regions fragments as presented in Fig. 3A-B865 <sup>b</sup>value =1 is for two identical structures: the greater the distance from 1, the less structure similarity between two

866 corresponding fragments. For simplicity, the output of RNAforester was rounded up to two decimal places.

867 <sup>\*</sup>comparison of RNA structures within the 5' and 3' UTR of the WT and CDLR replicon acts as control (note that while UTR

868 regions were not permuted in this study, there was possibility that permutation of the regions encoding the nsps might

869 affect the pairings within UTRs).

870

871

**Table 3**

872 Summary of replication profiles of FMDV replicons after mutagenesis of conserved stem-loops localised within the 3D<sub>3</sub>  
 873 genomic region

|               | Replicon <sup>a</sup> |                    |                    |                     |                     |                       |                       |                       |                       |                  |
|---------------|-----------------------|--------------------|--------------------|---------------------|---------------------|-----------------------|-----------------------|-----------------------|-----------------------|------------------|
| Cell Line     | SL7 <sup>mut</sup>    | SL8 <sup>mut</sup> | SL9 <sup>mut</sup> | SL10 <sup>mut</sup> | SL11 <sup>mut</sup> | SL9,10 <sup>mut</sup> | SL9,11 <sup>mut</sup> | SL9-11 <sup>mut</sup> | SL7-11 <sup>mut</sup> | GNN <sup>b</sup> |
| <b>BHK-21</b> | WT                    | WT                 | 94%                | 52%                 | WT                  | 27%                   | 60%                   | 28%                   | 23%                   | 11%              |
| <b>MDBK</b>   | WT                    | WT                 | 49%                | 24%                 | 85%                 | 20%                   | 36%                   | 20%                   | 20%                   | 18%              |

874

875 <sup>a</sup>See Figure 7 and 8 for study design and data;

876 <sup>b</sup>GNN – replicon with an inactive polymerase, any GFP signal is due to translation;

877 WT – wild type replicon-like replication profile;

878 % - percentage of the WT ptGFP signal, where significant effect on replicon replication was observed.

879

880

**Table 4**

881 Similarity<sup>a</sup> comparison of RNA structures within the 3D<sup>pol</sup> encoding region of FMDV and PV, calculated using RNAforester  
 882 program

| <b>PV</b> \ <b>FMDV</b> | <b>SL7</b> | <b>SL8</b> | <b>SL9</b> | <b>SL10</b> | <b>SL11</b> | <b>cre*</b> |
|-------------------------|------------|------------|------------|-------------|-------------|-------------|
| <b>α</b>                | -1.46      | -1.83      | -2.30      | -2.10       | -1.85       | nd          |
| <b>β</b>                | -1.18      | -2.07      | -2.52      | -2.27       | -2.07       | nd          |
| <b>cre*</b>             | nd         | nd         | nd         | nd          | nd          | 0.30        |

883

884 <sup>a</sup>Relative similarity scores equal to 1 are for two identical structures: the greater the distance from 1, the less structure  
 885 similarity between two compared features. For simplicity, the output of RNAforester was rounded up to two decimal  
 886 places.

887 \*comparison of *cre* of PV to *cre* of FMDV acts as a control of the structure prediction and RNAforester analysis.

888

**Table 5**

889

FMDV sequences selected from GenBank

| <b>Serotype:</b> | <b>Number of isolates:</b> | <b>GenBank accession numbers:</b>                                                                                                                                                                                |
|------------------|----------------------------|------------------------------------------------------------------------------------------------------------------------------------------------------------------------------------------------------------------|
| A                | 19                         | AY593788, MH053305, JF749843, HM854024, HQ832580, MH053306, KM268896, AY593802, KJ608371, MH053307, AY593751, AY593754, AY593761, AY593764, AY593766, AY593767, HM854022, AY593791, AY593794                     |
| Asia 1           | 12                         | AY593795, AY687334, DQ533483, DQ989306, DQ989315, DQ989319, EF149010, EF614458, HQ632774, JF739177, KM268898, MF782478                                                                                           |
| C                | 6                          | MH053308, KM268897, MH053309, AJ133357, MH053310, AJ007347                                                                                                                                                       |
| O                | 21                         | AY593819, MH053313, MH053311, MH053312, KF112885, KJ206909, HQ632769, HQ632771, KU291242, KR401154, GU384683, KF694737, AJ539140, MH053315, JX040491, MH053317, MH053318, MH053316, KJ560291, DQ404170, KU821591 |
| SAT 1            | 19                         | AY593838, AY593845, MH053319, AY593844, JF749860, MH053321, AY593846, AY593839, AY593842, AY593841, AY593840, MH053322, AY593843, KM268899, MH053323, MH053324, MH053325, MH053326, MH053327                     |
| SAT2             | 15                         | MH053330, MH053332, MH053328, MH053329, JX014255, MH053333, AY593849, JX014256, AY593847, MH053335, KM268900, JF749862, MH053336, MH053337, KU821592                                                             |
| SAT3             | 13                         | AY593853, AY593851, MH053339, MH053340, MH053344, MH053343, AY593850, KJ820999, MH053341, MH053351, KX375417, KM268901, MH053350                                                                                 |

890

891

## Figure 1

892

Extent of the conserved RNA secondary structures within FMDV genome

893

894

895

896

897

898

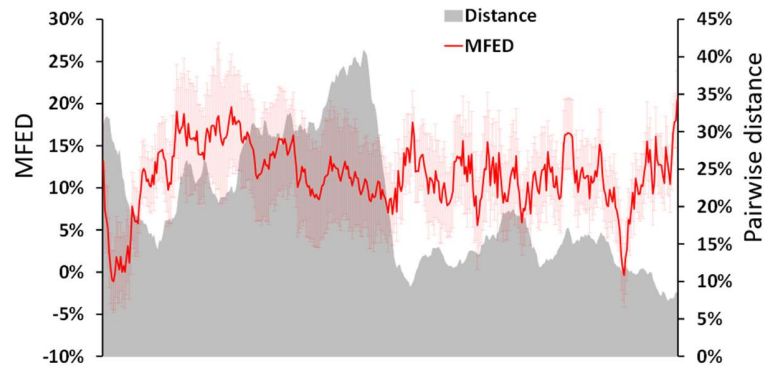

899

900

901

902

903

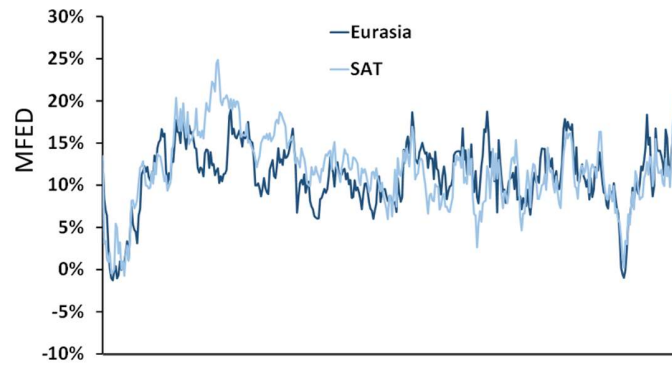

904

905

906

907

908

909

910

911

912

913

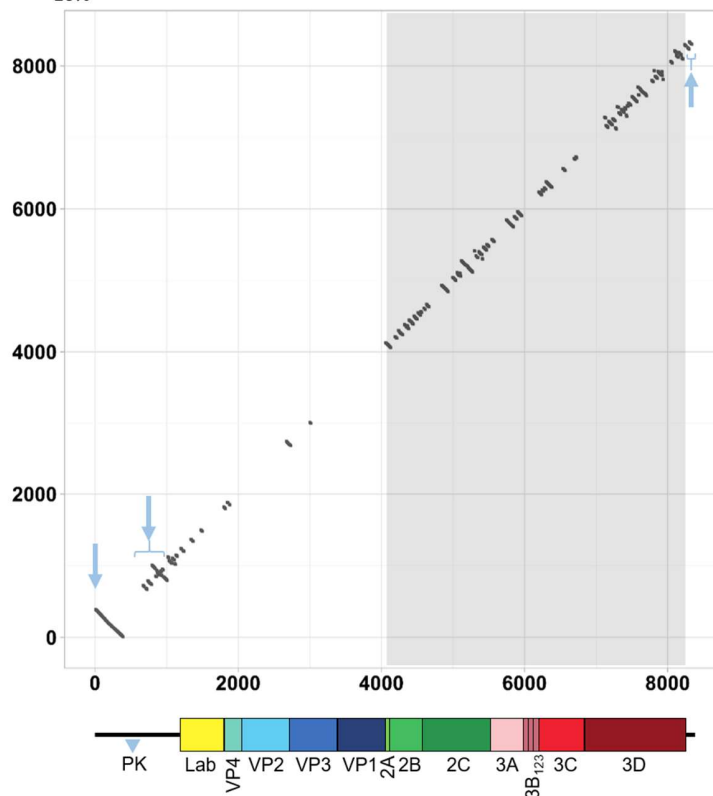

914 Upper panel shows a scan of pairwise distance and mean folding energies difference  
915 (MFED) prepared using SSE v1.4 software and 118 FMDV sequences representing all  
916 seven serotypes. The mean values for successive 400 nt fragments across the genome  
917 are plotted (where each 400 nts segments overlapped its neighbours by 380 nts). The  
918 light red shading represents error bars showing standard deviation from the mean for  
919 each datapoint. The middle panel shows MFED values for the same FMDV genomic  
920 sequences but grouped into Eurasian (A, Asia 1, C and O serotypes) or SAT (SAT 1 - 3  
921 serotypes) clusters. The lower panel shows a dot plot graphical representation of RNA  
922 structures that were conserved across all seven FMDV serotypes. The x-axis and y-axis  
923 represent FMDV genome positions, with each dot representing a single pairing between  
924 two nucleotides, one with its position marked on the x-axis and the other one with its  
925 position marked on the y-axis. The three pale blue arrows indicate location of the S-  
926 fragment, *cre*+IRES and SL1+SL2 structures on the dot plot graph, respectively (for a  
927 detailed visualisation of these structures see Fig. S1). The blue triangle marked PK  
928 indicates the genomic region containing pseudoknot structures which was excluded  
929 from these analyses. The area corresponding to the regions encoding the non-structural  
930 proteins (i.e., P2 and P3) is highlighted in grey and for clarity, a schematic  
931 representation of the FMDV genome is drawn to scale.

932

933

## Figure 2

934

Comparison of average MFED values for wild type (WT) and CDLR-scrambled

935

sequences

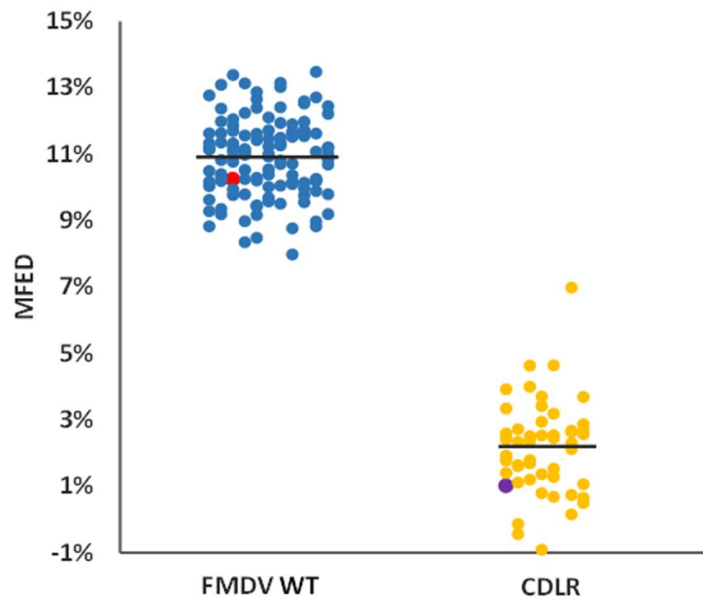

936

937 Mean folding energy difference (MFED) for the regions encoding non-structural proteins  
938 (nsps) of 118 FMDV field isolates representing all seven serotypes (blue dots), WT  
939 ptGFP-replicon used in this study (red dot) and CDLR scrambled sequences (yellow  
940 dots). Among the latter is the CDLR scrambled sequence used in this study to generate  
941 replicon mutants (purple dot). To obtain CDLR-scrambled sequences the sequence of  
942 the regions encoding the nsps of the WT replicon was permuted 50 times by codon-  
943 shuffling to minimise RNA secondary structure, while preserving protein coding, native  
944 dinucleotide frequencies, and codon usage.

945

946

### Figure 3

947

Replication of CDLR replicons within BHK-21 and MDBK cells

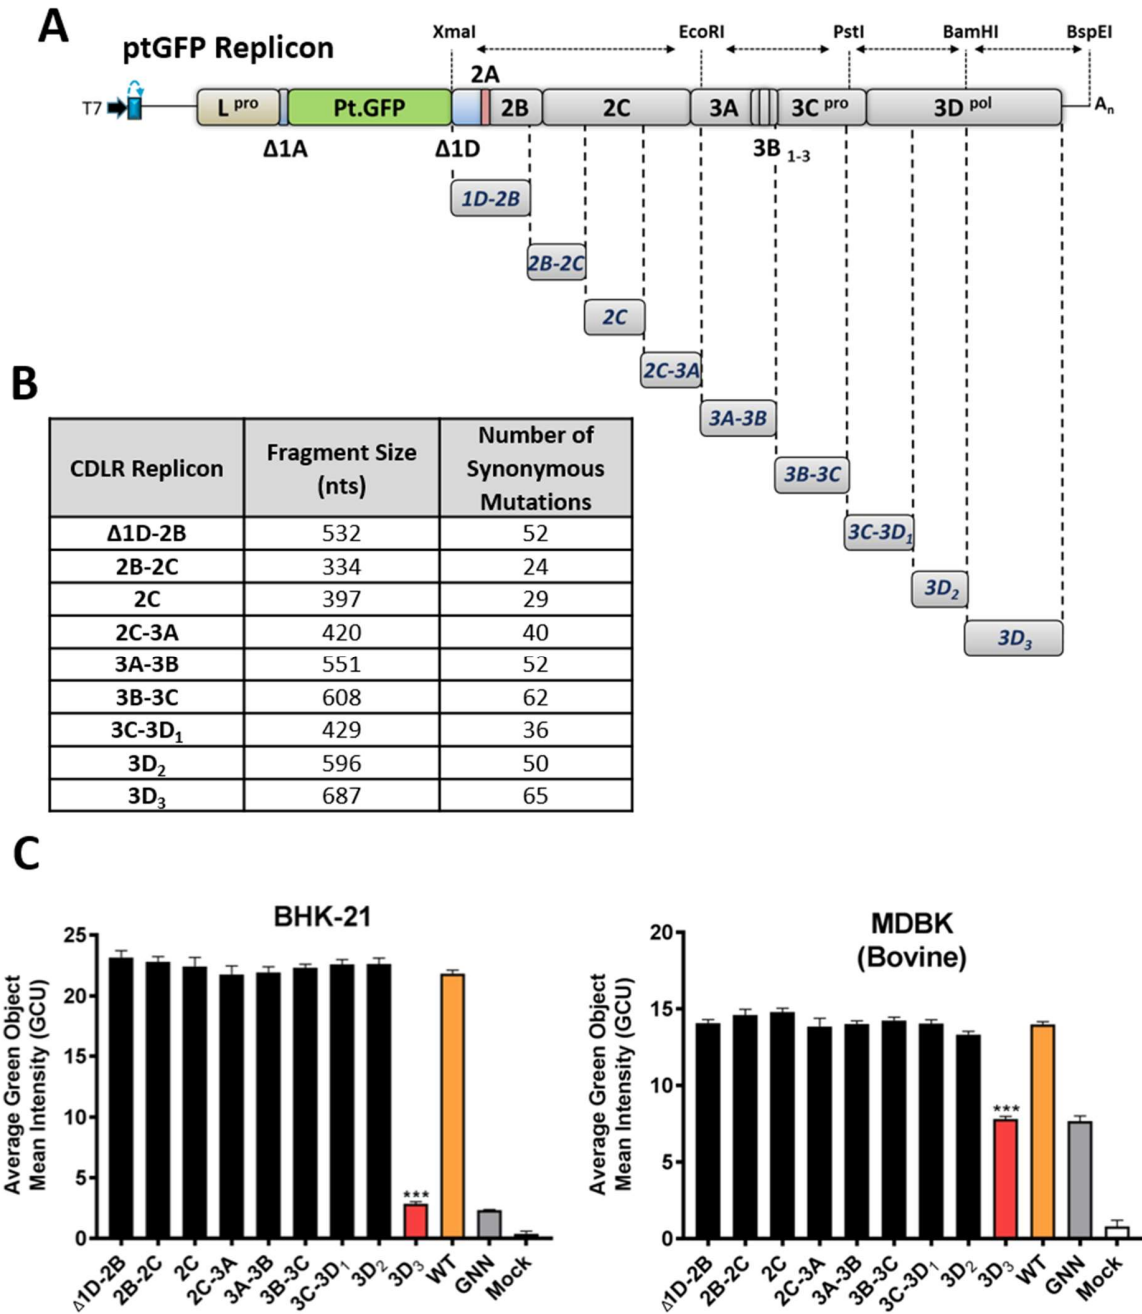

948



949 **(A)** Schematic representation of CDLR replicons. Mutated regions were firstly inserted  
950 into a sub-clone encoding the non-structural proteins (nsps) of the genome ( $\Delta$ 1D-polyA)  
951 before cloning into the WT ptGFP-replicon using the unique restriction enzymes shown.  
952 **(B)** CDLR replicon insert sizes and number of mutations within each region. Regions  
953 were chosen based on restriction site usage within the regions encoding nsps.  
954 Mutations were introduced as described within the materials and methods section. **(C)**  
955 IncuCyte data represent the average cell (green object) GFP intensity per well at 8 h  
956 post-transfection. Results are the mean of three independent experiments  $\pm$  standard  
957 error. Significant differences between WT ptGFP and CDLR replicons were determined  
958 (\*\*\*,  $P < 0.001$ ). The replication-incompetent 3D<sup>pol</sup> active site mutant (GDD  $\rightarrow$  GNN)  
959 ptGFP-3D<sup>pol</sup>GNN was used as a negative control.

960

961

### Figure 4

962

Schematic representation of predicted conserved RNA structures located at the 3'

963

terminal end of the region encoding 3D<sup>pol</sup>

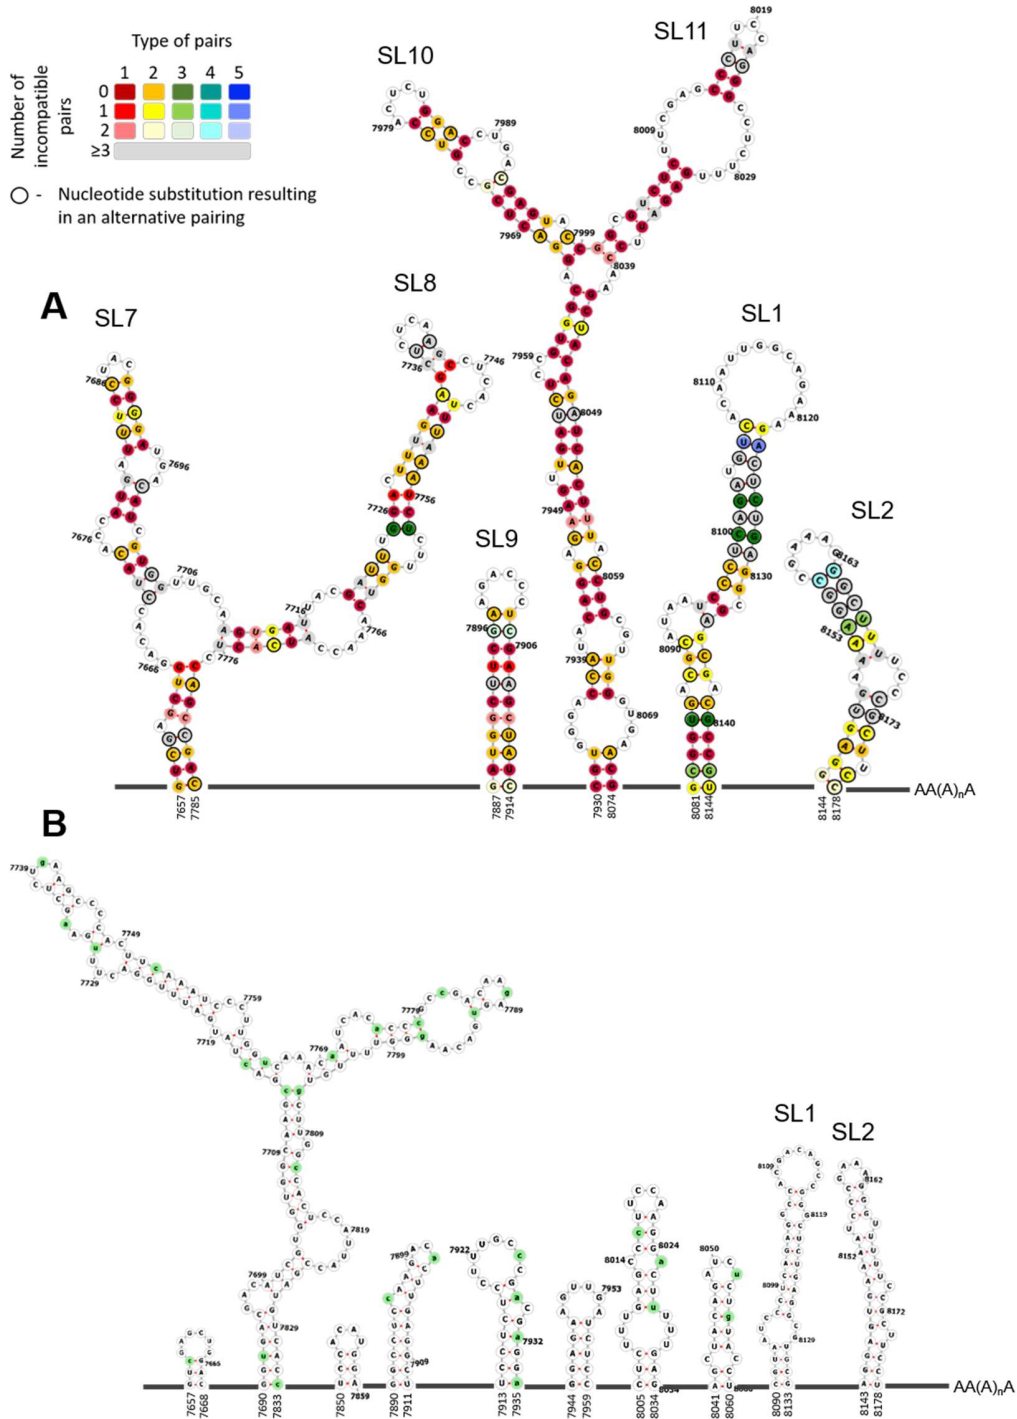

964

965 **(A)** Schematic representation of conserved (in all FMDV serotypes) RNA secondary  
966 structures located at the 3' terminal end of the region encoding 3D<sup>pol</sup> (i.e., the 3D<sub>3</sub> region  
967 described in Fig. 3). Conserved putative stem-loops (SL7 – SL11) are shown, where two  
968 stem-loops located in the 3' UTR described before (SL1 and SL2) act as a control of the  
969 computational prediction. Nucleotide positions which form conserved pairing were  
970 colour-coded according to number of pairing types ('red = 1' to 'blue = 5') and  
971 conservation of a pairing ('dark shades = nucleotide pairing occurred in all FMDV  
972 isolates' to 'light shades = lack of nucleotide pairing in two FMDV isolates'). Positions  
973 coloured in light grey show lack of pairing for three or more FMDV isolates. Black  
974 circular outline indicates nucleotide position where a substitution resulted in an  
975 alternative pairing (see included legend for detail). Unstructured regions are  
976 represented as dark grey lines and are not drawn to scale. Numbers represent  
977 nucleotide positions corresponding to the sequence of A/Brazil/1979 isolate (GenBank  
978 accession number AY593788). Supplementary Table S1 specifies details represented  
979 graphically in the figure legend. **(B)** Schematic representation of RNA secondary  
980 structures located in the 3D<sub>3</sub> region after scrambling using the CDLR algorithm,  
981 demonstrating how RNA secondary structure in this region was changed. Mutated  
982 nucleotide positions are highlighted in green. Unstructured regions are represented as  
983 dark grey lines and are not drawn to scale. Numbers represent nucleotide positions  
984 corresponding to the sequence of the A/Brazil/1979 isolate.

985

986

## Figure 5

987

Extent of nucleotide conservation within hairpin loops of SL7 - SL11 RNA structures

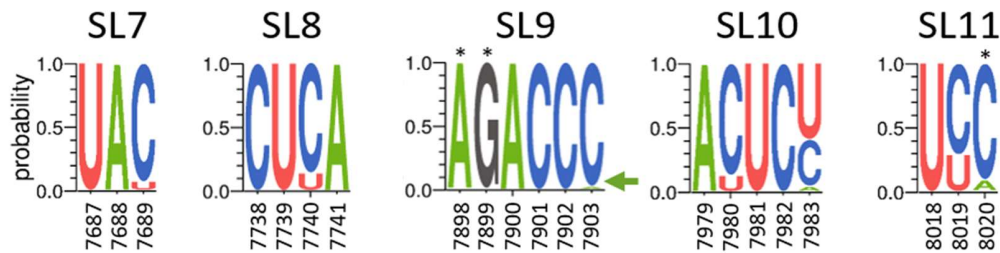

988

989 Sequence logos were generated using WebLogo 3.7.4 web server based on sequences

990 of 118 FMDV isolates. Probability shows the extent of nucleotide occurrence at a given

991 position. Numbers represent nucleotide positions corresponding to the sequence of

992 A/Brazil/1979 isolate (GenBank accession number AY593788). Asterix (\*) marks

993 positions where substitution occurs in 1 out of 118 FMDV isolates but due to a limited

994 resolution of the y axis it does not appear in the sequence logos (these are: A7898G,

995 G7899A and C8020G). The green arrow points to C7903A substitution which due to

996 height of the A symbol could go unnoticed.

997

998

## Figure 6

999

Disruption of the predicted RNA secondary structures by silent mutagenesis

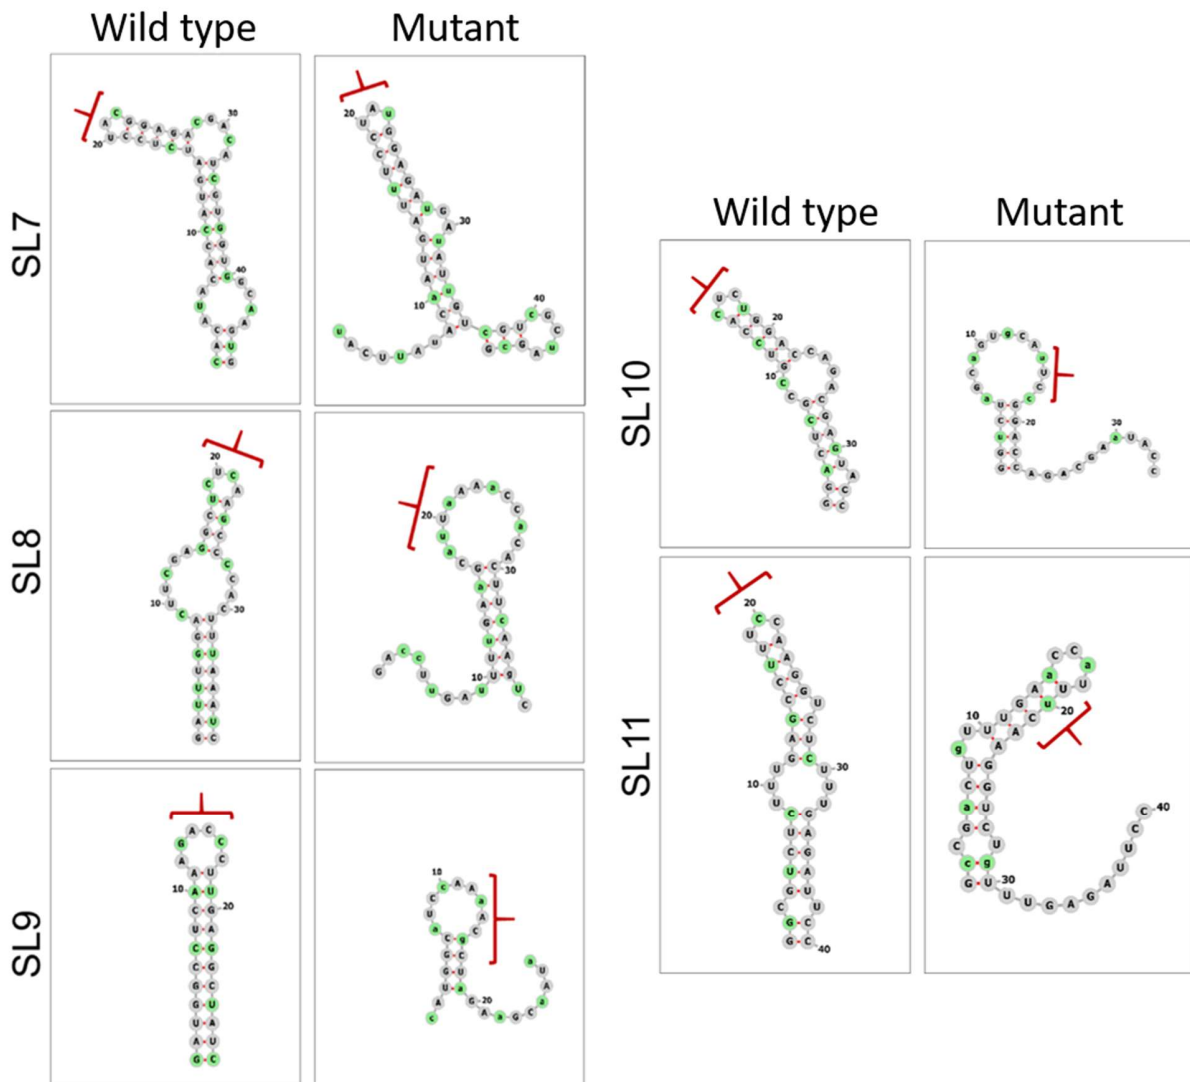

1000

1001 The conserved stem-loops identified in the 3' terminal end of the region encoding 3D<sup>pol</sup>

1002 (i.e., 3D<sub>3</sub>) of FMDV were predicted individually by Mfold for the WT ptGFP-replicon.

1003 Predicted WT stem-loops were mutated to cause the highest possible disruption or

1004 change to the RNA structure without affecting neighbouring stem-loops, while keeping

1005 the same amino acid sequence and dinucleotide ratio (i.e., CpG and UpA). Predicted  
1006 WT and mutated stem-loops visualised in Forna web server are shown. Nucleotides  
1007 highlighted in green represent mutated positions, while red brackets represent positions  
1008 of the hairpin loop in the WT structures and their altered position in the disrupted  
1009 structures after mutagenesis.

1010

1011

## Figure 7

1012

Effect of individual stem-loop (SL7 - SL11) mutagenesis on replication of the FMDV

1013

replicon

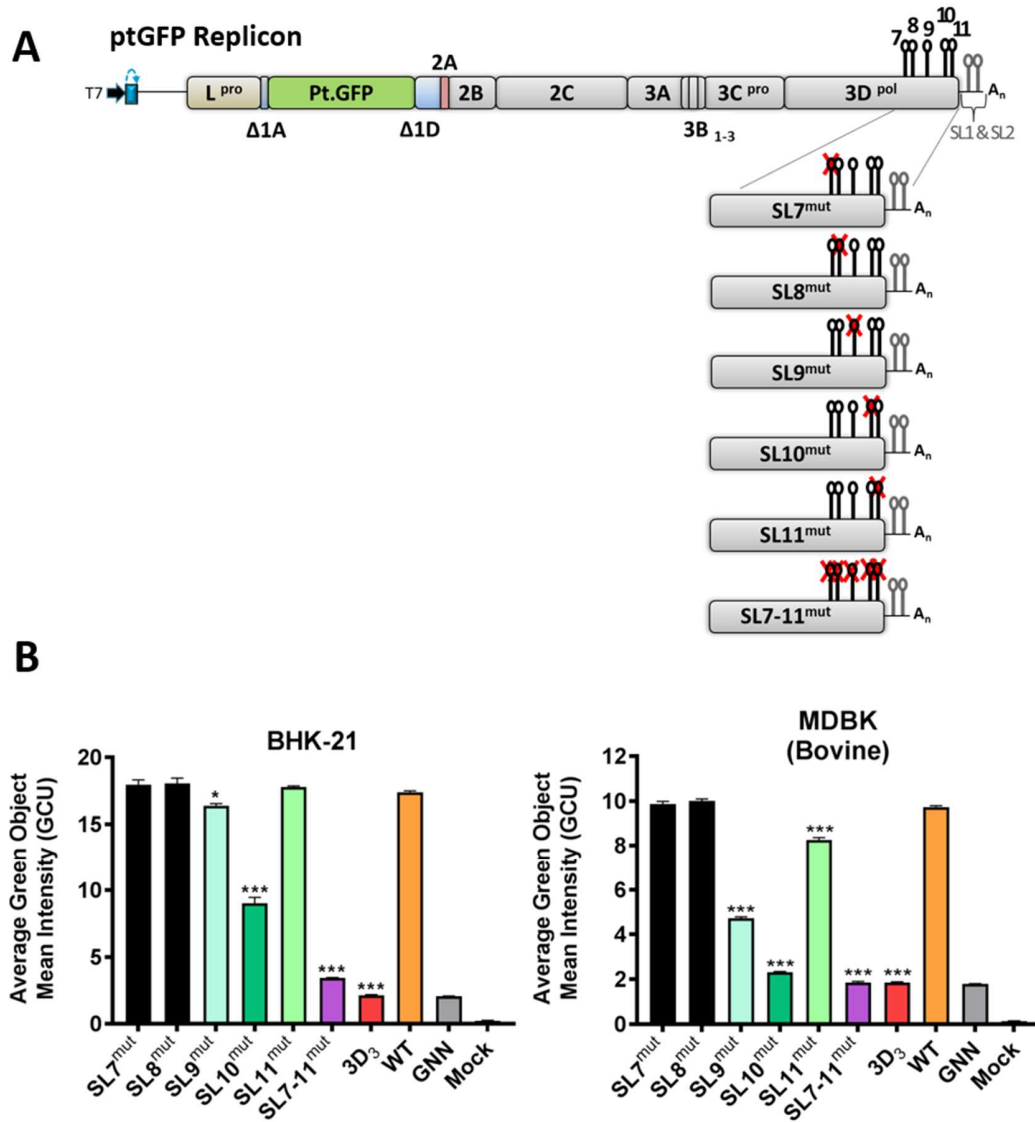

1014 **(A)** Schematic representation of FMDV replicon constructs containing stem-loop  
1015 mutations (SL9<sup>mut</sup> – SL11<sup>mut</sup>). Sequence inserts containing stem-loop mutations were  
1016 cloned directly into the ptGFP-replicon using the unique restriction enzymes BamHI and  
1017 BspEI. **(B)** IncuCyte data represent the average cell (green object) GFP intensity per  
1018 well at 8 h post-transfection within BHK-21 and MDBK cells. Results are the mean of  
1019 three independent experiments  $\pm$  standard error. Significant differences between WT  
1020 ptGFP and SL<sup>mut</sup> replicons were determined (\*,  $P < 0.05$ ; \*\*\*,  $P < 0.001$ ).

1021



1022

## Figure 8

1023 Effect of combined mutagenesis of stem-loops 9, 10 and 11 on replication of the FMDV

1024 replicon

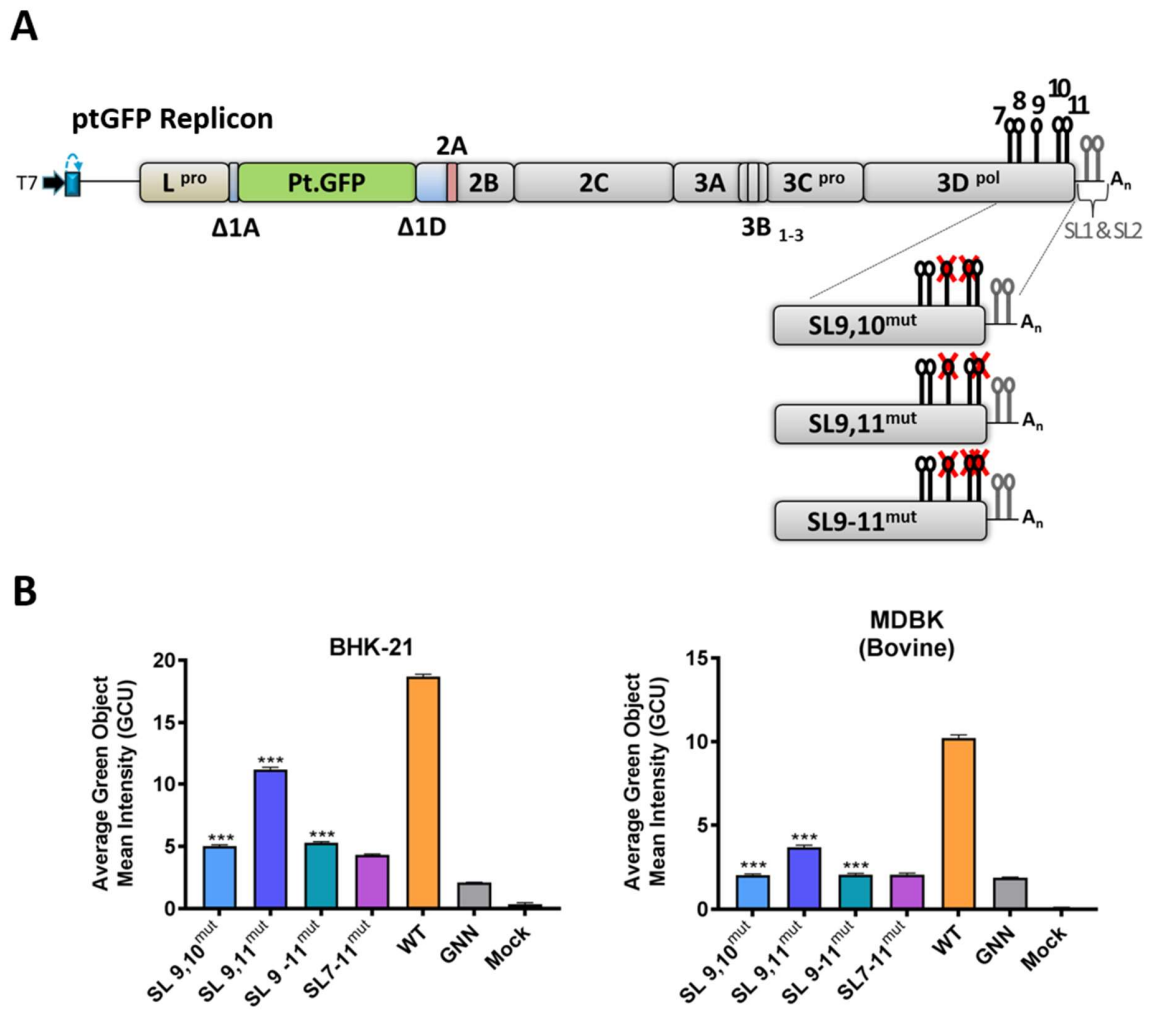

1025

1026 **(A)** Schematic representation of FMDV replicon constructs containing combined stem-  
1027 loop mutations (SL9,10<sup>mut</sup>, SL9,11<sup>mut</sup> and SL9-11<sup>mut</sup>). Sequence inserts containing stem-  
1028 loop mutations were cloned directly into the ptGFP-replicon using the unique restriction  
1029 enzymes BamHI and BspEI. **(B)** IncuCyte data represent the average cell (green object)  
1030 GFP intensity per well at 8 h post-transfection. Results are the mean of three  
1031 independent experiments  $\pm$  standard error. Significant differences between WT ptGFP  
1032 and SL<sup>mut</sup> replicons were determined (\*\*\*,  $P < 0.001$ ).
